# Supplementary material for: Global, regional, and national prevalence of asthma in 2019: a systematic analysis and modelling study
Source: PubMed Central journal article supplement (PMC9239324; doi:10.7189/jogh.12.04052), 2022-06-29
Supplement: jogh-12-04052-s001.pdf [file jogh-12-04052-s001.pdf]

# Supplement

|                                                                                                                                                                                          |           |
|------------------------------------------------------------------------------------------------------------------------------------------------------------------------------------------|-----------|
| <b>Appendix 1. Searches, world regions, countries and territories .....</b>                                                                                                              | <b>2</b>  |
| <b>Table S1. Search strategy to identify studies reporting the prevalence of asthma in the general population .....</b>                                                                  | <b>2</b>  |
| <b>Table S2. Country or territory list in World Health Organization and World Bank regions .....</b>                                                                                     | <b>3</b>  |
| <b>Appendix 2. eMethods: Detailed description of the global, regional and national estimation of asthma prevalence .....</b>                                                             | <b></b>   |
| <b>4 Figure S1. Contribution of data sources across world regions .....</b>                                                                                                              | <b>7</b>  |
| <b>Figure S2. The prevalence of current wheezing, ever wheezing, current asthma and ever asthma, by age and sex group, based on contributing datapoints from included articles .....</b> | <b>8</b>  |
| <b>Table S3. The age- and sex-adjusted effects of study-level variables on current wheezing, ever wheezing, current asthma and ever asthma .....</b>                                     | <b>9</b>  |
| <b>Appendix 3. Modelling the global prevalence of asthma .....</b>                                                                                                                       | <b>12</b> |
| <b>Table S4. Models for constructing the prevalence of current wheezing, ever wheezing, current asthma and ever asthma .....</b>                                                         | <b>12</b> |
| <b>Appendix 4. Characteristics of the included studies .....</b>                                                                                                                         | <b>13</b> |
| <b>Table S5. Characteristics of included studies with prevalence data for sample population .....</b>                                                                                    | <b>13</b> |
| <b>Table S6. List of the included articles .....</b>                                                                                                                                     | <b>37</b> |
| <b>Appendix 5. Estimation of the regional and national numbers of people with asthma in 2019 .....</b>                                                                                   | <b>47</b> |
| <b>Figure S3. The age-specific prevalence (points) and number of cases (bar) of asthma in 2019, by income .....</b>                                                                      | <b>47</b> |
| <b>Table S7. The estimated numbers of people with current wheezing, ever wheezing, current asthma and ever asthma in HICs, LMICs and worldwide in 2019, by age group and sex .....</b>   | <b>48</b> |
| <b>Table S8. Estimated numbers of people with current wheezing or ever asthma in World Bank income and World Health Organization combined regions in 2019, by age group .....</b>        | <b>53</b> |
| <b>Table S9. Estimated prevalence and number of people aged 0-79 years living with current wheezing or ever asthma in 201 countries and territories in 2019 .....</b>                    | <b>55</b> |
| <b>Table S10. Pooled odds ratios of associated factors of current wheezing and ever asthma by World Bank region .....</b>                                                                | <b>63</b> |
| <b>Additional notes on associated factors of asthma .....</b>                                                                                                                            | <b>67</b> |
| <b>References .....</b>                                                                                                                                                                  | <b>68</b> |

## Appendix 1. Searches, world regions, countries and territories

**Table S1. Search strategy to identify studies reporting the prevalence of asthma in the general population**

| <b>Medline (n=7,877)</b>                                                                                                                                    |                                                                                                                                                                                                                                                                                                               |
|-------------------------------------------------------------------------------------------------------------------------------------------------------------|---------------------------------------------------------------------------------------------------------------------------------------------------------------------------------------------------------------------------------------------------------------------------------------------------------------|
| 1                                                                                                                                                           | exp asthma/ or exp asthma, aspirin-induced/ or exp asthma, exercise-induced/ or exp asthma, occupational/ or exp status asthmaticus/ or *bronchial hyperreactivity/ or *bronchial spasm/                                                                                                                      |
| 2                                                                                                                                                           | exp morbidity/ or exp incidence/ or exp prevalence/ or *mortality/                                                                                                                                                                                                                                            |
| 3                                                                                                                                                           | *risk factors/                                                                                                                                                                                                                                                                                                |
| 4                                                                                                                                                           | (burden adj3 disease).mp. [mp=title, abstract, original title, name of substance word, subject heading word, floating sub-heading word, keyword heading word, organism supplementary concept word, protocol supplementary concept word, rare disease supplementary concept word, unique identifier, synonyms] |
| 5                                                                                                                                                           | 2 or 3 or 4                                                                                                                                                                                                                                                                                                   |
| 6                                                                                                                                                           | 1 and 5                                                                                                                                                                                                                                                                                                       |
| 7                                                                                                                                                           | limit 6 to (humans and yr="1990 -Current")                                                                                                                                                                                                                                                                    |
| <b>EMBASE (n= 10,044)</b>                                                                                                                                   |                                                                                                                                                                                                                                                                                                               |
| 1                                                                                                                                                           | exp asthma/ or exp wheezing/                                                                                                                                                                                                                                                                                  |
| 2                                                                                                                                                           | exp prevalence/ or *epidemiology/                                                                                                                                                                                                                                                                             |
| 3                                                                                                                                                           | exp morbidity/ or exp mortality/                                                                                                                                                                                                                                                                              |
| 4                                                                                                                                                           | (burden adj3 disease).mp. [mp=title, abstract, original title, name of substance word, subject heading word, floating sub-heading word, keyword heading word, organism supplementary concept word, protocol supplementary concept word, rare disease supplementary concept word, unique identifier, synonyms] |
| 5                                                                                                                                                           | 2 or 3 or 4                                                                                                                                                                                                                                                                                                   |
| 6                                                                                                                                                           | 1 and 5                                                                                                                                                                                                                                                                                                       |
| 7                                                                                                                                                           | limit 6 to (humans and yr="1990 -Current")                                                                                                                                                                                                                                                                    |
| <b>Global Health (n=4,451)</b>                                                                                                                              |                                                                                                                                                                                                                                                                                                               |
| 1                                                                                                                                                           | exp epidemiology/ or exp morbidity/ or exp mortality/                                                                                                                                                                                                                                                         |
| 2                                                                                                                                                           | exp risk factors/                                                                                                                                                                                                                                                                                             |
| 3                                                                                                                                                           | exp asthma/                                                                                                                                                                                                                                                                                                   |
| 4                                                                                                                                                           | exp wheezing/                                                                                                                                                                                                                                                                                                 |
| 5                                                                                                                                                           | 1 or 2                                                                                                                                                                                                                                                                                                        |
| 6                                                                                                                                                           | 3 or 4                                                                                                                                                                                                                                                                                                        |
| 7                                                                                                                                                           | 7 and 8                                                                                                                                                                                                                                                                                                       |
| 8                                                                                                                                                           | limit 7 to yr="1990 -Current"                                                                                                                                                                                                                                                                                 |
| <b>CINAHL (n=3,491)</b>                                                                                                                                     |                                                                                                                                                                                                                                                                                                               |
| (MM asthma* OR MM wheezing*) AND ((MM "Prevalence") OR (MM "Epidemiology") OR (MH "Morbidity+") OR (MH "Mortality+")) Limiters: Publication Year: 1990-2019 |                                                                                                                                                                                                                                                                                                               |

**Table S2. Country or territory list in World Health Organization and World Bank regions**

### High-income countries (HIC)

|                                                      |                                                                                                                                                                                                                                                                                                                                                                                                                                                                                                                                                                                         |
|------------------------------------------------------|-----------------------------------------------------------------------------------------------------------------------------------------------------------------------------------------------------------------------------------------------------------------------------------------------------------------------------------------------------------------------------------------------------------------------------------------------------------------------------------------------------------------------------------------------------------------------------------------|
| Region of the Americas (AMR)                         | Antigua and Barbuda, Aruba, Bahamas, Barbados, Curaçao, Guadeloupe, Martinique, Puerto Rico, Trinidad and Tobago, United States Virgin Islands, Argentina, Chile, French Guiana, Uruguay, Canada, United States of America                                                                                                                                                                                                                                                                                                                                                              |
| European Region (EUR)                                | Cyprus, Israel, Czechia, Hungary, Poland, Slovakia, Channel Islands, Denmark, Estonia, Finland, Iceland, Ireland, Latvia, Lithuania, Norway, Sweden, United Kingdom, Croatia, Greece, Italy, Malta, Portugal, Slovenia, Spain, Austria, Belgium, France, Germany, Luxembourg, Netherlands, Switzerland                                                                                                                                                                                                                                                                                  |
| Eastern Mediterranean Region (EMR)                   | Bahrain, Kuwait, Oman, Qatar, Saudi Arabia, State of Palestine, United Arab Emirates                                                                                                                                                                                                                                                                                                                                                                                                                                                                                                    |
| Western Pacific Region (WPR)                         | China Hong Kong SAR, China Macao SAR, China Taiwan Province, Japan, Republic of Korea, Brunei Darussalam, Singapore, Australia, New Zealand, New Caledonia, Guam                                                                                                                                                                                                                                                                                                                                                                                                                        |
| <b>Low-income and middle-income countries (LMIC)</b> |                                                                                                                                                                                                                                                                                                                                                                                                                                                                                                                                                                                         |
| African Region (AFR)*                                | Burundi, Comoros, Eritrea, Ethiopia, Kenya, Madagascar, Malawi, Mauritius, Mayotte, Mozambique, Réunion, Rwanda, South Sudan, Uganda, United Republic of Tanzania, Zambia, Zimbabwe, Angola, Cameroon, Central African Republic, Chad, Congo, Democratic Republic of the Congo, Equatorial Guinea, Gabon, Sao Tome and Principe, Algeria, Western Sahara, Botswana, Lesotho, Namibia, South Africa, Swaziland, Benin, Burkina Faso, Cabo Verde, Côte d'Ivoire, Gambia, Ghana, Guinea, GuineaBissau, Liberia, Mali, Mauritania, Niger, Nigeria, Senegal, Seychelles*, Sierra Leone, Togo |
| Region of the Americas (AMR)                         | Cuba, Dominican Republic, Grenada, Haiti, Jamaica, Saint Lucia, Saint Vincent and the Grenadines, Belize, Costa Rica, El Salvador, Guatemala, Honduras, Mexico, Nicaragua, Panama, Bolivia (Plurinational State of), Brazil, Colombia, Ecuador, Guyana, Paraguay, Peru, Suriname, Venezuela (Bolivarian Republic of)                                                                                                                                                                                                                                                                    |
| South-East Asia Region (SEAR)                        | Dem. People's Republic of Korea, Bangladesh, Bhutan, India, Maldives, Nepal, Sri Lanka, Indonesia, Myanmar, Thailand, Timor-Leste                                                                                                                                                                                                                                                                                                                                                                                                                                                       |
| European Region (EUR)                                | Kazakhstan, Kyrgyzstan, Tajikistan, Turkmenistan, Uzbekistan, Armenia, Azerbaijan, Georgia, Turkey, Belarus, Bulgaria, Republic of Moldova, Romania, Russian Federation, Ukraine, Albania, Bosnia and Herzegovina, Montenegro, Serbia, TFYR Macedonia                                                                                                                                                                                                                                                                                                                                   |
| Eastern Mediterranean Region (EMR)                   | Djibouti, Somalia, Egypt, Libya, Morocco, Sudan, Tunisia, Afghanistan, Iran (Islamic Republic of), Pakistan, Iraq, Jordan, Lebanon, Syrian Arab Republic, Yemen                                                                                                                                                                                                                                                                                                                                                                                                                         |
| Western Pacific Region (WPR)                         | China, Mongolia, Cambodia, Lao People's Democratic Republic, Malaysia, Philippines, Viet Nam, Fiji, Papua New Guinea, Solomon Islands, Vanuatu, Kiribati, Micronesia (Fed. States of), French Polynesia, Samoa, Tonga                                                                                                                                                                                                                                                                                                                                                                   |

## Appendix 2. eMethods: Detailed description of the global, regional and national estimation of asthma prevalence

This section is a supplement to the Methods part in the main text.

According to our systematic review and data extraction approach, multiple data points (agespecific or sex-specific prevalence) were extracted from the same individual articles. To account for the clustering of multiple data points from the same article, and multiple articles from the same country, we used a multilevel multivariable mixed-effects meta-regression and took study and country identification as the random-effects. Given that the prevalence of asthma

= number of asthma cases/number of participants, we stabilized the prevalence with the logit link as follows:

$$\text{prevalence of asthma} = P = (\text{asthma cases})/(\text{sample size})$$

$$\text{logit}(P) = \ln(P/[1 - P]) = \ln(\text{odds}) = \alpha + \beta_1 * x_1 + \beta_2 * x_2 + \dots + u_i$$

where  $\alpha$  is the intercept term,  $\beta$  is coefficient, and  $x$  is variable.

First, we assessed the age- and sex-adjusted effects of cluster-level variables  $x_1 - x_n$ , namely year of investigation, WB income region, setting (urban, rural and mixed) stratified by WB region, WHO region, and SDI by WB region (see **Table S3** for more details). For current wheezing, we found that the prevalence significantly correlated with age, was higher in males (than in females), urban areas in LMICs (than in rural areas in HICs), AMR and EMR (than in WPR). For ever wheezing, we found that it was associated with age, more common in males (than in females) and in AMR (than in WPR). In LMICs, the prevalence of ever wheezing was higher in rural areas than in urban settings, decreased with higher SDI; while in HICs, the prevalence of ever wheezing increased with higher SDI. For current asthma, the prevalence significantly correlated with age, was higher in males, increased over time. In HICs, current asthma was more common in urban areas (than in rural areas), and increased with higher SDI. Similarly, the prevalence of ever asthma was significantly associated with age, higher in males (than in females), in SEAR, EUR and EMR (than in WPR). In both HICs and LMICs, ever asthma was more common in urban areas than in rural areas. At higher SDIs, the prevalence of ever asthma increased in HICs, but decreased in LMICs.

Based on the abovementioned explorations, we fitted a multilevel multivariable mixed-effects meta-regression, with age, sex and calendar year as fixed-effect variables and with study and country identification as the random-effect ( $\mu_i$ ). The nonlinear relation between age and asthma prevalence was modelled using a restricted cubic spline, with knots being selected by visual inspection at the inflection points of the curve. The sex-specific relation of age and asthma prevalence is demonstrated in **Figure S2**. Based on data points from all included articles, we constructed four models for generating the prevalence of current wheezing, ever wheezing, current asthma and ever asthma. Those models were constructed separately for HICs and LMICs.

$$\text{logit}(P) = \alpha + \beta_1 * \text{Age}_1 + \beta_2 * \text{Age}_2 + \beta_3 * \text{Age}_3 + \beta_4 * \text{Age}_4 + \beta_5 * \text{Female proportion} + \beta_6 * \text{Investigation year} + \beta_6 * \text{WB} + u_i$$

then,

$$e^{\alpha + \beta_1 * \text{Age}_1 + \beta_2 * \text{Age}_2 + \beta_3 * \text{Age}_3 + \beta_4 * \text{Age}_4 + \beta_5 * \text{Female proportion} + \beta_6 * \text{Investigation year} + \beta_6 * \text{WB} + u_i}$$

---


$$P = 1 + e^{\alpha + \beta_1 * \text{Age}_1 + \beta_2 * \text{Age}_2 + \beta_3 * \text{Age}_3 + \beta_4 * \text{Age}_4 + \beta_5 * \text{Female proportion} + \beta_6 * \text{Investigation year} + \beta_6 * \text{WB} + u_i}$$

Where  $\text{Age}_1 - \text{Age}_4$  are variables generated in the process of fitting cubic splines;  $\text{WB}$  refers to income regions of HICs and LMICs, and  $u_i$  represents the variance of random-effects.

Based on the above models (**Table S4**), the age- and sex- prevalence of current wheezing, ever wheezing, current asthma and ever asthma in HICs, LMICs and worldwide for the year 2019 was estimated (**Table 1** in the maintext).

### **Statistical step two: Estimation of the global numbers of people with asthma in 2019**

The numbers of people aged 5-69 years who were affected by of current wheezing, ever wheezing, current asthma and ever asthma were established by applying the estimated age-, sex-prevalence

to the corresponding demographic data in 2019 (**Table S7**). The overall cases of current wheezing and ever asthma in HICs and LMICs were called “current wheezing HIC envelope”, “current wheezing LMIC envelope”, “ever asthma HIC envelope” and “ever asthma LMIC envelope” respectively, and were used as the bases for the following regional and national estimations of current wheezing and ever asthma cases.

### Statistical step three: Estimation of the regional numbers of people with current wheezing or ever asthma in 2019

We used a “risk factor-based model” distributing the global cases of current wheezing and ever asthma into ten WB-WHO regions (**Table S8**).

$$N_{WHO-WB\ region} = (Pop_{WHO-WB\ region}) * (Prev_{asthmaHIC/LMIC}) * (1 + \sum_{RF_n} [(Prev_{RF_{WHO-WB\ region}} - Prev_{RF_{HIC/LMIC}}) * (OR_{RF_{HIC/LMIC}} - 1)])_{RF_1}$$

Where  $N_{WHO-WB\ region}$  refers to the cases of current wheezing or ever asthma in each of the ten WHO-WB regions,  $Pop_{WHO-WB\ region}$  is the age- and sex-specific de-facto population of people in 2019 in each WHO-WB region,  $Prev_{asthmaHIC/LMIC}$  indicates the estimated age- and sex-specific prevalence of current wheezing or ever asthma in 2019 in HICs or LMICs where the corresponding WHO-WB region belongs.  $RF_1-RF_n$  are the selected risk factors. Current smoking and biomass exposure were included in the model for current wheezing, while rural setting, current smoking, biomass exposure and SDI were included in the model for ever asthma. The percentage of population residing in rural areas in 2020 was obtained from UNPD.(1) The prevalence of current smoking in 2018, the proportion of population with primary reliance on polluting fuels and technologies for cooking in 2018 were obtained from the WHO Global Health Observatory data repository;(2) SDI in 2019 was obtained from the GBD 2019 Study.(3)

$Prev_{RF_{WHO-WB\ region}}$  is the prevalence of selected risk factors in each WHO-WB region and  $Prev_{RF_{HIC/LMIC}}$  is the prevalence of selected risk factors in HICs or LMICs where this WHO-WB region stands.  $OR_{RF_{HIC/LMIC}}$  is the estimated/synthesized OR of a specific risk factor in HICs or LMICs where the selected WHO-WB region locates.

Finally, the regional cases of current wheezing and ever asthma were adjusted by multiplying an “adjustment index” to make sure that the sum of regional cases exactly fitted the “current wheezing HIC envelope”, “current wheezing LMIC envelope”, “ever asthma HIC envelope” and “ever asthma LMIC envelope”. The regional prevalence of current wheezing and ever asthma was respectively calculated by dividing the estimated numbers of people with current wheezing and ever asthma by the corresponding population in each region in 2019.

### Statistical step four: Estimation of the national numbers of people with current wheezing or ever asthma

Similarly, the national numbers of people with current wheezing and ever asthma were estimated with the below formula (**Table S9**):

$$N_{country} = Pop_{country} * (Prev_{asthmaHIC/LMIC}) * (1 + \sum_{RF_n} [(Prev_{RF_{country}} - Prev_{RF_{WHO-WB\ region}}) * (OR_{RF_{HIC/LMIC}} - 1)])_{RF_1}$$

Where  $N_{country}$  is the cases of current wheezing or ever asthma, and  $Pop_{country}$  is the de-facto population size in 201 countries and territories in 2019.  $Prev_{asthmaHIC/LMIC}$  indicates the prevalence of current wheezing or ever asthma in HICs or LMICs where the target country belongs.  $RF_1-RF_n$

are the same risk factors adopted in the regional case estimations for current wheezing or ever asthma.  $Prev_{RFcountry}$  and  $Prev_{RFWHO-WB\ region}$  are the prevalence rates of risk factors in each country and territory and in its corresponding WHO-WB region.  $OR_{RFHIC/LMIC}$  is the estimated OR of the selected risk factors in HIC or LMIC.

Finally, the national cases of current wheezing and ever asthma were also adjusted by multiplying an “adjustment index” to make sure that the sum of national cases equalled to the abovementioned WHO-WB “envelopes”. The national prevalence of current wheezing and ever asthma was generated by dividing the estimated cases of current wheezing and ever asthma by the corresponding national population in 2019.

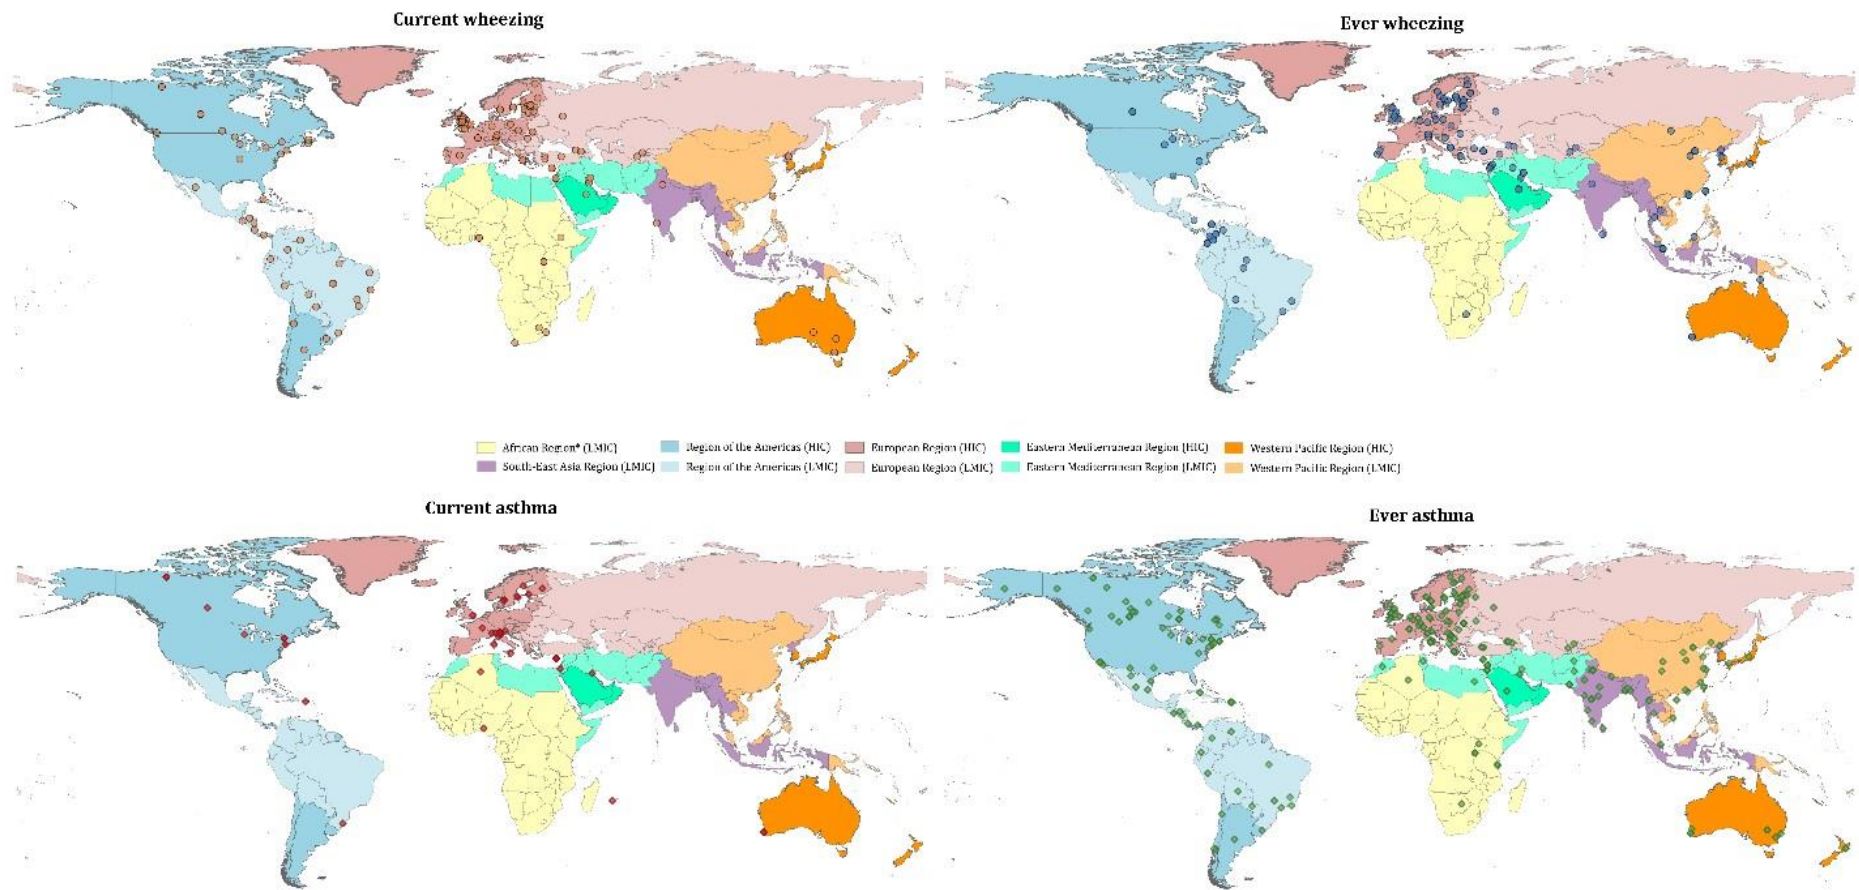

**Figure S1. Contribution of data sources across world regions**

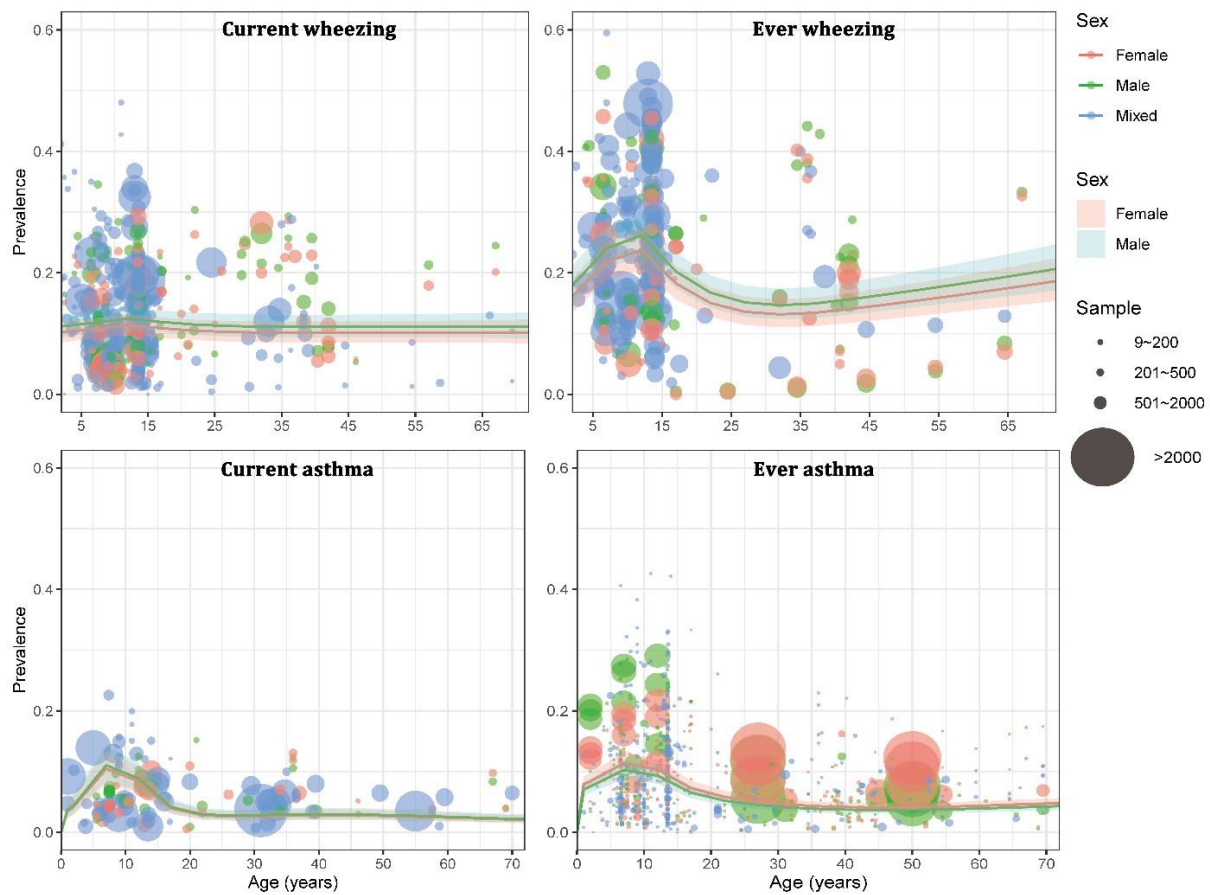

**Figure S2. The prevalence of current wheezing, ever wheezing, current asthma and ever asthma, by age and sex group, based on contributing datapoints from included articles**

**Table S3. The age- and sex-adjusted effects of study-level variables on current wheezing, ever wheezing, current asthma and ever asthma**

| Variable                                      | No. of articles | No. of data points | $\beta$ (95% CI)           | P-value |
|-----------------------------------------------|-----------------|--------------------|----------------------------|---------|
| <b>Current wheezing</b>                       |                 |                    |                            |         |
| <b>Age</b>                                    |                 |                    |                            |         |
| Age <sub>1</sub>                              | 146             | 449                | 0.012 ([-0.011]-0.035)     | 0.3070  |
| Age <sub>2</sub>                              | 146             | 449                | 0.086 ([-0.433]-0.604)     | 0.7459  |
| Age <sub>3</sub>                              | 146             | 449                | -0.839 ([-2.419]-0.741)    | 0.2979  |
| Age <sub>4</sub>                              | 146             | 449                | 5.920 ([0.072]-11.769)     | 0.0472  |
| <b>Female proportion</b>                      | 146             | 449                | -0.102 ([-0.121]-[-0.084]) | <.0001  |
| <b>Sex#</b>                                   |                 |                    |                            |         |
| Male                                          | 59              | 91                 |                            |         |
| Female                                        | 59              | 90                 | -0.106 ([-0.124]-[-0.087]) | <.0001  |
| <b>Investigation year (per year increase)</b> | 146             | 446                | 0.006 (0.003-0.009)        | 0.0002  |
| <b>WB income region</b>                       |                 |                    |                            |         |
| HICs                                          | 94              | 261                |                            |         |
| LMICs                                         | 58              | 188                | -0.052 ([-0.383]-0.279)    | 0.7586  |



| <b>Setting by WB</b>               |            |     |     |                            |        |
|------------------------------------|------------|-----|-----|----------------------------|--------|
| Overall                            | Urban      | 93  | 253 |                            |        |
|                                    | Rural      | 31  | 69  | -0.099 ([-0.158]-[-0.039]) | 0.0011 |
|                                    | Urban HICs | 54  | 143 |                            |        |
|                                    | Rural      | 17  | 33  | -0.051 ([-0.134]-0.032)    | 0.2244 |
| LMICs                              | Urban      | 41  | 110 |                            |        |
|                                    | Rural      | 15  | 36  | -0.144 ([-0.229]-[-0.060]) | 0.0008 |
| <b>WHO region</b>                  |            |     |     |                            |        |
|                                    | WPR        | 26  | 75  |                            |        |
|                                    | AFR        | 11  | 38  | 0.227 ([-0.405]-0.858)     | 0.4821 |
|                                    | AMR        | 38  | 113 | 0.631 (0.086-1.175)        | 0.0232 |
|                                    | SEAR       | 8   | 16  | 0.174 ([-0.581]-0.928)     | 0.6519 |
|                                    | EUR        | 55  | 178 | 0.250 ([-0.198]-0.699)     | 0.2739 |
|                                    | EMR        | 10  | 29  | 0.739 (0.136-1.342)        | 0.0163 |
| <b>SDI by WB (per 1% increase)</b> |            |     |     |                            |        |
| Overall                            | SDI        | 146 | 470 | 0.002 ([-0.401]-0.008)     | 0.5096 |
| HICs                               | SDI        | 93  | 270 | 0.003 ([-0.004]-0.010)     | 0.4125 |
| LMICs                              | SDI        | 58  | 200 | 0.003 ([-0.013]-0.020)     | 0.6878 |

### Ever wheezing

| <b>Age</b>              |                                               |    |     |                            |        |
|-------------------------|-----------------------------------------------|----|-----|----------------------------|--------|
|                         | Age <sub>1</sub>                              | 89 | 268 | 0.075 ([0.057]-0.094)      | <.0001 |
|                         | Age <sub>2</sub>                              | 89 | 268 | -1.716 ([-2.322]-[-1.111]) | <.0001 |
|                         | Age <sub>3</sub>                              | 89 | 268 | 2.463 (0.248-4.678)        | 0.0293 |
|                         | Age <sub>4</sub>                              | 89 | 268 | 13.347 (2.721-23.973)      | 0.0138 |
|                         | <b>Female proportion</b>                      | 89 | 268 | -0.127 ([-0.152]-[-0.102]) | <.0001 |
| <b>Sex#</b>             |                                               |    |     |                            |        |
|                         | Male                                          | 34 | 53  |                            |        |
|                         | Female                                        | 34 | 53  | -0.133 ([-0.158]-[-0.109]) | <.0001 |
|                         | <b>Investigation year (per year increase)</b> | 89 | 267 | 0.004 ([-0.001]-0.010)     | 0.1344 |
| <b>WB income region</b> |                                               |    |     |                            |        |

| Variable          | No. of articles | No. of data points | $\beta$ (95% CI)        | P-value                |        |
|-------------------|-----------------|--------------------|-------------------------|------------------------|--------|
| HICs              | 51              | 132                |                         |                        |        |
| LMICs             | 41              | 136                | -0.091 ([-0.451]-0.270) | 0.6216                 |        |
| <b>Setting</b>    |                 |                    |                         |                        |        |
| Overall           | Urban           | 61                 | 178                     |                        |        |
|                   | Rural           | 17                 | 42                      | 2.078 (1.909-2.246)    | <.0001 |
| HICs              | Urban           | 33                 | 90                      |                        |        |
|                   | Rural           | 7                  | 14                      | 0.040 ([-0.717]-0.797) | 0.9178 |
| LMICs             | Urban           | 30                 | 88                      |                        |        |
|                   | Rural           | 11                 | 28                      | 2.127 (1.958-2.295)    | <.0001 |
| <b>WHO region</b> |                 |                    |                         |                        |        |
|                   | WPR             | 21                 | 62                      |                        |        |
|                   | AFR             | 4                  | 6                       | 0.846 ([-0.275]-1.967) | 0.1390 |
|                   | AMR             | 20                 | 61                      | 0.835 ([0.282]-1.389)  | 0.0031 |
|                   | SEAR            | 6                  | 11                      | 0.133 ([-0.590]-0.856) | 0.7184 |

|                                               |                          |    |     |                               |        |
|-----------------------------------------------|--------------------------|----|-----|-------------------------------|--------|
|                                               | EUR                      | 31 | 104 | 0.374 ([-0.083]-0.831)        | 0.1091 |
|                                               | EMR                      | 8  | 24  | 0.551 ([-0.049]-1.151)        | 0.0720 |
| <b>SDI by WB</b>                              | <b>(per 1% increase)</b> |    |     |                               |        |
| Overall                                       | SDI                      | 89 | 267 | 0.005 ([-0.004]-0.013)        | 0.2650 |
| HICs                                          | SDI                      | 51 | 131 | 0.024 (0.013-0.035)           | <.0001 |
| LMICs                                         | SDI                      | 41 | 136 | -0.017 ([-0.032]-[-0.001])    | 0.0347 |
| <b>Current asthma</b>                         |                          |    |     |                               |        |
| <b>Age</b>                                    |                          |    |     |                               |        |
|                                               | Age1                     | 50 | 128 | 0.200 (0.141-0.259)           | <.0001 |
|                                               | Age2                     | 50 | 128 | -18.682 ([-22.497]-[-14.868]) | <.0001 |
|                                               | Age3                     | 50 | 128 | 40.203 (32.228-48.178)        | <.0001 |
|                                               | Age4                     | 50 | 128 | -22.339 ([-26.623]-[-18.056]) | <.0001 |
| <b>Female proportion</b>                      |                          | 50 | 128 | -0.059 ([-0.111]-[-0.008])    | 0.0249 |
| <b>Sex#</b>                                   |                          |    |     |                               |        |
|                                               | Male                     | 20 | 32  |                               |        |
|                                               | Female                   | 20 | 32  | -0.066 ([-0.118]-[-0.014])    | 0.0122 |
| <b>Investigation year (per year increase)</b> |                          | 50 | 126 | 0.021 (0.015-0.027)           | <.0001 |
| <b>WB income region</b>                       |                          |    |     |                               |        |
|                                               | HICs                     | 40 | 105 |                               |        |
|                                               | LMICs                    | 11 | 23  | -0.040 ([-0.700]-0.619)       | 0.9043 |
| <b>Setting</b>                                |                          |    |     |                               |        |
| Overall                                       | Urban                    | 32 | 72  |                               |        |
|                                               | Rural                    | 9  | 21  | -0.175 ([-0.321]-[-0.029])    | 0.0189 |
| HICs                                          | Urban                    | 23 | 53  |                               |        |
|                                               | Rural                    | 8  | 18  | -0.156 ([-0.303]-[-0.009])    | 0.0380 |
| LMICs                                         | Urban                    | 9  | 19  |                               |        |
|                                               | Rural                    | 1  | 3   | -1.360 ([-3.096]-0.376)       | 0.1248 |
| <b>WHO region</b>                             |                          |    |     |                               |        |
|                                               | WPR                      | 6  | 15  |                               |        |
|                                               | AFR                      | 3  | 9   | -0.673 ([-1.846]-0.500)       | 0.2605 |
|                                               | AMR                      | 13 | 25  | 0.089 ([-0.716]-0.895)        | 0.8278 |
|                                               | SEAR                     | 1  | 1   | -1.212 ([-2.922]-0.498)       | 0.1649 |
|                                               | EUR                      | 26 | 74  | -0.622 ([-1.423]-0.179)       | 0.1278 |

| Variable                           | No. of articles                        | No. of data points | $\beta$ (95% CI)       | P-value                    |        |
|------------------------------------|----------------------------------------|--------------------|------------------------|----------------------------|--------|
| EMR                                | 2                                      | 4                  | 0.774 ([-0.548]-2.095) | 0.2511                     |        |
| <b>SDI by WB (per 1% increase)</b> |                                        |                    |                        |                            |        |
| Overall                            | SDI                                    | 50                 | 128                    | 0.047 (0.030-0.063)        | <.0001 |
| HICs                               | SDI                                    | 40                 | 105                    | 0.059 (0.040-0.077)        | <.0001 |
| LMICs                              | SDI                                    | 11                 | 23                     | 0.055 ([-0.027]-0.136)     | 0.1910 |
| <b>Ever asthma</b>                 |                                        |                    |                        |                            |        |
| <b>Age</b>                         |                                        |                    |                        |                            |        |
|                                    | Age <sub>1</sub>                       | 189                | 776                    | 0.068 (0.068-0.069)        | <.0001 |
|                                    | Age <sub>2</sub>                       | 189                | 776                    | -7.098 ([-7.172]-[-7.024]) | <.0001 |
|                                    | Age <sub>3</sub>                       | 189                | 776                    | 13.623 (13.469-13.777)     | <.0001 |
|                                    | Age <sub>4</sub>                       | 189                | 776                    | -6.822 ([-6.913]-[-6.731]) | <.0001 |
|                                    | Female proportion                      | 189                | 776                    | 0.114 (0.112-0.116)        | <.0001 |
| <b>Sex#</b>                        |                                        |                    |                        |                            |        |
|                                    | Male                                   | 77                 | 188                    |                            |        |
|                                    | Female                                 | 77                 | 188                    | 0.114 (0.112-0.116)        | <.0001 |
|                                    | Investigation year (per year increase) | 188                | 768                    | 0.054 (0.053-0.054)        | <.0001 |
| <b>WB income region</b>            |                                        |                    |                        |                            |        |
|                                    | HICs                                   | 120                | 425                    |                            |        |
|                                    | LMICs                                  | 74                 | 351                    | -0.242 ([-0.567]-0.082)    | 0.1436 |
| <b>Setting</b>                     |                                        |                    |                        |                            |        |
| Overall                            | Urban                                  | 122                | 429                    |                            |        |
|                                    | Rural                                  | 37                 | 92                     | -0.174 ([-0.229]-[-0.119]) | <.0001 |
| HICs                               | Urban                                  | 71                 | 258                    |                            |        |
|                                    | Rural                                  | 16                 | 29                     | -0.132 ([-0.225]-[-0.039]) | 0.0055 |
| LMICs                              | Urban                                  | 53                 | 171                    |                            |        |
|                                    | Rural                                  | 22                 | 63                     | -0.279 ([-0.348]-[-0.210]) | <.0001 |
| <b>WHO region</b>                  |                                        |                    |                        |                            |        |
|                                    | WPR                                    | 34                 | 129                    |                            |        |
|                                    | AFR                                    | 11                 | 47                     | 0.485 ([-0.274]-1.244)     | 0.2106 |
|                                    | AMR                                    | 52                 | 191                    | -0.292 ([-0.686]-0.102)    | 0.1460 |
|                                    | SEAR                                   | 11                 | 73                     | 1.327 (0.917-1.738)        | <.0001 |
|                                    | EUR                                    | 72                 | 296                    | 0.523 (0.133-0.913)        | 0.0086 |
|                                    | EMR                                    | 14                 | 40                     | 1.010 (0.619-1.400)        | <.0001 |
| <b>SDI by WB (per 1% increase)</b> |                                        |                    |                        |                            |        |
| Overall                            | SDI                                    | 188                | 768                    | 0.157 (0.156-0.158)        | <.0001 |
| HICs                               | SDI                                    | 119                | 417                    | 0.157 (0.156-0.158)        | <.0001 |
| LMICs                              | SDI                                    | 74                 | 351                    | -0.019 ([-0.033]-[-0.005]) | 0.0082 |

Note: Age<sub>1</sub>-Age<sub>4</sub> were variables generated in the process of fitting cubic splines, and the knots were 4.5, 8.7, 13.0, 13.6, 40.4 years for current wheezing, 6, 10, 13.5, 13.9, 42.325 years for ever wheezing, 5.175, 9, 13, 32, 67 years for current asthma and 5.5, 9, 13.5, 24.9375, 64.5 years for ever asthma. #The effect of sex was

estimated based on studies where sex-specific prevalence was available.

### Appendix 3. Modelling the global prevalence of asthma

**Table S4. Models for constructing the prevalence of current wheezing, ever wheezing, current asthma and ever asthma**

| <b>asthma</b>                                  | $1 + e^{(-45.3451 + 0.1988 * Age_1 - 18.4582 * Age_2 + 39.6855 * Age_3 - 22.0276 * Age_4 - 0.0621 * female\ proportion + 0.0209 * Investigation\ year - 0.1346 * WBLMIC + u_i)}$ |
|------------------------------------------------|----------------------------------------------------------------------------------------------------------------------------------------------------------------------------------|
| <b>Ever asthma</b>                             | $e^{(-109.7344 + 0.0603 * Age_1 - 6.7893 * Age_2 + 13.077 * Age_3 - 6.5845 * Age_4 + 0.1207 * female\ proportion + 0.0536 * Investigation\ year - 0.5438 * WBLMIC + u_i)}$       |
| <b>asthma</b>                                  | $1 + e^{(-109.7344 + 0.0603 * Age_1 - 6.7893 * Age_2 + 13.077 * Age_3 - 6.5845 * Age_4 + 0.1207 * female\ proportion + 0.0536 * Investigation\ year - 0.5438 * WBLMIC + u_i)}$   |
| Category Model for constructing the prevalence |                                                                                                                                                                                  |
| <b>Current wheezing</b>                        | $e^{(-13.2772 + 0.01 * Age_1 + 0.1141 * Age_2 - 0.8725 * Age_3 + 5.6997 * Age_4 - 0.1024 * female\ proportion + 0.0056 * Investigation\ year - 0.0902 * WBLMIC + u_i)}$          |
| <b>Ever wheezing</b>                           | $1 + e^{(-13.2772 + 0.01 * Age_1 + 0.1141 * Age_2 - 0.8725 * Age_3 + 5.6997 * Age_4 - 0.1024 * female\ proportion + 0.0056 * Investigation\ year - 0.0902 * WBLMIC + u_i)}$      |
| <b>Current asthma</b>                          | $e^{(-10.8033 + 0.0738 * Age_1 - 1.6693 * Age_2 + 2.3376 * Age_3 + 13.5855 * Age_4 - 0.1266 * female\ proportion + 0.0046 * Investigation\ year - 0.1223 * WBLMIC + u_i)}$       |
| <b>Ever asthma</b>                             | $1 + e^{(-10.8033 + 0.0738 * Age_1 - 1.6693 * Age_2 + 2.3376 * Age_3 + 13.5855 * Age_4 - 0.1266 * female\ proportion + 0.0046 * Investigation\ year - 0.1223 * WBLMIC + u_i)}$   |
| <b>Current asthma</b>                          | $e^{(-45.3451 + 0.1988 * Age_1 - 18.4582 * Age_2 + 39.6855 * Age_3 - 22.0276 * Age_4 - 0.0621 * female\ proportion + 0.0209 * Investigation\ year - 0.1346 * WBLMIC + u_i)}$     |

Note: Age<sub>1</sub>-Age<sub>4</sub> were variables generated in the process of fitting cubic splines, and the knots were 4.5, 8.7, 13.0, 13.6, 40.4 years for current wheezing, 6, 10, 13.5, 13.9, 42.325 years for ever wheezing, 5.175, 9, 13, 32, 67 years for current asthma and 5.5, 9, 13.5, 24.9375, 64.5 years for ever asthma. u<sub>i</sub> was the variance of random effect.

## Appendix 4. Characteristics of the included studies

**Table S5. Characteristics of included studies with prevalence data for sample population**

| Author                  | Year Published | Country   | Study site                    | WHO Region | WB Income Region | Investigation Date  | Sampling Strategy               | Age range  | Group                  |
|-------------------------|----------------|-----------|-------------------------------|------------|------------------|---------------------|---------------------------------|------------|------------------------|
| Hedman J, et al.        | 1999           | Finland   | Päijät-Häme, Southern Finland | EUR        | HIC              | May 1996            | Random                          | 18-65      | Ever diagnosed asthma  |
| Salem, M. B., et al.    | 2002           | Iraq      | Basra, Southern Iraq          | EMR        | LMIC             | March-April 2001    | Random                          | 0-4        | Current wheezing       |
| Obaseki, D. O., et al.  | 2014           | Nigeria   | Ile-Ife, Southwest Nigeria    | AFR        | LMIC             | May-Dec 2011        | Stratified three-stage sampling | 15+        | Newly diagnosed asthma |
| Horak, E., et al.       | 2014           | Austria   | Innsbruck, Tyrol              | EUR        | HIC              | 2013                | Random                          | 7.5-8.5    | Current wheezing       |
| Anderson, H. R., et al. | 1994           | UK        | Croydon, London               | EUR        | HIC              | 1978-1991           | Random                          | NA         | Current wheezing       |
| Crain, E. F., et al.    | 1994           | US        | Bronx County, New York        | AMR        | HIC              | 1991                | Random                          | NA         | Ever diagnosed asthma  |
| Kirenga, B. J., et al.  | 2019           | Uganda    | National                      | AFR        | LMIC             | 2014                | Random                          | 12+        | Ever diagnosed asthma  |
| Seneviratne             | 2018           | Sri Lanka | Colombo Municipal Council     | SEAR       | LMIC             | May 2015 - Dec 2015 | Cluster sampling                | 3-5        | Ever wheezing          |
| Yawn                    | 2002           | US        | Rochester, Minnesota          | AMR        | HIC              | 36527               | Cluster                         | 5.3-22.1   | Ever diagnosed asthma  |
| Bjorksten               | 1998           | Sweden    | Linköping                     | EUR        | HIC              | 1998                | Random                          | 13-14; 6-7 | Ever wheezing          |
| Bjorksten               | 1998           | Sweden    | Stockholm/Uppsala             | EUR        | HIC              | 1998                | Random                          | 13-14; 6-8 | Ever wheezing          |
| Bjorksten               | 1998           | Finland   | Kuopio                        | EUR        | HIC              | 1998                | Random                          | 13-14; 6-9 | Ever wheezing          |

|           |      |         |         |     |     |      |        |             |               |
|-----------|------|---------|---------|-----|-----|------|--------|-------------|---------------|
| Bjorksten | 1998 | Finland | Lapland | EUR | HIC | 1998 | Random | 13-14; 6-10 | Ever wheezing |
|-----------|------|---------|---------|-----|-----|------|--------|-------------|---------------|

| Author    | Year Published | Country    | Study site         | WHO Region | WB Income Region | Investigation Date | Sampling Strategy | Age range   | Group         |
|-----------|----------------|------------|--------------------|------------|------------------|--------------------|-------------------|-------------|---------------|
| Bjorksten | 1998           | Finland    | Helsinki           | EUR        | HIC              | 1998               | Random            | 13-14; 6-11 | Ever wheezing |
| Bjorksten | 1998           | Finland    | Turku/Pori         | EUR        | HIC              | 1998               | Random            | 13-14; 6-12 | Ever wheezing |
| Bjorksten | 1998           | Estonia    | Tallinn            | EUR        | HIC              | 1998               | Random            | 13-14; 6-13 | Ever wheezing |
| Bjorksten | 1998           | Latvia     | Riga               | EUR        | HIC              | 1998               | Random            | 13-14; 6-14 | Ever wheezing |
| Bjorksten | 1998           | Latvia     | Rural              | EUR        | HIC              | 1998               | Random            | 13-14; 6-15 | Ever wheezing |
| Bjorksten | 1998           | Poland     | Krakow             | EUR        | HIC              | 1998               | Random            | 13-14; 6-16 | Ever wheezing |
| Bjorksten | 1998           | Poland     | Poznan             | EUR        | HIC              | 1998               | Random            | 13-14; 6-17 | Ever wheezing |
| Bjorksten | 1998           | Albania    | Tirané             | EUR        | LMIC             | 1998               | Random            | 13-14; 6-18 | Ever wheezing |
| Bjorksten | 1998           | Romania    | Cluj               | EUR        | LMIC             | 1998               | Random            | 13-14; 6-19 | Ever wheezing |
| Bjorksten | 1998           | Russia     | Moscow             | EUR        | LMIC             | 1998               | Random            | 13-14; 6-20 | Ever wheezing |
| Bjorksten | 1998           | Georgia    | Kutaisi            | EUR        | LMIC             | 1998               | Random            | 13-14; 6-21 | Ever wheezing |
| Bjorksten | 1998           | Georgia    | Tbilisi            | EUR        | LMIC             | 1998               | Random            | 13-14; 6-22 | Ever wheezing |
| Bjorksten | 1998           | Uzbekistan | Samarkand          | EUR        | LMIC             | 1998               | Random            | 13-14; 6-23 | Ever wheezing |
| Bjorksten | 1998           | Uzbekistan | Tashkent           | EUR        | LMIC             | 1998               | Random            | 13-14; 6-24 | Ever wheezing |
| Bjorksten | 1998           | Sweden     | Stockholm/upp sala | EUR        | HIC              | 1998               | Random            | 13-14; 6-25 | Ever wheezing |
| Bjorksten | 1998           | Estonia    | Tallinn            | EUR        | HIC              | 1998               | Random            | 13-14; 6-26 | Ever wheezing |
| Bjorksten | 1998           | Latvia     | Riga               | EUR        | HIC              | 1998               | Random            | 13-14; 6-27 | Ever wheezing |
| Bjorksten | 1998           | Poland     | Krakow             | EUR        | HIC              | 1998               | Random            | 13-14; 6-28 | Ever wheezing |
| Bjorksten | 1998           | Poland     | Poznan             | EUR        | HIC              | 1998               | Random            | 13-14; 6-29 | Ever wheezing |
| Bjorksten | 1998           | Georgia    | Kutaisi            | EUR        | LMIC             | 1998               | Random            | 13-14; 6-30 | Ever wheezing |
| Bjorksten | 1998           | Georgia    | Tbilisi            | EUR        | LMIC             | 1998               | Random            | 13-14; 6-31 | Ever wheezing |
| Bjorksten | 1998           | Albania    | Tirané             | EUR        | LMIC             | 1998               | Random            | 13-14; 6-32 | Ever wheezing |

|           |      |         |                    |     |     |      |        |             |                  |
|-----------|------|---------|--------------------|-----|-----|------|--------|-------------|------------------|
| Bjorksten | 1998 | Sweden  | Stockholm/upp sala | EUR | HIC | 1998 | Random | 13-14; 6-33 | Current wheezing |
| Bjorksten | 1998 | Estonia | Tallinn            | EUR | HIC | 1998 | Random | 13-14; 6-34 | Current wheezing |
| Bjorksten | 1998 | Latvia  | Rural              | EUR | HIC | 1998 | Random | 13-14; 6-35 | Current wheezing |
| Bjorksten | 1998 | Poland  | Krakow             | EUR | HIC | 1998 | Random | 13-14; 6-36 | Current wheezing |
| Bjorksten | 1998 | Poland  | Poznan             | EUR | HIC | 1998 | Random | 13-14; 6-37 | Current wheezing |

| Author    | Year Published | Country | Study site         | WHO Region | WB Income Region | Investigation Date | Sampling Strategy | Age range   | Group                 |
|-----------|----------------|---------|--------------------|------------|------------------|--------------------|-------------------|-------------|-----------------------|
| Bjorksten | 1998           | Georgia | Kutaisi            | EUR        | LMIC             | 1998               | Random            | 13-14; 6-38 | Current wheezing      |
| Bjorksten | 1998           | Georgia | Tbilisi            | EUR        | LMIC             | 1998               | Random            | 13-14; 6-39 | Current wheezing      |
| Bjorksten | 1998           | Albania | Tirané             | EUR        | LMIC             | 1998               | Random            | 13-14; 6-40 | Current wheezing      |
| Bjorksten | 1998           | Sweden  | Stockholm/upp sala | EUR        | HIC              | 1998               | Random            | 13-14; 6-41 | Ever diagnosed asthma |
| Bjorksten | 1998           | Estonia | Tallinn            | EUR        | HIC              | 1998               | Random            | 13-14; 6-42 | Ever diagnosed asthma |
| Bjorksten | 1998           | Latvia  | Rural              | EUR        | HIC              | 1998               | Random            | 13-14; 6-43 | Ever diagnosed asthma |
| Bjorksten | 1998           | Poland  | Krakow             | EUR        | HIC              | 1998               | Random            | 13-14; 6-44 | Ever diagnosed asthma |
| Bjorksten | 1998           | Poland  | Poznan             | EUR        | HIC              | 1998               | Random            | 13-14; 6-45 | Ever diagnosed asthma |
| Bjorksten | 1998           | Georgia | Kutaisi            | EUR        | LMIC             | 1998               | Random            | 13-14; 6-46 | Ever diagnosed asthma |
| Bjorksten | 1998           | Georgia | Tbilisi            | EUR        | LMIC             | 1998               | Random            | 13-14; 6-47 | Ever diagnosed asthma |
| Bjorksten | 1998           | Albania | Tirané             | EUR        | LMIC             | 1998               | Random            | 13-14; 6-48 | Ever diagnosed asthma |
| Bjorksten | 1998           | Sweden  | Stockholm/upp sala | EUR        | HIC              | 1998               | Random            | 13-14; 6-49 | Current wheezing      |
| Bjorksten | 1998           | Sweden  | Stockholm/upp sala | EUR        | HIC              | 1998               | Random            | 13-14; 6-50 | Current wheezing      |
| Bjorksten | 1998           | Finland | Kuopio             | EUR        | HIC              | 1998               | Random            | 13-14; 6-51 | Current wheezing      |
| Bjorksten | 1998           | Finland | Lapland            | EUR        | HIC              | 1998               | Random            | 13-14; 6-52 | Current wheezing      |
| Bjorksten | 1998           | Finland | Helsinki           | EUR        | HIC              | 1998               | Random            | 13-14; 6-53 | Current wheezing      |
| Bjorksten | 1998           | Finland | Turku/Pori         | EUR        | HIC              | 1998               | Random            | 13-14; 6-54 | Current wheezing      |
| Bjorksten | 1998           | Estonia | Tallinn            | EUR        | HIC              | 1998               | Random            | 13-14; 6-55 | Current wheezing      |

|           |      |         |         |     |      |      |        |             |                  |
|-----------|------|---------|---------|-----|------|------|--------|-------------|------------------|
| Bjorksten | 1998 | Latvia  | Riga    | EUR | HIC  | 1998 | Random | 13-14; 6-56 | Current wheezing |
| Bjorksten | 1998 | Latvia  | Rural   | EUR | HIC  | 1998 | Random | 13-14; 6-57 | Current wheezing |
| Bjorksten | 1998 | Poland  | Krakow  | EUR | HIC  | 1998 | Random | 13-14; 6-58 | Current wheezing |
| Bjorksten | 1998 | Poland  | Poznan  | EUR | HIC  | 1998 | Random | 13-14; 6-59 | Current wheezing |
| Bjorksten | 1998 | Albania | Tirané  | EUR | LMIC | 1998 | Random | 13-14; 6-60 | Current wheezing |
| Bjorksten | 1998 | Romania | Cluj    | EUR | LMIC | 1998 | Random | 13-14; 6-61 | Current wheezing |
| Bjorksten | 1998 | Russia  | Moscow  | EUR | LMIC | 1998 | Random | 13-14; 6-62 | Current wheezing |
| Bjorksten | 1998 | Georgia | Kutaisi | EUR | LMIC | 1998 | Random | 13-14; 6-63 | Current wheezing |

| Author    | Year Published | Country    | Study site         | WHO Region | WB Income Region | Investigation Date | Sampling Strategy | Age range   | Group                 |
|-----------|----------------|------------|--------------------|------------|------------------|--------------------|-------------------|-------------|-----------------------|
| Bjorksten | 1998           | Georgia    | Tbilisi            | EUR        | LMIC             | 1998               | Random            | 13-14; 6-64 | Current wheezing      |
| Bjorksten | 1998           | Uzbekistan | Samarkand          | EUR        | LMIC             | 1998               | Random            | 13-14; 6-65 | Current wheezing      |
| Bjorksten | 1998           | Uzbekistan | Tashkent           | EUR        | LMIC             | 1998               | Random            | 13-14; 6-66 | Current wheezing      |
| Bjorksten | 1998           | Sweden     | Stockholm/upp sala | EUR        | HIC              | 1998               | Random            | 13-14; 6-67 | Ever diagnosed asthma |
| Bjorksten | 1998           | Sweden     | Stockholm/upp sala | EUR        | HIC              | 1998               | Random            | 13-14; 6-68 | Ever diagnosed asthma |
| Bjorksten | 1998           | Finland    | Kuopio             | EUR        | HIC              | 1998               | Random            | 13-14; 6-69 | Ever diagnosed asthma |
| Bjorksten | 1998           | Finland    | Lapland            | EUR        | HIC              | 1998               | Random            | 13-14; 6-70 | Ever diagnosed asthma |
| Bjorksten | 1998           | Finland    | Helsinki           | EUR        | HIC              | 1998               | Random            | 13-14; 6-71 | Ever diagnosed asthma |
| Bjorksten | 1998           | Finland    | Turku/Pori         | EUR        | HIC              | 1998               | Random            | 13-14; 6-72 | Ever diagnosed asthma |
| Bjorksten | 1998           | Estonia    | Tallinn            | EUR        | HIC              | 1998               | Random            | 13-14; 6-73 | Ever diagnosed asthma |
| Bjorksten | 1998           | Latvia     | Riga               | EUR        | HIC              | 1998               | Random            | 13-14; 6-74 | Ever diagnosed asthma |
| Bjorksten | 1998           | Latvia     | Rural              | EUR        | HIC              | 1998               | Random            | 13-14; 6-75 | Ever diagnosed asthma |
| Bjorksten | 1998           | Poland     | Krakow             | EUR        | HIC              | 1998               | Random            | 13-14; 6-76 | Ever diagnosed asthma |
| Bjorksten | 1998           | Poland     | Poznan             | EUR        | HIC              | 1998               | Random            | 13-14; 6-77 | Ever diagnosed asthma |
| Bjorksten | 1998           | Albania    | Tirané             | EUR        | LMIC             | 1998               | Random            | 13-14; 6-78 | Ever diagnosed asthma |
| Bjorksten | 1998           | Romania    | Cluj               | EUR        | LMIC             | 1998               | Random            | 13-14; 6-79 | Ever diagnosed asthma |



|           |      |             |                                      |     |      |                     |        |             |                       |
|-----------|------|-------------|--------------------------------------|-----|------|---------------------|--------|-------------|-----------------------|
| Bjorksten | 1998 | Russia      | Moscow                               | EUR | LMIC | 1998                | Random | 13-14; 6-80 | Ever diagnosed asthma |
| Bjorksten | 1998 | Georgia     | Kutaisi                              | EUR | LMIC | 1998                | Random | 13-14; 6-81 | Ever diagnosed asthma |
| Bjorksten | 1998 | Georgia     | Tbilisi                              | EUR | LMIC | 1998                | Random | 13-14; 6-82 | Ever diagnosed asthma |
| Bjorksten | 1998 | Uzbekistan  | Samarkand                            | EUR | LMIC | 1998                | Random | 13-14; 6-83 | Ever diagnosed asthma |
| Bjorksten | 1998 | Uzbekistan  | Tashkent                             | EUR | LMIC | 1998                | Random | 13-14; 6-84 | Ever diagnosed asthma |
| Barry     | 1991 | New Zealand | Hastings & Borough of Havelock North | EUR | HIC  | Summer Months, 1991 | random | 12          | Ever diagnosed asthma |
| Barry     | 1991 | UK          | North Cardiff & Vale of Glamorgan    | EUR | HIC  | Summer Months, 1991 | random | 12          | Ever diagnosed asthma |
| Akkurt    | 2003 | Turkey      | Sivas, Anatonian                     | EUR | LMIC | 2003                | random | 20-107      | Current wheezing      |

| Author       | Year Published | Country      | Study site       | WHO Region | WB Income Region | Investigation Date            | Sampling Strategy | Age range     | Group                  |
|--------------|----------------|--------------|------------------|------------|------------------|-------------------------------|-------------------|---------------|------------------------|
| Isoaho       | 1994           | Finland      | Lieto            | EUR        | HIC              | October 1990<br>December 1991 | Random            | NA            | Newly diagnosed asthma |
| Papageorgiou | 1997           | Greece       | Athens           | EUR        | HIC              | 1997                          | random            | 20-44         | Ever wheezing          |
| Brozek       | 2015           | Poland       | Chorzow          | EUR        | HIC              | 1993                          | Clusterrandom     | 7-10          | Ever diagnosed asthma  |
| Bechtold     | 2013           | Italy        | Northeast Italy  | EUR        | HIC              | 2000-2004                     | Random            | 13            | Ever diagnosed asthma  |
| Nriagu       | 1999           | South Africa | Merebank, Durban | AFR        | LMIC             | 1999                          | Random            | 18+           | Current wheezing       |
| Anderson     | 2004           | UK           | British Isles    | EUR        | HIC              | 1995                          | Random            | 12-14         | Current wheezing       |
| Mallol       | 2010           | Brazil       | Latin America    | AMR        | LMIC             | 2005-2007                     | Random            | 13 -15 months | Current wheezing       |
| Mallol       | 2010           | Spain        | Europe           | EUR        | HIC              | 2005-2007                     | Random            | 13 -15 months | Current wheezing       |

|            |      |            |                                    |     |      |                            |                    |           |                       |
|------------|------|------------|------------------------------------|-----|------|----------------------------|--------------------|-----------|-----------------------|
| Johnson    | 2005 | US         | Detroit                            | AMR | HIC  | August 2001 - January 2002 | Random             | <18 - 70+ | Ever diagnosed asthma |
| Solis Soto | 2014 | Bolivia    | Oropeza                            | AMR | LMIC | July 2011 - December 2011  | One-staged cluster | 9-15      | Ever wheezing         |
| Mattei     | 2007 | Italy      | L'Aquila                           | EUR | HIC  | January-March 2004         | Random             | 13-14     | Ever diagnosed asthma |
| Lee        | 2001 | Korea, Rep | Seoul and Provincial center, Korea | WPR | HIC  | September-November 1995    | Stratified random  | 6-12      | Ever wheezing         |
| Lima       | 2012 | Brazil     | National                           | AMR | LMIC | July 2008 -                | NA                 | NA        | Current wheezing      |

| Author     | Year Published | Country      | Study site                      | WHO Region | WB Income Region | Investigation Date    | Sampling Strategy | Age range | Group                 |
|------------|----------------|--------------|---------------------------------|------------|------------------|-----------------------|-------------------|-----------|-----------------------|
| Hansen     | 2000           | Denmark      | Copenhagen                      | EUR        | HIC              | May 2009<br>1976-1978 | Random            | 20-35     | Ever diagnosed asthma |
| Fukutomi   | 2011           | Japan        | Fujieda                         | WPR        | HIC              | 1985-2006             | Random            | 15+       | Ever wheezing         |
| Al Ghobain | 2012           | Saudi Arabia | Riyadh                          | EMR        | HIC              | 2010                  | Two-stage cluster | 16-18     | Ever wheezing         |
| Kausel     | 2013           | Chile        | Region de los Rios and Valdivia | AMR        | HIC              | 2009                  | Random            | 10-16     | Ever diagnosed asthma |
| von Mutius | 1992           | Germany      | Leipzig                         | EUR        | HIC              | 1989-1991             | Random            | 9-11      | Ever diagnosed asthma |

|             |      |                 |                             |     |      |                                      |                      |       |                       |
|-------------|------|-----------------|-----------------------------|-----|------|--------------------------------------|----------------------|-------|-----------------------|
| Alves       | 1994 | Portugal        | Oporto                      | EUR | HIC  | 1992                                 | Random               | 20-44 | Current wheezing      |
| Liao        | 2005 | Taiwan          | Changhwa,<br>Central Taiwan | WPR | HIC  | September 2002<br>-<br>December 2002 | Stratified<br>Random | 6-8   | Ever wheezing         |
| Ehrlich     | 1995 | South<br>Africa | Cape Town                   | AFR | LMIC | 1993                                 | Cluster<br>sampling  | 7-8   | Current wheezing      |
| Arnedo-Pana | 2011 | Spain           | Bilbao                      | EUR | HIC  | 2002-<br>2003                        | Random               | 6-7   | Ever diagnosed asthma |
| Arnedo-Pana | 2011 | Spain           | Asturias                    | EUR | HIC  | 2002-<br>2003                        | Random               | 6-7   | Ever diagnosed asthma |
| Arnedo-Pana | 2011 | Spain           | San Sebastian               | EUR | HIC  | 2002-<br>2003                        | Random               | 6-7   | Ever diagnosed asthma |
| Arnedo-Pana | 2011 | Spain           | La Coruna                   | EUR | HIC  | 2002-<br>2003                        | Random               | 6-7   | Ever diagnosed asthma |
| Arnedo-Pana | 2011 | Spain           | Cartagena                   | EUR | HIC  | 2002-<br>2003                        | Random               | 6-7   | Ever diagnosed asthma |
| Arnedo-Pana | 2011 | Spain           | Barcelona                   | EUR | HIC  | 2002-<br>2003                        | Random               | 6-7   | Ever diagnosed asthma |
| Arnedo-Pana | 2011 | Spain           | Valencia                    | EUR | HIC  | 2002-<br>2003                        | Random               | 6-7   | Ever diagnosed asthma |

| Author      | Year<br>Published | Country | Study site    | WHO<br>Region | WB<br>Income<br>Region | Investig<br>ation<br>Date | Sampling<br>Strategy | Age range | Group                 |
|-------------|-------------------|---------|---------------|---------------|------------------------|---------------------------|----------------------|-----------|-----------------------|
| Arnedo-Pana | 2011              | Spain   | Madrid        | EUR           | HIC                    | 2002-<br>2003             | Random               | 6-7       | Ever diagnosed asthma |
| Arnedo-Pana | 2011              | Spain   | Bilbao        | EUR           | HIC                    | 2002-<br>2003             | Random               | 13-14     | Ever diagnosed asthma |
| Arnedo-Pana | 2011              | Spain   | Asturias      | EUR           | HIC                    | 2002-<br>2003             | Random               | 13-14     | Ever diagnosed asthma |
| Arnedo-Pana | 2011              | Spain   | San Sebastian | EUR           | HIC                    | 2002-<br>2003             | Random               | 13-14     | Ever diagnosed asthma |

|             |      |            |            |     |      |           |                         |       |                       |
|-------------|------|------------|------------|-----|------|-----------|-------------------------|-------|-----------------------|
| Arnedo-Pana | 2011 | Spain      | La Coruna  | EUR | HIC  | 2002-2003 | Random                  | 13-14 | Ever diagnosed asthma |
| Arnedo-Pana | 2011 | Spain      | Cartagena  | EUR | HIC  | 2002-2003 | Random                  | 13-14 | Ever diagnosed asthma |
| Arnedo-Pana | 2011 | Spain      | Barcelona  | EUR | HIC  | 2002-2003 | Random                  | 13-14 | Ever diagnosed asthma |
| Arnedo-Pana | 2011 | Spain      | Valencia   | EUR | HIC  | 2002-2003 | Random                  | 13-14 | Ever diagnosed asthma |
| Arnedo-Pana | 2011 | Spain      | Madrid     | EUR | HIC  | 2002-2003 | Random                  | 13-14 | Ever diagnosed asthma |
| Arnedo-Pana | 2011 | Spain      | Valladolid | EUR | HIC  | 2002-2003 | Random                  | 13-14 | Ever diagnosed asthma |
| Nugmanova   | 2018 | Ukraine    | Kiev       | EUR | LMIC | 2013-2015 | Two-step cluster random | 18+   | Ever diagnosed asthma |
| Nugmanova   | 2018 | Kazakhstan | Almaty     | EUR | LMIC | 2013-2015 | Two-step cluster random | 18+   | Ever diagnosed asthma |
| Nugmanova   | 2018 | Azerbaijan | Baku       | EUR | LMIC | 2013-2015 | Two-step cluster random | 18+   | Ever diagnosed asthma |
| Nugmanova   | 2018 | Ukraine    | Kiev       | EUR | LMIC | 2013-2015 | Two-step cluster random | 18+   | Ever wheezing         |
| Nugmanova   | 2018 | Kazakhstan | Almaty     | EUR | LMIC | 2013-2015 | Two-step cluster random | 18+   | Ever wheezing         |

| Author    | Year Published | Country    | Study site | WHO Region | WB Income Region | Investigation Date | Sampling Strategy       | Age range | Group                 |
|-----------|----------------|------------|------------|------------|------------------|--------------------|-------------------------|-----------|-----------------------|
| Nugmanova | 2018           | Azerbaijan | Baku       | EUR        | LMIC             | 2013-2015          | Two-step cluster random | 18+       | Ever wheezing         |
| Cazzola   | 2011           | Italy      | Italy      | EUR        | HIC              | 40148              | Random                  | 14+       | Ever diagnosed asthma |

|           |      |             |                          |     |      |                          |                   |       |                       |
|-----------|------|-------------|--------------------------|-----|------|--------------------------|-------------------|-------|-----------------------|
| Heinrich  | 2002 | Germany     | Sachsen-Anhalt           | EUR | HIC  | 1992-1993                | Random            | 5-14  | Ever diagnosed asthma |
| James     | 2010 | Australia   | Busselton                | WPR | HIC  | 1990                     | Random            | 18-54 | Ever diagnosed asthma |
| Ronchetti | 2001 | Italy       | Rome                     | EUR | HIC  | 1974-1998                | Random            | 6-14  | Ever diagnosed asthma |
| Wang      | 2004 | Singapore   | Singapore                | WPR | HIC  | 1994-2001                | Cluster sampling  | 6-7   | Ever wheezing         |
| Bemanin   | 2015 | Afghanistan | Kabul                    | EMR | LMIC | 2010-2011                | Random            | NA    | Ever diagnosed asthma |
| Robertson | 1991 | Australia   | Melbourne                | WPR | HIC  | 1990                     | Two stage random  | 7-15  | Current wheezing      |
| Roos      | 2018 | Netherlands | Rotterdam                | EUR | HIC  | 2018                     | Random            | NA    | Ever diagnosed asthma |
| Toelle    | 2004 | Australia   | Belmont                  | WPR | HIC  | 1992-2002                | Random            | 8-11  | Ever diagnosed asthma |
| Brunner   | 2005 | US          | Minnesota                | AMR | HIC  | 2001                     | Stratified random | 13-16 | Current wheezing      |
| Hasnain   | 2009 | Pakistan    | Karachi                  | EMR | LMIC | 2007                     | Random            | 3-16  | Ever diagnosed asthma |
| Reis      | 2015 | Brazil      | Salvador                 | AMR | LMIC | 2006                     | Random            | < 4   | Current wheezing      |
| Nguyen    | 2015 | US          | Orange County            | AMR | HIC  | June 2011 and April 2012 | Random            | 3-12  | Ever diagnosed asthma |
| Huure     | 2004 | Finland     | Southern Finland         | EUR | HIC  | 1983-1999                | Random            | 16-32 | Ever diagnosed asthma |
| Ozdemir   | 2000 | Turkey      | Eskisehir, Turkey        | EUR | LMIC | 1997-1998                | Two-step sampling | 16-30 | Current wheezing      |
| Liao      | 2009 | Taiwan      | Changhwa, Central Taiwan | WPR | LMIC | 2002-2007                | Cluster random    | 6-8   | Ever wheezing         |

| Author | Year Published | Country | Study site | WHO Region | WB Income Region | Investigation Date | Sampling Strategy | Age range | Group |
|--------|----------------|---------|------------|------------|------------------|--------------------|-------------------|-----------|-------|
|--------|----------------|---------|------------|------------|------------------|--------------------|-------------------|-----------|-------|

|             |      |             |                           |      |      |                               |                             |            |                       |
|-------------|------|-------------|---------------------------|------|------|-------------------------------|-----------------------------|------------|-----------------------|
| Strachan    | 1994 | UK          | Great Britain             | EUR  | HIC  | March and April, 1992         | Two stage stratified random | 5-17       | Current wheezing      |
| Weiland     | 1999 | Germany     | East and West of Germany  | EUR  | HIC  | 1995-1996                     | Random                      | 5-11       | Current wheezing      |
| Ronmark     | 2002 | Sweden      | Northern Sweden           | EUR  | HIC  | 1996-1998                     | Random                      | 7-8        | Ever wheezing         |
| Saraclar    | 1997 | Turkey      | Ankara                    | EUR  | LMIC | 1994                          | Random                      | 18+        | Ever wheezing         |
| Nishima     | 2009 | Japan       | Japan                     | WPR  | HIC  | NA                            | Random                      | 6-12       | Ever diagnosed asthma |
| Lee         | 2003 | US          | Boston, Chinatown         | AMR  | HIC  | 2003                          | Random                      | 5-10       | Ever diagnosed asthma |
| Vanfleteren | 2012 | Netherlands | Maastricht                | EUR  | HIC  | Oct 2007-Mar 2009             | Random                      | 40+        | Ever diagnosed asthma |
| Renwick     | 1996 | UK          | Leeds                     | EUR  | HIC  | Jan 1992 - Feb 1994           | Random                      | NA         | Current wheezing      |
| Matsumoto   | 2015 | Japan       | Hisayama                  | SEAR | HIC  | 2008                          | Random                      | 40+        | Ever diagnosed asthma |
| Carlsson    | 2013 | Sweden      | Stockholm                 | EUR  | HIC  | 40878                         | Random                      | 0-85+      | Ever diagnosed asthma |
| Maia        | 2004 | Brazil      | Montes Claros, Brazil     | AMR  | LMIC | 2004                          | Random                      | 13-14      | Current wheezing      |
| Kiboneka    | 2016 | Botswana    | Gaborone, Botswana        | AFR  | LMIC | October 2014 to November 2015 | Random                      | 6-7; 13-14 | Ever wheezing         |
| Hu          | 1997 | US          | Los Angeles and San Diego | AMR  | HIC  | 1993                          | Random                      | 20-22      | Ever diagnosed asthma |
| Pakhale     | 2008 | India       | Maharashtra, West India   | SEAR | LMIC | November - December, 2004     | Random                      | 13-14      | Ever diagnosed asthma |

| Author          | Year Published | Country   | Study site                     | WHO Region | WB Income Region | Investigation Date        | Sampling Strategy | Age range | Group                  |
|-----------------|----------------|-----------|--------------------------------|------------|------------------|---------------------------|-------------------|-----------|------------------------|
| Lawson          | 2017           | Canada    | Saskatchewan                   | AMR        | HIC              | 2013                      | Random            | 5-14      | Ever diagnosed asthma  |
| Rizwan          | 2004           | UK        | Bootle, Merseyside             | EUR        | HIC              | 1991                      | Random            | 5-11      | Ever diagnosed asthma  |
| Freitas         | 2012           | Brazil    | Brazilian Amazon islands, Para | AMR        | LMIC             | 2007-2009                 | Convenience       | 5-8       | Ever wheezing          |
| Findley         | 2003           | US        | East, Harlem                   | AMR        | HIC              | NA                        | Random            | NA        | Ever diagnosed asthma  |
| Simon           | 2003           | US        | Los Angeles                    | AMR        | HIC              | September 1999-April 2000 | Random            | < 18      | Ever diagnosed asthma  |
| Hoffmann        | 2007           | Germany   | East and West, Germany         | EUR        | HIC              | 2003                      | Two-staged        | 18+       | Ever diagnosed asthma  |
| Claudio         | 2006           | US        | New York City                  | AMR        | HIC              | 2002-2003                 | Stratified Random | 4-13      | Newly diagnosed asthma |
| Silva           | 2013           | Brazil    | Salvador, Northeast Brazil     | AMR        | LMIC             | August-December 2010      | Random            | 6-12      | Current wheezing       |
| Bryant-Stephens | 2012           | US        | West and North Philadelphia    | AMR        | HIC              | 2006-2008                 | Random            | 5-14      | Ever diagnosed asthma  |
| Goh             | 1996           | Singapore | Singapore                      | WPR        | HIC              | February - November, 1994 | Random            | 6-7       | Ever wheezing          |
| Carillo         | 2018           | US        | Hidalgo, County Texas          | AMR        | HIC              | October 2014-May 2016     | Random            | 2-18      | Ever diagnosed asthma  |
| Mallol          | 2010           | Argentina | Argentina                      | AMR        | HIC              | 2010                      | Random            | 13-14     | Current wheezing       |
| Mallol          | 2010           | Bolivia   | Bolivia                        | AMR        | LMIC             | 2010                      | Random            | 13-14     | Current wheezing       |

|        |      |          |          |     |      |      |        |       |                  |
|--------|------|----------|----------|-----|------|------|--------|-------|------------------|
| Mallol | 2010 | Brazil   | Brazil   | AMR | LMIC | 2010 | Random | 13-14 | Current wheezing |
| Mallol | 2010 | Chile    | Chile    | AMR | HIC  | 2010 | Random | 13-14 | Current wheezing |
| Mallol | 2010 | Colombia | Colombia | AMR | LMIC | 2010 | Random | 13-14 | Current wheezing |

| Author | Year Published | Country     | Study site  | WHO Region | WB Income Region | Investigation Date | Sampling Strategy | Age range | Group                 |
|--------|----------------|-------------|-------------|------------|------------------|--------------------|-------------------|-----------|-----------------------|
| Mallol | 2010           | Costa Rica  | Costa Rica  | AMR        | LMIC             | 2010               | Random            | 13-14     | Current wheezing      |
| Mallol | 2010           | Cuba        | Cuba        | AMR        | LMIC             | 2010               | Random            | 13-14     | Current wheezing      |
| Mallol | 2010           | Ecuador     | Ecuador     | AMR        | LMIC             | 2010               | Random            | 13-14     | Current wheezing      |
| Mallol | 2010           | El Salvador | El Salvador | AMR        | LMIC             | 2010               | Random            | 13-14     | Current wheezing      |
| Mallol | 2010           | Honduras    | Honduras    | AMR        | LMIC             | 2010               | Random            | 13-14     | Current wheezing      |
| Mallol | 2010           | Mexico      | Mexico      | AMR        | LMIC             | 2010               | Random            | 13-14     | Current wheezing      |
| Mallol | 2010           | Nicaragua   | Nicaragua   | AMR        | LMIC             | 2010               | Random            | 13-14     | Current wheezing      |
| Mallol | 2010           | Panama      | Panama      | AMR        | LMIC             | 2010               | Random            | 13-14     | Current wheezing      |
| Mallol | 2010           | Paraguay    | Paraguay    | AMR        | LMIC             | 2010               | Random            | 13-14     | Current wheezing      |
| Mallol | 2010           | Peru        | Peru        | AMR        | LMIC             | 2010               | Random            | 13-14     | Current wheezing      |
| Mallol | 2010           | Uruguay     | Uruguay     | AMR        | HIC              | 2010               | Random            | 13-14     | Current wheezing      |
| Mallol | 2010           | Venezuela   | Venezuela   | AMR        | LMIC             | 2010               | Random            | 13-14     | Current wheezing      |
| Mallol | 2010           | Argentina   | Argentina   | AMR        | HIC              | 2010               | Random            | 13-14     | Ever diagnosed asthma |
| Mallol | 2010           | Bolivia     | Bolivia     | AMR        | LMIC             | 2010               | Random            | 13-14     | Ever diagnosed asthma |
| Mallol | 2010           | Brazil      | Brazil      | AMR        | LMIC             | 2010               | Random            | 13-14     | Ever diagnosed asthma |
| Mallol | 2010           | Chile       | Chile       | AMR        | HIC              | 2010               | Random            | 13-14     | Ever diagnosed asthma |
| Mallol | 2010           | Colombia    | Colombia    | AMR        | LMIC             | 2010               | Random            | 13-14     | Ever diagnosed asthma |
| Mallol | 2010           | Costa Rica  | Costa Rica  | AMR        | LMIC             | 2010               | Random            | 13-14     | Ever diagnosed asthma |
| Mallol | 2010           | Cuba        | Cuba        | AMR        | LMIC             | 2010               | Random            | 13-14     | Ever diagnosed asthma |
| Mallol | 2010           | Ecuador     | Ecuador     | AMR        | LMIC             | 2010               | Random            | 13-14     | Ever diagnosed asthma |
| Mallol | 2010           | El Salvador | El Salvador | AMR        | LMIC             | 2010               | Random            | 13-14     | Ever diagnosed asthma |



|        |      |           |           |     |      |      |        |       |                       |
|--------|------|-----------|-----------|-----|------|------|--------|-------|-----------------------|
| Mallol | 2010 | Honduras  | Honduras  | AMR | LMIC | 2010 | Random | 13-14 | Ever diagnosed asthma |
| Mallol | 2010 | Mexico    | Mexico    | AMR | LMIC | 2010 | Random | 13-14 | Ever diagnosed asthma |
| Mallol | 2010 | Nicaragua | Nicaragua | AMR | LMIC | 2010 | Random | 13-14 | Ever diagnosed asthma |
| Mallol | 2010 | Panama    | Panama    | AMR | LMIC | 2010 | Random | 13-14 | Ever diagnosed asthma |
| Mallol | 2010 | Paraguay  | Paraguay  | AMR | LMIC | 2010 | Random | 13-14 | Ever diagnosed asthma |
| Mallol | 2010 | Peru      | Peru      | AMR | LMIC | 2010 | Random | 13-14 | Ever diagnosed asthma |
| Mallol | 2010 | Uruguay   | Uruguay   | AMR | HIC  | 2010 | Random | 13-14 | Ever diagnosed asthma |

| Author          | Year Published | Country   | Study site          | WHO Region | WB Income Region | Investigation Date    | Sampling Strategy | Age range | Group                 |
|-----------------|----------------|-----------|---------------------|------------|------------------|-----------------------|-------------------|-----------|-----------------------|
| Mallol          | 2010           | Venezuela | Venezuela           | AMR        | LMIC             | 2010                  | Random            | 13-14     | Ever diagnosed asthma |
| Romano-Zelekha  | 2007           | Israel    | Israel              | EUR        | HIC              | 1997                  | Random            | 13-14     | Ever diagnosed asthma |
| El Ftouh        | 2009           | Algeria   | Algeria             | AFR        | LMIC             | January 2008-May 2008 | Random stratified | NA        | Ever diagnosed asthma |
| El Ftouh        | 2009           | Morocco   | Morocco             | EMR        | LMIC             | January 2008-May 2008 | Random stratified | NA        | Ever diagnosed asthma |
| El Ftouh        | 2009           | Tunisia   | Tunisia             | EMR        | LMIC             | January 2008-May 2008 | Random stratified | NA        | Ever diagnosed asthma |
| Stojanovic-Rist | 2006           | Serbia    | Belgrade, Serbia    | EUR        | LMIC             | 1996-2001             | Random            | 19-23     | Ever diagnosed asthma |
| Shamssain       | 1999           | UK        | North East, England | EUR        | HIC              | 1999                  | Random            | 6-7       | Ever wheezing         |

|               |      |            |                                                                |     |      |                            |                                    |       |                       |
|---------------|------|------------|----------------------------------------------------------------|-----|------|----------------------------|------------------------------------|-------|-----------------------|
| Kim           | 2013 | Korea, Rep | Korea                                                          | WPR | HIC  | 1998-2008                  | Multistaged Stratified Probability | 20-59 | Ever diagnosed asthma |
| Romanmtowski  | 2015 | Poland     | Tricity                                                        | EUR | HIC  | April 2011 - December 2011 | Random                             | 1-18  | Ever diagnosed asthma |
| Brugge        | 2008 | US         | Dorchester, Massachusetts                                      | AMR | HIC  | 2005-2006                  | Convenience                        | 18+   | Current wheezing      |
| Shimwela      | 2014 | Tanzania   | Ilala and Bagamoyo                                             | AFR | LMIC | 2007                       | Random                             | 0+    | Ever diagnosed asthma |
| Senthilselvan | 2016 | Canada     | 10 Canadian provinces, the Northwest Territories and the Yukon | AMR | HIC  | 2002-2010                  | Two-staged stratified              | 0-11  | Ever diagnosed asthma |

| Author  | Year Published | Country | Study site                                          | WHO Region | WB Income Region | Investigation Date | Sampling Strategy | Age range | Group                 |
|---------|----------------|---------|-----------------------------------------------------|------------|------------------|--------------------|-------------------|-----------|-----------------------|
| Ziyab   | 2017           | Kuwait  | Kuwait                                              | EMR        | HIC              | January -May 2015  | Random            | 18-26     | Ever wheezing         |
| Kainu   | 2013           | Finland | Helsinki                                            | EUR        | HIC              | 1996-2006          | Random            | 20-69     | Ever diagnosed asthma |
| Gershon | 2010           | Canada  | Ontario                                             | AMR        | HIC              | 1991-2005          | Random            | 0+        | Ever diagnosed asthma |
| Gershon | 2010           | Canada  | Ontario                                             | AMR        | HIC              | 1991-2005          | Random            | 0+        | Ever diagnosed asthma |
| Singh   | 2016           | India   | Rajasthan, Punjab, Maharashtra, Kerala and Karnatak | SEAR       | LMIC             | 2001-2003          | Random            | 6-14      | Ever diagnosed asthma |

|         |      |          |                                 |     |      |                                     |                              |       |                       |
|---------|------|----------|---------------------------------|-----|------|-------------------------------------|------------------------------|-------|-----------------------|
| Peroni  | 2009 | Italy    | Verona,<br>Northern Italy       | EUR | HIC  | 2009                                | Random                       | 3-5   | Current wheezing      |
| Kaur    | 1998 | UK       | England, Wales,<br>and Scotland | EUR | HIC  | 1995                                | Statified<br>Clustered       | 12-14 | Ever wheezing         |
| Kuehni  | 2000 | UK       | Leicester                       | EUR | HIC  | 1985-<br>1998                       | Age-<br>stratified<br>random | 8-13  | Current wheezing      |
| Delmas  | 2009 | France   | France                          | EUR | HIC  | October<br>2002-<br>October<br>2003 | Random                       | 11-14 | Current wheezing      |
| Werneck | 1999 | Brazil   | Itabira or Santa<br>Maria       | AMR | LMIC | June -<br>October<br>1994           | Random                       | 7-8   | Ever diagnosed asthma |
| Norzila | 2000 | Malaysia | Kuala Lumpur                    | WPR | LMIC | 2000                                | Random                       | 7-12  | Ever wheezing         |
| Ngui    | 2011 | Malaysia | Orang Asli                      | WPR | LMIC | Novemb<br>er 2007<br>- July<br>2009 | Random                       | 0+    | Current wheezing      |
| Felix   | 2015 | US       | Puerto Rico                     | AMR | HIC  | 2008-<br>2010                       | Random                       | 18+   | Ever diagnosed asthma |

| Author         | Year Published | Country    | Study site                         | WHO Region | WB Income Region | Investigation Date                   | Sampling Strategy | Age range       | Group                 |
|----------------|----------------|------------|------------------------------------|------------|------------------|--------------------------------------|-------------------|-----------------|-----------------------|
| Anthracopoulos | 2007           | Greece     | Patras                             | EUR        | HIC              | 1991-<br>2003                        | Random            | 8-10            | Current wheezing      |
| Lamnisos       | 2013           | Cyprus     | Greek-Cypriot &<br>Turkish-Cypriot | EUR        | HIC              | 2007-<br>2009                        | Random            | 7-8 & 13-<br>14 | Current wheezing      |
| Bishwajit      | 2017           | Bangladesh | South Asia                         | SEAR       | LMIC             | January<br>2002<br>Decemb<br>er 2002 | Random            | 18+             | Ever diagnosed asthma |

|                |      |              |                            |      |      |                               |             |       |                       |
|----------------|------|--------------|----------------------------|------|------|-------------------------------|-------------|-------|-----------------------|
| Bishwajit      | 2017 | India        | South Asia                 | SEAR | LMIC | January 2002<br>December 2002 | Random      | 18+   | Ever diagnosed asthma |
| Bishwajit      | 2017 | Nepal        | South Asia                 | SEAR | LMIC | January 2002<br>December 2002 | Random      | 18+   | Ever diagnosed asthma |
| Bishwajit      | 2017 | Pakistan     | South Asia                 | EMR  | LMIC | January 2002<br>December 2002 | Random      | 18+   | Ever diagnosed asthma |
| Bishwajit      | 2017 | Sri Lanka    | South Asia                 | SEAR | LMIC | January 2002<br>December 2002 | Random      | 18+   | Ever diagnosed asthma |
| Austin         | 1994 | UK           | Scotland                   | EUR  | HIC  | 1992                          | Random      | 12-13 | Ever diagnosed asthma |
| Moradi-Lakeh   | 2015 | Saudi Arabia | Saudi                      | EMR  | HIC  | 2015                          | Multistaged | 15+   | Ever diagnosed asthma |
| Fedortsiv      | 2012 | Ukraine      | Ternopil                   | EUR  | LMIC | 2010                          | Cluster     | 6-14  | Ever diagnosed asthma |
| Trakultivakorn | 2007 | Thailand     | Bangkok and<br>Chiang Mai  | SEAR | LMIC | 2001                          | Random      | 6-7   | Ever diagnosed asthma |
| Gupta          | 2001 | India        | Chandigarh,<br>North India | SEAR | LMIC | July 1997-                    | Random      | 9-20  | Ever diagnosed asthma |

| Author | Year Published | Country | Study site | WHO Region | WB Income Region | Investigation Date | Sampling Strategy | Age range | Group |
|--------|----------------|---------|------------|------------|------------------|--------------------|-------------------|-----------|-------|
|--------|----------------|---------|------------|------------|------------------|--------------------|-------------------|-----------|-------|

June  
1999

|           |      |        |                                                  |      |      |                               |                     |       |                        |
|-----------|------|--------|--------------------------------------------------|------|------|-------------------------------|---------------------|-------|------------------------|
| Musafiri  | 2011 | Rwanda | Kigali and Huye, Southern Rwanda                 | AFR  | LMIC | February 2008 and August 2009 | Random              | 15-80 | Current wheezing       |
| Kim       | 2014 | Sweden | Vastra Gotaland County                           | EUR  | HIC  | 2000-2008                     | Random              | 15    | Current wheezing       |
| Greenlee  | 2008 | US     | Marshfield                                       | AMR  | HIC  | 2008                          | Random              | 5-17  | Ever wheezing          |
| Ma        | 2017 | China  | China                                            | WPR  | LMIC | 2009 and 2011                 | Random              | 18+   | Ever diagnosed asthma  |
| Middleton | 2014 | Cyprus | Cyprus                                           | EUR  | HIC  | 2006-2007                     | Random              | 15-17 | Newly diagnosed asthma |
| Shakurnia | 2010 | Iran   | Ahvaz city, south-west                           | EMR  | LMIC | 2007                          | Random              | 6-7   | Ever wheezing          |
| Jarvis    | 1994 | UK     | Cambridge, Ipswich and Norwich                   | EUR  | HIC  | October 1990-June 1991        | Random              | 20-44 | Current wheezing       |
| Glushkova | 2008 | Russia | Vasiljevki, Central St. Petersburg               | EUR  | LMIC | 2003                          | Random              | 0-18  | Ever diagnosed asthma  |
| Nystad    | 1997 | Norway | Oslo                                             | EUR  | HIC  | 1981 & 1994                   | Random              | 6-16  | Ever diagnosed asthma  |
| Rose      | 2006 | US     | Puerto Ricans and in the Northeast census region | AMR  | HIC  | 1998-2000                     | Complex Multistaged | 18+   | Ever diagnosed asthma  |
| Jindal    | 2000 | India  | Chandigarh                                       | SEAR | LMIC | July 1995-June 1997           | Random              | 18+   | Ever diagnosed asthma  |

---

| Author                         | Year Published | Country      | Study site                              | WHO Region | WB Income Region | Investigation Date | Sampling Strategy | Age range | Group                  |
|--------------------------------|----------------|--------------|-----------------------------------------|------------|------------------|--------------------|-------------------|-----------|------------------------|
| Peat                           | 1994           | Australia    | New South Wales                         | WPR        | HIC              | June 1982 - 1992   | Random            | 8-10      | Ever diagnosed asthma  |
| Gao                            | 2008           | Canada       | Northwest Territories                   | AMR        | HIC              | 1994-1995          | Random            | 0-11      | Ever diagnosed asthma  |
| Jerning                        | 2013           | Sweden       | Stockholm, Gothenburg, Uppsala and Umea | EUR        | HIC              | 2008               | Random            | 16-75     | Newly diagnosed asthma |
| Wehrmeister                    | 2010           | Brazil       | South and Northeast regions             | AMR        | LMIC             | 2003               | Random            | <10       | Ever diagnosed asthma  |
| Al Ghobain, M. O., et al.      | 2012           | Saudi Arabia | Riyadh, Saudi Arabia.                   | EMR        | HIC              | 2009-2010          | Random            | 16-18     | Ever wheezing          |
| Barraza Villarreal, A., et al. | 2003           | Mexico       | Juarez, Chihuahua, Mexico,              | AMR        | LMIC             | 2003               | Random            | 6-14      | Ever diagnosed asthma  |
| Tan, T. N., et al.             | 2006           | Singapore    | Singapore                               | WPR        | HIC              | 2000               | Random            | 4-6       | Ever wheezing          |
| Sole, D., et al.               | 2015           | Brazil       | Brazil                                  | AMR        | LMIC             | 2012               | Random            | 13-14     | Ever wheezing          |
| Kabesch, M., et al.            | 1999           | Germany      | Munich, Germany                         | EUR        | HIC              | 1989-1990          | Random            | 9-11      | Current wheezing       |
| Broms, K., et al.              | 2012           | Sweden       | Sweden                                  | EUR        | HIC              | 2002-2007          | Random            | 1-6       | Ever wheezing          |
| Chan-Yeung, M., et al.         | 2002           | China        | Beijing, China                          | WPR        | LMIC             | 1996-1997          | Random            | =/>15     | Ever wheezing          |
| Mvula, M., et al.              | 2005           | US           | New Orleans, US                         | AMR        | HIC              | 2000               | Random            | NA        | Ever wheezing          |
| Joseph, C. L., et al.          | 1996           | US           | Detroit, US                             | AMR        | HIC              | 1993               | Random            | NA        | Ever diagnosed asthma  |

|                      |      |         |                                                               |     |     |           |        |       |               |
|----------------------|------|---------|---------------------------------------------------------------|-----|-----|-----------|--------|-------|---------------|
| Pekkanen, J., et al. | 1997 | Finland | Helsinki area; Turku and Pori County; Kuo-pio County; and the | EUR | HIC | 1994-1995 | Random | 13-14 | Ever wheezing |
|----------------------|------|---------|---------------------------------------------------------------|-----|-----|-----------|--------|-------|---------------|

| Author                            | Year Published | Country      | Study site                                      | WHO Region | WB Income Region | Investigation Date | Sampling Strategy | Age range   | Group                  |
|-----------------------------------|----------------|--------------|-------------------------------------------------|------------|------------------|--------------------|-------------------|-------------|------------------------|
| Habbick, B. F., et al.            | 1999           | Canada       | southern part of Laplan<br>Hamilton & Saskatoon | AMR        | HIC              | 1994-1995          | Random            | 6-7 & 13-14 | Ever diagnosed asthma  |
| Shohat, T., et al.                | 2000           | Israel       | Israel                                          | EUR        | HIC              | 1997               | Random            | 13-14       | Newly diagnosed asthma |
| Leung, R., et al.                 | 1994           | Hong Kong    | Hong Kong                                       | WPR        | HIC              | 1992               | Random            | 7, 12 & 15  | Ever wheezing          |
| Yeatts, K. B. and C. M. Shy       | 2001           | US           | North Carolina                                  | AMR        | HIC              | 1996               | Random            | 13-15       | Ever wheezing          |
| Arif, A. A., et al.               | 2005           | US           | West Texas                                      | AMR        | HIC              | 2001               | Random            | =/>65       | Ever diagnosed asthma  |
| Meren, M., et al.                 | 2005           | Estonia      | Tallinn, Narva and Saaremaa                     | EUR        | HIC              | 1995-2000          | Random            | 15-64       | Current wheezing       |
| Larsson, L.                       | 1995           | Sweden       | Jamtland and Gatrikland.                        | EUR        | HIC              | 1990-1993          | Random            | 13-24       | Ever wheezing          |
| Rona, R. J., et al.               | 1995           | UK           | UK                                              | EUR        | HIC              | 1982 & 1992        | Random            | 5-11        | Current wheezing       |
| Mellinger-Birdsong, A. K., et al. | 2003           | US           | Georgia                                         | AMR        | HIC              | 2000               | Random            | 0-17        | Ever diagnosed asthma  |
| Dow, L., et al.                   | 2001           | UK           | South west England                              | EUR        | HIC              | 2001               | Random            | =/>65       | Ever diagnosed asthma  |
| Unlu, M., et al.                  | 2002           | Turkey       | Afyon                                           | EUR        | LMIC             | 2001               | Random            | 13-18       | Current wheezing       |
| Al Ghobain, M. O., et al.         | 2018           | Saudi Arabia | Riyadh, Saudi Arabia.                           | EMR        | HIC              | 2016               | Random            | 20-44       | Current wheezing       |
| McCann, D., et al.                | 2002           | UK           | South of England                                | EUR        | HIC              | 2002               | Random            | 7-9         | Ever diagnosed asthma  |

|                       |      |          |                                  |     |      |           |        |       |                       |
|-----------------------|------|----------|----------------------------------|-----|------|-----------|--------|-------|-----------------------|
| Pallasaho, P., et al. | 2002 | Sweden   | Helsinki, Stockholm, and Tallinn | EUR | HIC  | 1996      | Random | 20-64 | Current wheezing      |
| Khan, A. A., et al.   | 2014 | Pakistan | Karachi                          | EMR | LMIC | 2012-2013 | Random | 3-17  | Ever diagnosed asthma |
| Aberle, N., et al.    | 2018 | Croatia  | Brod-Posavina County             | EUR | LMIC | 2007-2008 | Random | 10-11 | Ever wheezing         |

| Author                         | Year Published | Country    | Study site                                | WHO Region | WB Income Region | Investigation Date | Sampling Strategy | Age range   | Group                  |
|--------------------------------|----------------|------------|-------------------------------------------|------------|------------------|--------------------|-------------------|-------------|------------------------|
| Valery, P. C., et al.          | 2001           | Australia  | Torres Strait and Northern Peninsula Area | WPR        | HIC              | 1999               | Random            | 0-17        | Ever wheezing          |
| Kurukulaaratchy, R. J., et al. | 2002           | UK         | Isle of Wight                             | EUR        | HIC              | 1989-1999          | Random            | 10          | Current wheezing       |
| Leung, R. and P. Ho            | 1994           | Malaysia   | Kota Kinabalu                             | WPR        | HIC              | 1992               | Random            | 11-20       | Ever wheezing          |
| Letamo, G., et al.             | 2017           | Botswana   | Botswana                                  | AFR        | LMIC             | 2013               | Random            | 10-64       | Ever diagnosed asthma  |
| Yoshihara, S., et al.          | 2016           | Mongolia   | Ulaanbaatar                               | WPR        | LMIC             | 2009               | Random            | 6-7         | Ever wheezing          |
| Levesque, B., et al.           | 2004           | Canada     | Quebec                                    | AMR        | HIC              | 1999               | Random            | 9, 13 & 16  | Ever diagnosed asthma  |
| Schuh, C., et al.              | 2015           | Brazil     | Porto Alegre                              | AMR        | LMIC             | 2013               | Random            | 10-18       | Newly diagnosed asthma |
| Cakir, E., et al.              | 2010           | Turkey     | Istanbul's Kartal County                  | EUR        | LMIC             | 2010               | Random            | <=16 & >17  | Ever wheezing          |
| Zivkovic, Z., et al.           | 2010           | Serbia     | Belgrade, Nis, Novi Sad & Sombor          | EUR        | LMIC             | 2009               | Random            | 6-7 & 13-14 | Ever diagnosed asthma  |
| Zivkovic, Z., et al.           | 2010           | Montenegro | Podgorica                                 | EUR        | LMIC             | 2009               | Random            | 6-7 & 13-14 | Ever diagnosed asthma  |
| Hessel, P. A., et al.          | 2001           | Canada     | Alberta (Red deer & Medicine Hat)         | AMR        | HIC              | 2000               | Random            | 5-19        | Ever diagnosed asthma  |



|                          |      |          |                               |      |      |           |        |          |                       |
|--------------------------|------|----------|-------------------------------|------|------|-----------|--------|----------|-----------------------|
| Stout, J. W., et al.     | 2001 | US       | Tacoma, Washington and Alaska | AMR  | HIC  | 1997-1998 | Random | 11-16    | Ever diagnosed asthma |
| Chhabra, S. K., et al.   | 1998 | India    | Delhi                         | SEAR | LMIC | 1997      | Random | 4-17     | Current wheezing      |
| Jain, A., et al.         | 2010 | India    | Manipal                       | SEAR | LMIC | 2009      | Random | 6-15     | Current wheezing      |
| Yemaneberhan, H., et al. | 1997 | Ethiopia | Jimma                         | AFR  | LMIC | 1996      | Random | 0-70= /> | Current wheezing      |
| Pite, H., et al.         | 2014 | Portugal | Mainland Portugal             | EUR  | HIC  | 2008      | Random | = />65   | Ever diagnosed asthma |

| Author                       | Year Published | Country   | Study site                                                               | WHO Region | WB Income Region | Investigation Date | Sampling Strategy | Age range   | Group                 |
|------------------------------|----------------|-----------|--------------------------------------------------------------------------|------------|------------------|--------------------|-------------------|-------------|-----------------------|
| Ponsonby, A. L., et al.      | 2008           | Australia | Australian Capital Territory                                             | WPR        | HIC              | 1999-2005          | Random            | 4-6         | Ever diagnosed asthma |
| Gonzalez-Garcia, M., et al.  | 2015           | Colombia  | Barranquilla, Bucaramanga, Cali, Medellin and Bogota                     | AMR        | LMIC             | 2015               | Random            | 40-93       | Ever wheezing         |
| Teeratakulpisarn, J., et al. | 2000           | Thailand  | Khon Kaen                                                                | SEAR       | LMIC             | 2003               | Random            | 6-7 & 13-14 | Ever wheezing         |
| Leung, R., et al.            | 1997           | Hong Kong | Hong Kong                                                                | WPR        | HIC              | 1994-1995          | Random            | 13-14       | Ever diagnosed asthma |
| Ding, Y. P., et al.          | 2012           | China     | Hainan                                                                   | WPR        | LMIC             | 2012               | Random            | 2-90        | Ever diagnosed asthma |
| Dennis, R. J., et al.        | 2012           | Colombia  | Barranquilla, Bogotá, Bucaramanga, Cali, Medellin, and San Andrés Island | AMR        | LMIC             | 2009-2010          | Random            | 1-59        | Ever wheezing         |
| Zhu, W. J., et al.           | 2015           | China     | Beijing                                                                  | WPR        | LMIC             | 2010-2011          | Random            | 1-14        | Ever diagnosed asthma |

|                        |      |           |                     |     |      |             |        |       |                       |
|------------------------|------|-----------|---------------------|-----|------|-------------|--------|-------|-----------------------|
| Faniran, A. O., et al. | 1999 | Australia | Sydney              | WPR | HIC  | 1999        | Random | 8-11  | Ever diagnosed asthma |
| Faniran, A. O., et al. | 1999 | Nigeria   | Ojo                 | AFR | LMIC | 1999        | Random | 8-11  | Ever diagnosed asthma |
| Nordlund, B., et al.   | 2014 | Sweden    | Stockholm           | EUR | HIC  | 1994-2008   | Random | 0-12  | Ever diagnosed asthma |
| Nelson, K. A., et al.  | 2009 | US        | St. Louis, Missouri | AMR | HIC  | 1992 & 2004 | Random | 10-12 | Current wheezing      |
| Sole, D., et al.       | 2015 | Brazil    | Belem               | AMR | LMIC | 2011-2012   | Random | 13-14 | Ever wheezing         |
| Sole, D., et al.       | 2015 | Brazil    | Recife              | AMR | LMIC | 2011-2012   | Random | 13-14 | Ever wheezing         |
| Sole, D., et al.       | 2015 | Brazil    | Macelo              | AMR | LMIC | 2011-2012   | Random | 13-14 | Ever wheezing         |

| Author                  | Year Published | Country  | Study site                                                   | WHO Region | WB Income Region | Investigation Date | Sampling Strategy | Age range | Group                 |
|-------------------------|----------------|----------|--------------------------------------------------------------|------------|------------------|--------------------|-------------------|-----------|-----------------------|
| Sole, D., et al.        | 2015           | Brazil   | Aracaju                                                      | AMR        | LMIC             | 2011-2012          | Random            | 13-14     | Ever wheezing         |
| Sole, D., et al.        | 2015           | Brazil   | Belo Horizonte                                               | AMR        | LMIC             | 2011-2012          | Random            | 13-14     | Ever diagnosed asthma |
| Sole, D., et al.        | 2015           | Brazil   | Sao Paulo                                                    | AMR        | LMIC             | 2011-2012          | Random            | 13-14     | Ever diagnosed asthma |
| Sole, D., et al.        | 2015           | Brazil   | Curitiba                                                     | AMR        | LMIC             | 2011-2012          | Random            | 13-14     | Ever diagnosed asthma |
| Zollner, I. K., et al.  | 2005           | Germany  | Baden-Wuerttemberg: Mannheim, Kehl and Aulendorf/Bad Waldsee | EUR        | HIC              | 1992-2001          | Random            | 9-11      | Ever diagnosed asthma |
| Wanlapakorn, N., et al. | 2014           | Thailand | Bangkok                                                      | SEAR       | LMIC             | 2012               | Random            | 6-12      | Ever wheezing         |

|                        |      |                |                                                    |     |      |           |        |              |                       |
|------------------------|------|----------------|----------------------------------------------------|-----|------|-----------|--------|--------------|-----------------------|
| Demir, A. U., et al.   | 2010 | Turkey         | Ankara                                             | EUR | LMIC | 1992-2007 | Random | 7-12         | Ever diagnosed asthma |
| Wang, H. Y., et al.    | 2008 | China          | Guangzhou, Beijing and Hong Kong,                  | WPR | LMIC | 2001-2003 | Random | 13-14        | Ever wheezing         |
| Wang, H. Y., et al.    | 2008 | Canada         | Vancouver                                          | AMR | HIC  | 2001-2003 | Random | 13-14        | Ever wheezing         |
| Pallasaho, P., et al.  | 1999 | Finland        | Helsinki                                           | EUR | HIC  | 1996      | Random | 20-69        | Current wheezing      |
| Tarraf, H., et al.     | 2018 | Egypt          | Egypt                                              | EMR | LMIC | 2014-2016 | Random | 18 and above | Ever diagnosed asthma |
| Tarraf, H., et al.     | 2018 | Gulf countries | Kuwait, Saudi Arabia, and the United Arab Emirates | EMR | LMIC | 2014-2016 | Random | 18 and above | Ever diagnosed asthma |
| Tarraf, H., et al.     | 2018 | Turkey         | Turkey                                             | EUR | LMIC | 2014-2016 | Random | 18 and above | Ever diagnosed asthma |
| Al-Thamiri, D., et al. | 2005 | Iraq           | Baghdad                                            | EMR | LMIC | 2000-2002 | Random | 6-15         | Ever wheezing         |

| Author                   | Year Published | Country   | Study site                          | WHO Region | WB Income Region | Investigation Date | Sampling Strategy | Age range | Group                 |
|--------------------------|----------------|-----------|-------------------------------------|------------|------------------|--------------------|-------------------|-----------|-----------------------|
| Roncada, C., et al.      | 2016           | Brazil    | Porto Alegre                        | AMR        | LMIC             | 2013               | Random            | 8-16      | Current wheezing      |
| Peat, J. K., et al.      | 1992           | Australia | Busselton                           | WPR        | HIC              | 1981 & 1990        | Random            | 18-55     | Ever diagnosed asthma |
| Ekici, A., et al. (2012) | 2012           | Turkey    | Kirikkale                           | EUR        | LMIC             | 2004               | Random            | NA        | Ever diagnosed asthma |
| Palvo, F., et al.        | 2008           | Brazil    | Saˆo Jose´ do Rio Preto, Saˆo Paulo | AMR        | LMIC             | 2003-2004          | Random            | 6-7       | Ever diagnosed asthma |
| Tang, S. P., et al.      | 2017           | China     | Fuzhou                              | WPR        | LMIC             | 2010-2011          | Random            | 0-14      | Ever diagnosed asthma |

|                           |      |            |                                                                |      |      |           |        |              |                        |
|---------------------------|------|------------|----------------------------------------------------------------|------|------|-----------|--------|--------------|------------------------|
| Musharrafieh, U., et al.  | 2009 | Lebanon    | Beirut, Bekaa, South & North                                   | EMR  | LMIC | 2005      | Random | 13-14        | Ever wheezing          |
| Dales, R. E., et al.      | 1994 | Canada     | British Columbia, Saskatchewan, Ontario, Quebec, and Maritimes | AMR  | HIC  | 1988      | Random | 5-8          | Ever diagnosed asthma  |
| Bartlett, E., et al.      | 2013 | Bangladesh | Abhoynagar, Mirsarai & Kamalapur                               | SEAR | LMIC | 2009      | Random | 25-65>       | Ever diagnosed asthma  |
| Perez-Perdomo, R., et al. | 2003 | US         | Puerto Rico                                                    | AMR  | HIC  | 2000      | Random | 18 and above | Ever diagnosed asthma  |
| Nafti, S., et al.         | 2009 | Algeria    | Algeria                                                        | AFR  | LMIC | 2008      | Random | 16 and above | Newly diagnosed asthma |
| Nafti, S., et al.         | 2009 | Morocco    | Morocco                                                        | EMR  | LMIC | 2008      | Random | 16 and above | Newly diagnosed asthma |
| Nafti, S., et al.         | 2009 | Tunisia    | Tunisia                                                        | EMR  | LMIC | 2008      | Random | 16 and above | Newly diagnosed asthma |
| Manfreda, J., et al.      | 2001 | Canada     | Vancouver, Winnipeg, Hamilton, Montreal, Halifax and           | AMR  | HIC  | 1993-1994 | Random | 20-44        | Current wheezing       |

| Author                 | Year Published | Country | Study site                         | WHO Region | WB Income Region | Investigation Date | Sampling Strategy | Age range | Group            |
|------------------------|----------------|---------|------------------------------------|------------|------------------|--------------------|-------------------|-----------|------------------|
| Linehan, M. F., et al. | 2009           | UK      | Prince Edward Island<br>Manchester | EUR        | HIC              | 2002-2004          | Random            | 6-11      | Current wheezing |
| Song, N., et al.       | 2014           | China   | Shijiazhuang in Hebei province     | WPR        | LMIC             | 2011               | Random            | 6-18      | Ever wheezing    |

|                            |      |         |                                                                                       |     |      |                   |        |             |                        |
|----------------------------|------|---------|---------------------------------------------------------------------------------------|-----|------|-------------------|--------|-------------|------------------------|
| Sole, D., et al.           | 2014 | Brazil  | Brazil                                                                                | AMR | LMIC | NA                | Random | 6-7 & 13-14 | Current wheezing       |
| Ronmark, E., et al.        | 2001 | Sweden  | Kiruna, Luleå, and Piteå in northern Sweden                                           | EUR | HIC  | 1996 & 1997       | Random | 7-8         | Ever diagnosed asthma  |
| Brozek, G., et al.         | 2016 | Belarus | Grodno                                                                                | EUR | LMIC | NA                | Random | 7-13        | Ever diagnosed asthma  |
| Brozek, G., et al.         | 2016 | Belarus | Grodno                                                                                | EUR | LMIC | NA                | Random | 7-13        | Ever diagnosed asthma  |
| Brozek, G., et al.         | 2016 | Ukraine | Ternopil                                                                              | EUR | LMIC | NA                | Random | 7-13        | Ever diagnosed asthma  |
| Brozek, G., et al.         | 2016 | Ukraine | Ternopil                                                                              | EUR | LMIC | NA                | Random | 7-13        | Ever diagnosed asthma  |
| Brozek, G., et al.         | 2016 | Poland  | Katowice                                                                              | EUR | HIC  | NA                | Random | 7-13        | Ever diagnosed asthma  |
| Brozek, G., et al.         | 2016 | Poland  | Katowice                                                                              | EUR | HIC  | NA                | Random | 7-13        | Ever diagnosed asthma  |
| Portnov, B. A., et al.     | 2012 | Israel  | Haifa, Qiryat Tivon, Nesher, Qiryat Ata, Qiryat Motzkin, Qiryat Bialik and Qiryat Yam | EUR | HIC  | 2008-2009         | Random | 6-15        | Ever diagnosed asthma  |
| Chrischilles, E., et al.   | 2004 | US      | Iowa                                                                                  | AMR | HIC  | 1999-2002         | Random | 6-14        | Ever wheezing          |
| Anthracopoulos, M., et al. | 2001 | Greece  | Patras                                                                                | EUR | HIC  | 1978, 1991 & 1998 | Random | 8-10        | Current wheezing       |
| de Marco, R., et al.       | 2012 | Italy   | Ferrara, Pavia, Pisa, Sassari, Sassuolo, Siracusa, Turin,                             | EUR | HIC  | 1990-2010         | Random | 20-44       | Newly diagnosed asthma |

| Author | Year Published | Country | Study site | WHO Region | WB Income Region | Investigation Date | Sampling Strategy | Age range | Group |
|--------|----------------|---------|------------|------------|------------------|--------------------|-------------------|-----------|-------|
|--------|----------------|---------|------------|------------|------------------|--------------------|-------------------|-----------|-------|

Udine and Verona.

|                        |      |           |                                                                                             |     |      |           |        |               |                       |
|------------------------|------|-----------|---------------------------------------------------------------------------------------------|-----|------|-----------|--------|---------------|-----------------------|
| Muc, M., et al.        | 2014 | Portugal  | Coimbra                                                                                     | EUR | HIC  | 2012      | Random | 6-8           | Ever wheezing         |
| Tai, A., et al.        | 2009 | Australia | South Australia                                                                             | WPR | HIC  | 2006      | Random | 4-5           | Current wheezing      |
| von Maffei, J., et al. | 2001 | US        | Virginia and Connecticut                                                                    | AMR | HIC  | 1993-1996 | Random | 0-18          | Ever diagnosed asthma |
| Tug, T. and Y. Acik    | 2002 | Turkey    | Elazig Region                                                                               | EUR | LMIC | 2002      | Random | NA            | Ever wheezing         |
| Sy, D. Q., et al.      | 2007 | Vietnam   | Dalat Highlands                                                                             | WPR | LMIC | 2004      | Random | NA            | Ever diagnosed asthma |
| Erhabor, G. E., et al. | 2016 | Nigeria   | Obafemi Awolowo University, Ileife                                                          | AFR | LMIC | 2012      | Random | 15-39 & 22-73 | Current wheezing      |
| Chang, H. J., et al.   | 2012 | Canada    | Canada                                                                                      | AMR | HIC  | 2006-2007 | Random | 6-14 & 15-64  | Ever diagnosed asthma |
| Duhme, H., et al.      | 1998 | Germany   | Münster, western Germany, and Greifswald, eastern Germany                                   | EUR | HIC  | 1994-1995 | Random | 5-8 & 12-15   | Ever wheezing         |
| Lin, J., et al.        | 2018 | China     | Mainland China (Beijing, Shanghai, Jiangsu, Guangdong, Liaoning, Sichuan, Henan and Shanxi) | WPR | LMIC | 2010-2012 | Random | 15 & above    | Ever diagnosed asthma |
| Lin, R., et al.        | 2014 | China     | Qingdao                                                                                     | WPR | LMIC | 2010-2011 | Random | 1-14          | Ever diagnosed asthma |
| Saraclar, Y., et al.   | 1997 | Turkey    | Ankara                                                                                      | EUR | LMIC | 1991-1992 | Random | 6-13          | Ever diagnosed asthma |

| Author | Year Published | Country | Study site | WHO Region | WB Income Region | Investigation Date | Sampling Strategy | Age range | Group |
|--------|----------------|---------|------------|------------|------------------|--------------------|-------------------|-----------|-------|
|--------|----------------|---------|------------|------------|------------------|--------------------|-------------------|-----------|-------|

|                        |      |           |           |      |      |           |        |             |                        |
|------------------------|------|-----------|-----------|------|------|-----------|--------|-------------|------------------------|
| Erhabor, G. E., et al. | 2006 | Nigeria   | Ile-Ife   | AFR  | LMIC | NA        | Random | 15-35       | Current wheezing       |
| Sharma, B. S., et al.  | 2012 | India     | Jaipur    | SEAR | LMIC | 2008-2009 | Random | 5-15        | Ever wheezing          |
| Sole, D., et al.       | 1999 | Brazil    | Sao Paulo | AMR  | LMIC | 1995      | Random | 6-7 & 13-14 | Ever wheezing          |
| Kraai, S., et al.      | 2013 | Venezuela | Warao     | AMR  | LMIC | 2012      | Random | 2-10        | Ever wheezing          |
| Ormerod, L. P., et al. | 1999 | UK        | Blackburn | EUR  | HIC  | 1990-1991 | Random | 0 & above   | Ever wheezing          |
| Solet, J. L., et al.   | 2019 | France    | Reunion   | EUR  | HIC  | 2016      | Random | 18-44       | Newly diagnosed asthma |
| Timonen, K. L., et al. | 1995 | Finland   | Kuopio    | EUR  | HIC  | 1993-1994 | Random | 7-12        | Newly diagnosed asthma |
| Saraclar, Y., et al.   | 1998 | Turkey    | Ankara    | EUR  | LMIC | 1996      | Random | 7-14        | Ever wheezing          |
| Saraclar, Y., et al.   | 1998 | Turkey    | Ankara    | EUR  | LMIC | 1996      | Random | 7-14        | Ever diagnosed asthma  |
| Saraclar, Y., et al.   | 1998 | Turkey    | Ankara    | EUR  | LMIC | 1996      | Random | 7-14        | Current wheezing       |
| Saraclar, Y., et al.   | 1998 | Turkey    | Ankara    | EUR  | LMIC | 1996      | Random | 7-14        | Newly diagnosed asthma |

**Table S6. List of the included articles**

1. Hedman, J., et al. (1999). "Prevalence of asthma, aspirin intolerance, nasal polyposis and chronic obstructive pulmonary disease in a population-based study." *International Journal of Epidemiology* 28(4): 717-722.
2. Salem, M. B., et al. (2002). "Prevalence of wheeze among preschool children in Basra governonate, southern Iraq." *Eastern Mediterranean Health Journal* 8(4-5): 503-508.
3. Obaseki, D. O., et al. (2014). "Low prevalence of asthma in sub Saharan Africa: a cross sectional community survey in a suburban Nigerian town." *Respiratory Medicine* 108(11): 1581-1588.
4. Horak, E., et al. (2014). "Prevalence of wheezing and atopic diseases in Austrian schoolchildren in conjunction with urban, rural or farm residence." *Wiener Klinische Wochenschrift* 126(17-18): 532-536.
5. Anderson, H. R., et al. (1994). "Trends in prevalence and severity of childhood asthma." *BMJ* 308(6944): 1600-1604.

- 
6. Crain, E. F., et al. (1994). "An estimate of the prevalence of asthma and wheezing among inner-city children." *Pediatrics* 94(3): 356-362.

---

  7. Kirenga, B. J., et al. (2019). "Prevalence and factors associated with asthma among adolescents and adults in Uganda: a general population based survey." *BMC Public Health* 19(1): 227.

---

  8. Seneviratne, R. and N. S. Gunawardena (2018). "Prevalence and associated factors of wheezing illnesses of children aged three to five years living in under-served settlements of the Colombo Municipal Council in Sri Lanka: a cross-sectional study." *BMC Public Health* 18(1): 127.

---

  9. Yawn, B. P., et al. (2002). "A longitudinal study of the prevalence of asthma in a community population of school-age children." *Journal of Pediatrics* 140(5): 576-581.

---

  10. Bjorksten, B., et al. (1998). "Prevalence of childhood asthma, rhinitis and eczema in Scandinavia and Eastern Europe." *European Respiratory Journal* 12(2): 432-437.

---

  11. Barry, D. M., et al. (1991). "Prevalence of asthma among 12 year old children in New Zealand and South Wales: a comparative survey." *Thorax* 46(6): 405-409.

---

  12. Akkurt, I., et al. (2003). "Prevalence of asthma and related symptoms in Sivas, Central Anatolia." *Journal of Asthma* 40(5): 551-556.

---

  13. Isoaho, R., et al. (1994). "Prevalence of asthma in elderly Finns." *Journal of Clinical Epidemiology* 47(10): 1109-1118.

---

  14. Papageorgiou, N., et al. (1997). "Prevalence of asthma and asthma-like symptoms in Athens, Greece." *Respiratory Medicine* 91(2): 83-88

---

  15. Brozek, G., et al. (2015). "Increasing prevalence of asthma, respiratory symptoms, and allergic diseases: Four repeated surveys from 1993-2014." *Respiratory Medicine* 109(8): 982-990.

---

  16. Bechtold, P., et al. (2013). "Assessing paediatric asthma occurrence through dispensed prescription data and questionnaires." *European Journal of Public Health* 23(5): 873-878.

---

  17. Nriagu, J., et al. (1999). "Prevalence of asthma and respiratory symptoms in south-central Durban, South Africa." *European Journal of Epidemiology* 15(8): 747-755

---

  18. Anderson, H. R., et al. (2004). "Trends in prevalence of symptoms of asthma, hay fever, and eczema in 12-14 year olds in the British Isles, 1995-2002: questionnaire survey." *BMJ* 328(7447): 1052-1053.

---

  19. Mallol, J., et al. (2010). "International prevalence of recurrent wheezing during the first year of life: variability, treatment patterns and use of health resources." *Thorax* 65(11): 1004-1009
-



---

20. Johnson, M., et al. (2005). "Asthma prevalence and severity in Arab American communities in the Detroit area, Michigan." *Journal of Immigrant Health* 7(3): 165-178.

---

21. Solis Soto, M. T., et al. (2014). "Prevalence of asthma, rhinitis and eczema symptoms in rural and urban school-aged children from Oropeza Province - Bolivia: a cross-sectional study." *BMC Pulmonary Medicine* 14: 40

---

22. Mattei, A., et al. (2007). "[Prevalence of asthma, respiratory symptoms and allergic disorders among adolescents in the province of Aquila]." *Epidemiologia e Prevenzione* 31(5): 247-252.

- 
23. Lee, S. I., et al. (2001). "Prevalences of symptoms of asthma and other allergic diseases in Korean children: a nationwide questionnaire survey." *Journal of Korean Medical Science* 16(2): 155-164.
- 
24. Lima, W. L., et al. (2012). "[Asthma and associated factors in students 13 and 14 years of age in Sao Luis, Maranhao State, Brazil]." *Cadernos de Saude Publica* 28(6): 1046-1056
- 
25. Hansen, E. F., et al. (2000). "Increase in prevalence and severity of asthma in young adults in Copenhagen." *Thorax* 55(10): 833-836.
- 
26. Fukutomi, Y., et al. (2011). "Time trend in the prevalence of adult asthma in Japan: findings from population-based surveys in Fujiyama City in 1985, 1999, and 2006." *Allergy International* 60(4): 443-448.
- 
27. Al Ghobain, M. O., et al. (2012). "Asthma prevalence among 16- to 18-year-old adolescents in Saudi Arabia using the ISAAC questionnaire." *BMC Public Health* 12: 239.
- 
28. Kausel, L., et al. (2013). "Childhood asthma and allergies in urban, semiurban, and rural residential sectors in Chile." *TheScientificWorldJournal* 2013: 937935
- 
29. von Mutius, E., et al. (1992). "Prevalence of asthma and allergic disorders among children in united Germany: a descriptive comparison." *BMJ* 305(6866): 1395-1399.
- 
30. Alves, J., et al. (1994). "[Prevalence of asthma in the city of Porto]." *Acta Medica Portuguesa* 7(1): 21-24.
- 
31. Liao, M. F., et al. (2005). "Prevalence of asthma, rhinitis, and eczema from ISAAC survey of schoolchildren in Central Taiwan." *Journal of Asthma* 42(10): 833-837.
- 
32. Ehrlich, R. I., et al. (1995). "Prevalence and reliability of asthma symptoms in primary school children in Cape Town." *International Journal of Epidemiology* 24(6): 1138-1145.
- 
33. Arnedo-Pena, A., et al. (2011). "Sunny hours and variations in the prevalence of asthma in schoolchildren according to the International Study of Asthma and Allergies (ISAAC) Phase III in Spain." *International Journal of Biometeorology* 55(3): 423-434.
- 
34. Nugmanova, D., et al. (2018). "The prevalence, burden and risk factors associated with bronchial asthma in commonwealth of independent states countries (Ukraine, Kazakhstan and Azerbaijan): results of the CORE study." *BMC Pulmonary Medicine* 18(1): 110.
- 
35. Cazzola, M., et al. (2011). "The prevalence of asthma and COPD in Italy: a practice-based study." *Respiratory Medicine* 105(3): 386-391.
- 
36. Heinrich, J., et al. (2002). "Trends in prevalence of atopic diseases and allergic sensitization in children in Eastern Germany." *European Respiratory Journal* 19(6): 1040-1046.

- 
- 
37. James, A. L., et al. (2010). "Changes in the prevalence of asthma in adults since 1966: the Busselton health study." *European Respiratory Journal* 35(2): 273-278.
- 
38. Ronchetti, R., et al. (2001). "Is the increase in childhood asthma coming to an end? Findings from three surveys of schoolchildren in Rome, Italy." *European Respiratory Journal* 17(5): 881-886.
- 
39. Wang, X. S., et al. (2004). "The prevalence of asthma and allergies in Singapore; data from two ISAAC surveys seven years apart." *Archives of Disease in Childhood* 89(5): 423-426.
- 
40. Bemanin, M. H., et al. (2015). "First report of asthma prevalence in Afghanistan using international standardized methods." *Eastern Mediterranean Health Journal* 21(3): 194-198.
- 
41. Robertson, C. F., et al. (1991). "Prevalence of asthma in Melbourne schoolchildren: changes over 26 years." *BMJ* 302(6785): 1116-1118.
- 
42. Asthma and its comorbidities in middle-aged and older adults; the Rotterdam Study
- 
43. Toelle, B. G., et al. (2004). "Prevalence of asthma and allergy in schoolchildren in Belmont, Australia: three cross sectional surveys over 20 years." *BMJ* 328(7436): 386-387.
- 
44. Brunner, W. M., et al. (2005). "Asthma among rural Minnesota adolescents." *Journal of Asthma* 42(9): 787-792.
- 
45. Hasnain, S. M., et al. (2009). "Prevalence of asthma and allergic rhinitis among school children of Karachi, Pakistan, 2007." *Journal of Asthma* 46(1): 86-90.
- 
46. Reis, G. G., et al. (2015). "Prevalence and risk factors for wheezing in Salvador, Brazil: a population-based study." *Qjm* 108(3): 213-218.
- 
47. Nguyen, T., et al. (2015). "The prevalence of asthma risk and contributing factors in underserved Vietnamese children in Orange County, CA." *Journal of Asthma* 52(10): 1031-1037.
- 
48. Huurre, T. M., et al. (2004). "Incidence and prevalence of asthma and allergic rhinitis: a cohort study of Finnish adolescents." *Journal of Asthma* 41(3): 311-317.
- 
49. Ozdemir, N., et al. (2000). "The prevalence of asthma and allergy among university freshmen in Eskisehir, Turkey." *Respiratory Medicine* 94(6): 536-541.
- 
50. Liao, M. F., et al. (2009). "Prevalence of allergic diseases of schoolchildren in central taiwan. From ISAAC surveys 5 years apart." *Journal of Asthma* 46(6): 541-545.
-

- 
51. Strachan, D. P., et al. (1994). "A national survey of asthma prevalence, severity, and treatment in Great Britain." *Archives of Disease in Childhood* 70(3): 174-178.
- 
52. Weiland, S. K., et al. (1999). "Prevalence of respiratory and atopic disorders among children in the East and West of Germany five years after unification." *European Respiratory Journal* 14(4): 862-870.
- 
53. Ronmark, E., et al. (2002). "Incidence rates and risk factors for asthma among school children: a 2-year follow-up report from the obstructive lung disease in Northern Sweden (OLIN) studies." *Respiratory Medicine* 96(12): 1006-1013.
- 
54. Saraclar, Y., et al. (1997). "The prevalence of self-reported asthma and respiratory symptoms in Ankara, Turkey." *Respiratory Medicine* 91(8): 461-463.
- 
55. Nishima, S., et al. (2009). "Surveys on the prevalence of pediatric bronchial asthma in Japan: a comparison between the 1982, 1992, and 2002 surveys conducted in the same region using the same methodology." *Allergology International* 58(1): 37-53.
- 
56. Lee, T., et al. (2003). "Asthma prevalence among inner-city Asian American schoolchildren." *Public Health Reports* 118(3): 215-220.
- 
57. Vanfleteren, L. E., et al. (2012). "The prevalence of chronic obstructive pulmonary disease in Maastricht, the Netherlands." *Respiratory Medicine* 106(6): 871-874.
- 
58. Renwick, D. S. and M. J. Connolly (1996). "Prevalence and treatment of chronic airways obstruction in adults over the age of 45." *Thorax* 51(2): 164-168.
- 
59. Matsumoto, K., et al. (2015). "Prevalence of asthma with airflow limitation, COPD, and COPD with variable airflow limitation in older subjects in a general Japanese population: the Hisayama Study." *Respiratory Investigation* 53(1): 22-29.
- 
60. Carlsson, A. C., et al. (2013). "High prevalence of diagnosis of diabetes, depression, anxiety, hypertension, asthma and COPD in the total population of Stockholm, Sweden - a challenge for public health." *BMC Public Health* 13: 670.
- 
61. Maia, J. G., et al. (2004). "Prevalence of asthma and asthma symptoms among 13 and 14-year-old schoolchildren, Brazil." *Revista de Saude Publica* 38(2): 292-299.
- 
62. Kiboneka, A., et al. (2016). "Prevalence of asthma among school children in Gaborone, Botswana." *African Health Sciences* 16(3): 809-816.
- 
63. Hu, F. B., et al. (1997). "An epidemiological study of asthma prevalence and related factors among young adults." *Journal of Asthma* 34(1): 67-76.
-

- 
- 
64. Pakhale, S., et al. (2008). "Prevalence of asthma symptoms in 7th- and 8th-grade school children in a rural region in India." *Journal of Asthma* 45(2): 117-122.
- 
65. Lawson, J. A., et al. (2017). "Childhood asthma, asthma severity indicators, and related conditions along an urban-rural gradient: a cross-sectional study." *BMC Pulmonary Medicine* 17(1): 4.
- 
66. Rizwan, S., et al. (2004). "Trends in childhood and parental asthma prevalence in Merseyside, 1991-1998." *Journal of Public Health* 26(4): 337-342.
- 
67. Freitas, M. S., et al. (2012). "Prevalence of asthma symptoms and associated factors in schoolchildren from Brazilian Amazon islands." *Journal of Asthma* 49(6): 600-605.
- 
68. Findley, S., et al. (2003). "Elevated asthma and indoor environmental exposures among Puerto Rican children of East Harlem." *Journal of Asthma* 40(5): 557-569.
69. Simon, P. A., et al. (2003). "Prevalence of childhood asthma and associated morbidity in Los Angeles County: impacts of race/ethnicity and income." *Journal of Asthma* 40(5): 535-543.
- 
70. Hoffmann, F. (2007). "Prevalence of asthma among German adults: analysis of the German National Telephone Survey." *Journal of Asthma* 44(6): 433-436.
- 
71. Claudio, L., et al. (2006). "Prevalence of childhood asthma in urban communities: the impact of ethnicity and income." *Annals of Epidemiology* 16(5): 332-340.
- 
72. Silva Rde, C., et al. (2013). "The prevalence of wheezing and its association with body mass index and abdominal obesity in children." *Journal of Asthma* 50(3): 267-273.
- 
73. Bryant-Stephens, T., et al. (2012). "Asthma prevalence in Philadelphia: description of two community-based methodologies to assess asthma prevalence in an inner-city population." *Journal of Asthma* 49(6): 581-585.
- 
74. Goh, D. Y., et al. (1996). "Prevalence and severity of asthma, rhinitis, and eczema in Singapore schoolchildren." *Archives of Disease in Childhood* 74(2): 131-135.
- 
75. Carrillo, G., et al. (2018). "Asthma prevalence and school-related hazardous air pollutants in the US-Mexico border area." *Environmental Research* 162: 41-48.
- 
76. Mallol, J., et al. (2010). "Regional variation in asthma symptom prevalence in Latin American children." *Journal of Asthma* 47(6): 644-650.
- 
77. Romano-Zelekha, O., et al. (2007). "Trends in the prevalence of asthma symptoms and allergic diseases in Israeli adolescents: results from a national survey 2003 and comparison with 1997." *Journal of Asthma* 44(5): 365-369.
- 
-

- 
78. El Ftouh, M., et al. (2009). "Paediatric asthma in North Africa: the Asthma Insights and Reality in the Maghreb (AIRMAG) study." *Respiratory Medicine* 103 Suppl 2: S21-29.
- 
79. Stojanovic-Ristic, S., et al. (2006). "[Prevalence of asthma in college student population]." *Srpski Arhiv Za Celokupno Lekarstvo* 134(9-10): 398-403.
- 
80. Shamssain, M. H. and N. Shamsian (1999). "Prevalence and severity of asthma, rhinitis, and atopic eczema: the north east study." *Archives of Disease in Childhood* 81(4): 313-317.
- 
81. Kim, S. Y., et al. (2013). "Increased prevalence of self-reported asthma among Korean adults: an analysis of KNHANES I and IV data." *Lung* 191(3): 281-288.
- 
82. Romantowski, J., et al. (2015). "Asthma prevalence and risk factors analysis in Tricity university students' group." *Pneumonologia i Alergologia Polska* 83(5): 359-364.
- 
83. Brugge, D., et al. (2008). "Community-level data suggest that asthma prevalence varies between U.S. and foreign-born black subpopulations." *Journal of Asthma* 45(9): 785-789.
- 
84. Shimwela, M., et al. (2014). "Asthma prevalence, knowledge, and perceptions among secondary school pupils in rural and urban coastal districts in Tanzania." *BMC Public Health* 14: 387.
- 
85. Senthilselvan, A., et al. (2016). "Prevalence and risk factors of asthma in First Nations children living on reserves in Canada." *Canadian Journal of Public Health. Revue Canadienne de Sante Publique* 106(8): e483-488.
- 
86. Ziyab, A. H. (2017). "Prevalence and Risk Factors of Asthma, Rhinitis, and Eczema and Their Multimorbidity among Young Adults in Kuwait: A Cross-Sectional Study." *BioMed Research International* 2017: 2184193.
- 
87. Kainu, A., et al. (2013). "Increase in prevalence of physician-diagnosed asthma in Helsinki during the Finnish Asthma Programme: improved recognition of asthma in primary care? A crosssectional cohort study." *Primary Care Respiratory Journal* 22(1): 64-71.
- 
88. Gershon, A. S., et al. (2010). "Trends in asthma prevalence and incidence in Ontario, Canada, 1996-2005: a population study." *American Journal of Epidemiology* 172(6): 728-736.
- 
89. Gershon, A. S., et al. (2010). "Trends in asthma prevalence and incidence in Ontario, Canada, 1996-2005: a population study." *American Journal of Epidemiology* 172(6): 728-736.
- 
90. Singh, S., et al. (2016). "Prevalence and severity of asthma among Indian school children aged between 6 and 14 years: associations with parental smoking and traffic pollution." *Journal of Asthma* 53(3): 238-244.
- 
91. Peroni, D. G., et al. (2009). "Preschool asthma in Italy: prevalence, risk factors and health resource utilization." *Respiratory Medicine* 103(1): 104-108.
-

- 
92. Kaur, B., et al. (1998). "Prevalence of asthma symptoms, diagnosis, and treatment in 12-14 year old children across Great Britain (international study of asthma and allergies in childhood, ISAAC UK)." *BMJ* 316(7125): 118-124.
- 
93. Kuehni, C. E., et al. (2000). "Prevalence of wheeze during childhood: retrospective and prospective assessment." *European Respiratory Journal* 16(1): 81-85.
- 
94. Delmas, M. C., et al. (2009). "[Prevalence of asthma among children in France]." *Archives de Pediatrie* 16(9): 1261-1269.
- 
95. Werneck, G., et al. (1999). "Prevalence of asthma and other childhood allergies in Brazilian schoolchildren." *Journal of Asthma* 36(8): 677-690.
- 
96. Norzila, M. Z., et al. (2000). "Prevalence of childhood asthma and allergy in an inner city Malaysian community: intra-observer reliability of two translated international questionnaires." *Medical Journal of Malaysia* 55(1): 33-39.
- 
97. Ngui, R., et al. (2011). "Prevalence of bronchial asthma among orang asli in peninsular malaysia." *Medical Journal of Malaysia* 66(1): 27-31.
- 
98. El Burai Felix, S., et al. (2015). "Asthma prevalence among Hispanic adults in Puerto Rico and Hispanic adults of Puerto Rican descent in the United States - results from two national surveys." *Journal of Asthma* 52(1): 3-9.
- 
99. Anthracopoulos, M. B., et al. (2007). "Prevalence of asthma among schoolchildren in Patras, Greece: four questionnaire surveys during 1978-2003." *Archives of Disease in Childhood* 92(3): 209-212.
- 
100. Lamnisos, D., et al. (2013). "Prevalence of asthma and allergies in children from the Greek-Cypriot and Turkish-Cypriot communities in Cyprus: a bi-communal cross-sectional study." *BMC Public Health* 13: 585.
- 
101. Bishwajit, G., et al. (2017). "Burden of asthma, dyspnea, and chronic cough in South Asia." *International Journal of Copd* 12: 1093-1099.
- 
102. Austin, J. B., et al. (1994). "Prevalence of asthma and wheeze in the Highlands of Scotland." *Archives of Disease in Childhood* 71(3): 211-216.
- 
103. Moradi-Lakeh, M., et al. (2015). "Prevalence of asthma in Saudi adults: findings from a national household survey, 2013." *BMC Pulmonary Medicine* 15: 77.
- 
104. Fedortsiv, O., et al. (2012). "Prevalence of childhood asthma, rhinitis, and eczema in the Ternopil region of Ukraine--results of BUPAS study." *Advances in Medical Sciences* 57(2): 282-289.
- 
-

- 
105. Trakultivakorn, M., et al. (2007). "Time trends of the prevalence of asthma, rhinitis and eczema in Thai children-ISAAC (International Study of Asthma and Allergies in Childhood) Phase Three." *Journal of Asthma* 44(8): 609-611.
- 
106. Gupta, D., et al. (2001). "Prevalence of bronchial asthma and association with environmental tobacco smoke exposure in adolescent school children in Chandigarh, north India." *Journal of Asthma* 38(6): 501-507.
- 
107. Musafiri, S., et al. (2011). "Prevalence of atopy, asthma and COPD in an urban and a rural area of an African country." *Respiratory Medicine* 105(11): 1596-1605.
- 
108. Kim, J. L., et al. (2014). "Trends in the prevalence of asthma, rhinitis, and eczema in 15 year old adolescents over an 8 year period." *Respiratory Medicine* 108(5): 701-708.
- 
109. Greenlee, R. T., et al. (2008). "Prevalence of asthma in a general population cohort of farm children: comparison of estimates based on parental report and medical record review." *Journal of Agromedicine* 13(4): 225-231.
- 
110. Ma, Q. and T. Yang (2017). "[Prevalence and influential factors for asthma among adults in Chinese]." *Zhong Nan da Xue Xue Bao. Yi Xue Ban = Journal of Central South University. Medical Sciences* 42(9): 1086-1093.
- 
111. Middleton, N., et al. (2014). "Prevalence of asthma and respiratory symptoms in 15-17 year-old Greek-Cypriots by proximity of their community of residence to power plants: Cyprus 2006-07." *Public Health* 128(3): 288-296.
- 
112. Shakurnia, A. H., et al. (2010). "Prevalence of asthma among schoolchildren in Ahvaz, Islamic Republic of Iran." *Eastern Mediterranean Health Journal* 16(6): 651-656.
- 
113. Jarvis, D., et al. (1994). "Prevalence of asthma and asthma-like symptoms in young adults living in three east Anglian towns." *British Journal of General Practice* 44(388): 493-497.
- 
114. Glushkova, A. V. and A. M. Grijbovski (2008). "Prevalence and correlates of asthma among children in central St. Petersburg, Russia: cross-sectional study." *Croatian Medical Journal* 49(6): 741750.
115. Nystad, W., et al. (1997). "Changing prevalence of asthma in school children: evidence for diagnostic changes in asthma in two surveys 13 yrs apart." *European Respiratory Journal* 10(5): 10461051.
- 
116. Rose, D., et al. (2006). "Asthma prevalence among US adults, 1998-2000: role of Puerto Rican ethnicity and behavioral and geographic factors." *American Journal of Public Health* 96(5): 880-888.
- 
117. Jindal, S. K., et al. (2000). "Study of the prevalence of asthma in adults in North India using a standardized field questionnaire." *Journal of Asthma* 37(4): 345-351.
- 
-



- 
118. Peat, J. K., et al. (1994). "Changing prevalence of asthma in Australian children." *BMJ* 308(6944): 1591-1596. OBJECTIVE: To investigate whether prevalence of asthma in children increased in 10 years.
- 
119. Gao, Z., et al. (2008). "Prevalence of asthma and risk factors for asthma-like symptoms in Aboriginal and non-Aboriginal children in the northern territories of Canada." *Canadian Respiratory Journal* 15(3): 139-145.
- 
120. Jerning, C., et al. (2013). "Asthma and physical activity--a population based study results from the Swedish GA(2)LEN survey." *Respiratory Medicine* 107(11): 1651-1658.
- 
121. Wehrmeister, F. C. and K. G. Peres (2010). "[Regional inequalities in the prevalence of asthma diagnosis in children: an analysis of the Brazilian National Household Sample Survey, 2003]." *Cadernos de Saude Publica* 26(9): 1839-1852.
- 
122. Al Ghobain, M. O., et al. (2012). "Asthma prevalence among 16- to 18-year-old adolescents in Saudi Arabia using the ISAAC questionnaire." *BMC Public Health* 12: 239.
- 
123. Barraza Villarreal, A., et al. (2003). "Risk factors for asthma in school children from Ciudad Juarez, Chihuahua." *Journal of Asthma* 40(4): 413-423.
- 
124. Tan, T. N., et al. (2006). "Prevalence of asthma and comorbid allergy symptoms in Singaporean preschoolers." *Asian Pacific Journal of Allergy & Immunology* 24(4): 175-182.
- 
125. Sole, D., et al. (2015). "Prevalence of asthma and related symptoms in adolescents: findings from 3 surveys." *Journal of Investigational Allergology & Clinical Immunology* 25(1): 73-74.
- 
126. Kabesch, M., et al. (1999). "Lower prevalence of asthma and atopy in Turkish children living in Germany." *European Respiratory Journal* 13(3): 577-582.
- 
127. Broman, K., et al. (2012). "A nationwide study of asthma incidence rate and its determinants in Swedish pre-school children." *European Journal of Epidemiology* 27(9): 695-703.
- 
128. Chan-Yeung, M., et al. (2002). "The prevalence of asthma and asthma-like symptoms among adults in rural Beijing, China." *European Respiratory Journal* 19(5): 853-858.
- 
129. Mvula, M., et al. (2005). "Prevalence of asthma and asthma-like symptoms in inner-city schoolchildren." *Journal of Asthma* 42(1): 9-16.
- 
130. Joseph, C. L., et al. (1996). "Prevalence of possible undiagnosed asthma and associated morbidity among urban schoolchildren." *Journal of Pediatrics* 129(5): 735-742.
- 
131. Pekkanen, J., et al. (1997). "Prevalence of asthma symptoms in video and written questionnaires among children in four regions of Finland." *European Respiratory Journal* 10(8): 1787-1794.
-

- 
132. Habbick, B. F., et al. (1999). "Prevalence of asthma, rhinitis and eczema among children in 2 Canadian cities: the International Study of Asthma and Allergies in Childhood." *CMAJ Canadian Medical Association Journal* 160(13): 1824-1828.
- 
133. Shohat, T., et al. (2000). "Prevalence of asthma in 13-14 yr-old schoolchildren across Israel." *European Respiratory Journal* 15(4): 725-729.
- 
134. Leung, R., et al. (1994). "Prevalence of asthma and wheeze in Hong Kong schoolchildren: an international comparative study." *European Respiratory Journal* 7(11): 2046-2049.
- 
135. Yeatts, K. B. and C. M. Shy (2001). "Prevalence and consequences of asthma and wheezing in African-American and White adolescents." *Journal of Adolescent Health* 29(5): 314-319.
- 
136. Arif, A. A., et al. (2005). "A population-based study of asthma, quality of life, and occupation among elderly Hispanic and non-Hispanic whites: a cross-sectional investigation." *BMC Public Health* 5: 97.
- 
137. Meren, M., et al. (2005). "Low prevalence of asthma in westernizing countries-myth or reality? Prevalence of asthma in Estonia--a report from the "FinEss" study." *Journal of Asthma* 42(5): 357365
138. Larsson, L. (1995). "Incidence of asthma in Swedish teenagers: relation to sex and smoking habits." *Thorax* 50(3): 260-264.
- 
139. Rona, R. J., et al. (1995). "Trends in the prevalence of asthma in Scottish and English primary school children 1982-92." *Thorax* 50(9): 992-993.
- 
140. Mellinger-Birdsong, A. K., et al. (2003). "Prevalence and impact of asthma in children, Georgia, 2000." *American Journal of Preventive Medicine* 24(3): 242-248.
- 
141. Dow, L., et al. (2001). "Prevalence of untreated asthma in a population sample of 6000 older adults in Bristol, UK." *Thorax* 56(6): 472-476.
- 
142. Unlu, M., et al. (2002). "The prevalence of asthma among secondary school students in Afyon, Turkey." *Asian Pacific Journal of Allergy & Immunology* 20(1): 1-6.
- 
143. Al Ghobain, M. O., et al. (2018). "Asthma prevalence among adults in Saudi Arabia." *Saudi Medical Journal* 39(2): 179-184.
- 
144. McCann, D., et al. (2002). "The prevalence and management of asthma in primary-aged schoolchildren in the south of England." *Health Education Research* 17(2): 181-194.
- 
145. Pallasaho, P., et al. (2002). "Prevalence and risk factors for asthma and chronic bronchitis in the capitals Helsinki, Stockholm, and Tallinn." *Respiratory Medicine* 96(10): 759-769.
-

- 
- 
146. Khan, A. A., et al. (2014). "Burden of asthma among children in a developing megacity: childhood asthma study, Pakistan." *Journal of Asthma* 51(9): 891-899.
- 
147. Aberle, N., et al. (2018). "Allergic Diseases and Atopy Among Schoolchildren in Eastern Croatia." *Acta Clinica Croatica* 57(1): 82-90.
- 
148. Valery, P. C., et al. (2001). "High prevalence of asthma in five remote indigenous communities in Australia." *European Respiratory Journal* 17(6): 1089-1096
- 
149. Kurukulaaratchy, R. J., et al. (2002). "The prevalence of asthma and wheezing illnesses amongst 10-year-old schoolchildren." *Respiratory Medicine* 96(3): 163-169.
- 
150. Leung, R. and P. Ho (1994). "Asthma, allergy, and atopy in three south-east Asian populations." *Thorax* 49(12): 1205-1210.
- 
151. Letamo, G., et al. (2017). "Prevalence and correlates of self-reported chronic non-communicable diseases in Botswana: a cross-sectional study." *International Health* 9(1): 11-19.
- 
152. Yoshihara, S., et al. (2016). "Prevalence of childhood asthma in Ulaanbaatar, Mongolia in 2009." *Allergology International* 65(1): 62-67.
- 
153. Levesque, B., et al. (2004). "Asthma and allergic rhinitis in Quebec children." *Canadian Respiratory Journal* 11(5): 343-348.
- 
154. Schuh, C., et al. (2015). "The prevalence of asthma and atopy in schoolchildren from Porto Alegre, Brazil, has plateaued." *Respiratory Medicine* 109(3): 308-311.
- 
155. Cakir, E., et al. (2010). "The prevalence and risk factors of asthma and allergic diseases among working adolescents." *Asian Pacific Journal of Allergy & Immunology* 28(2-3): 122-129.
- 
156. Zivkovic, Z., et al. (2010). "Prevalence of childhood asthma and allergies in Serbia and Montenegro." *World Journal of Pediatrics* 6(4): 331-336.
- 
157. Hessel, P. A., et al. (2001). "The epidemiology of childhood asthma in Red Deer and Medicine Hat, Alberta." *Canadian Respiratory Journal* 8(3): 139-146.
- 
158. Stout, J. W., et al. (2001). "Differences in asthma prevalence between samples of American Indian and Alaska Native children." *Public Health Reports* 116(1): 51-57.
- 
159. Chhabra, S. K., et al. (1998). "Prevalence of bronchial asthma in schoolchildren in Delhi." *Journal of Asthma* 35(3): 291-296.
-

- 
- 
160. Jain, A., et al. (2010). "Prevalence of bronchial asthma in rural Indian children: a cross sectional study from South India." *Indian Journal of Pediatrics* 77(1): 31-35.
161. Yemaneberhan, H., et al. (1997). "Prevalence of wheeze and asthma and relation to atopy in urban and rural Ethiopia." *Lancet* 350(9071): 85-90.
- 
162. Pite, H., et al. (2014). "Prevalence of asthma and its association with rhinitis in the elderly." *Respiratory Medicine* 108(8): 1117-1126.
- 
163. Ponsonby, A. L., et al. (2008). "A temporal decline in asthma but not eczema prevalence from 2000 to 2005 at school entry in the Australian Capital Territory with further consideration of country of birth." *International Journal of Epidemiology* 37(3): 559-569.
- 
164. Gonzalez-Garcia, M., et al. (2015). "Prevalence, risk factors and underdiagnosis of asthma and wheezing in adults 40 years and older: A population-based study." *Journal of Asthma* 52(8): 823-830.
- 
165. Teeratakulpisarn, J., et al. (2000). "Survey of the prevalence of asthma, allergic rhinitis and eczema in schoolchildren from Khon Kaen, Northeast Thailand. an ISAAC study. International Study of Asthma and Allergies in Childhood." *Asian Pacific Journal of Allergy & Immunology* 18(4): 187-194.
- 
166. Leung, R., et al. (1997). "Prevalence of asthma and allergy in Hong Kong schoolchildren: an ISAAC study." *European Respiratory Journal* 10(2): 354-360.
- 
167. Ding, Y. P., et al. (2012). "An epidemiology study of bronchial asthma in the Li ethnic group in China." *Asian Pacific Journal of Tropical Medicine* 5(2): 157-161.
- 
168. Dennis, R. J., et al. (2012). "Prevalence of asthma and other allergic conditions in Colombia 2009-2010: a cross-sectional study." *BMC Pulmonary Medicine* 12: 17.
- 
169. Zhu, W. J., et al. (2015). "Prevalence and Treatment of Children's Asthma in Rural Areas Compared with Urban Areas in Beijing." *Chinese Medical Journal* 128(17): 2273-2277.
- 
170. Faniran, A. O., et al. (1999). "Prevalence of atopy, asthma symptoms and diagnosis, and the management of asthma: comparison of an affluent and a non-affluent country." *Thorax* 54(7): 606-610.
- 
171. Nordlund, B., et al. (2014). "Prevalence of severe childhood asthma according to the WHO." *Respiratory Medicine* 108(8): 1234-1237.
- 
172. Nelson, K. A., et al. (2009). "Asthma prevalence in low-income urban elementary school students in St. Louis, 1992 and 2004." *Journal of Pediatrics* 154(1): 111-115.
- 
173. Sole, D., et al. (2015). "Prevalence of asthma and allergic diseases in adolescents: nine-year follow-up study (2003-2012)." *Jornal de Pediatria* 91(1): 30-35.
- 
-

- 
174. Zollner, I. K., et al. (2005). "No increase in the prevalence of asthma, allergies, and atopic sensitisation among children in Germany: 1992-2001." *Thorax* 60(7): 545-548.
- 
175. Wanlapakorn, N., et al. (2014). "Prevalence of asthma, level of control and factors associated with asthma control in Thai elementary school students in Bangkok." *Asian Pacific Journal of Allergy & Immunology* 32(4): 287-292.
- 
176. Demir, A. U., et al. (2010). "Asthma and allergic diseases in school children from 1992 to 2007 with incidence data." *Journal of Asthma* 47(10): 1128-1135.
- 
177. Wang, H. Y., et al. (2008). "Prevalence of asthma among Chinese adolescents living in Canada and in China." *CMAJ Canadian Medical Association Journal* 179(11): 1133-1142.
- 
178. Wang, H. Y., et al. (2008). "Prevalence of asthma among Chinese adolescents living in Canada and in China." *CMAJ Canadian Medical Association Journal* 179(11): 1133-1142.
- 
179. Pallasaho, P., et al. (1999). "Increasing prevalence of asthma but not of chronic bronchitis in Finland? Report from the FinEsS-Helsinki Study." *Respiratory Medicine* 93(11): 798-809
- 
180. Tarraf, H., et al. (2018). "Prevalence of asthma among the adult general population of five Middle Eastern countries: results of the SNAPSHOT program." *BMC Pulmonary Medicine* 18(1): 68.
- 
181. Al-Thamiri, D., et al. (2005). "Asthma prevalence and severity among primary-school children in Baghdad." *Eastern Mediterranean Health Journal* 11(1-2): 79-86.
- 
182. Roncada, C., et al. (2016). "Burden of asthma among inner-city children from Southern Brazil." *Journal of Asthma* 53(5): 498-504.
- 
183. Peat, J. K., et al. (1992). "Prevalence of asthma in adults in Busselton, Western Australia." *BMJ* 305(6865): 1326-1329
184. Ekici, A., et al. (2012). "Prevalence of self-reported asthma in urban and rural areas of Turkey." *Journal of Asthma* 49(5): 522-526.
- 
185. Palvo, F., et al. (2008). "Risk factors of childhood asthma in Sao Jose do Rio Preto, Sao Paulo, Brazil." *Journal of Tropical Pediatrics* 54(4): 253-257.
- 
186. Tang, S. P., et al. (2015). "Trends in prevalence and risk factors of childhood asthma in Fuzhou, a city in Southeastern China." *Journal of Asthma* 52(1): 10-15.
- 
187. Musharrafeh, U., et al. (2009). "Prevalence of asthma, allergic rhinitis and eczema among Lebanese adolescents." *Journal of Asthma* 46(4): 382-387.
- 
188. Dales, R. E., et al. (1994). "Prevalence of childhood asthma across Canada." *International Journal of Epidemiology* 23(4): 775-781.
-

- 
- 
189. Bartlett, E., et al. (2013). "Sources and prevalence of self-reported asthma diagnoses in adults in urban and rural settings of Bangladesh." *Global Public Health* 8(1): 79-89.
- 
190. Perez-Perdomo, R., et al. (2003). "Prevalence and correlates of asthma in the Puerto Rican population: Behavioral Risk Factor Surveillance System, 2000." *Journal of Asthma* 40(5): 465-474.
- 
191. Nafti, S., et al. (2009). "Prevalence of asthma in North Africa: the Asthma Insights and Reality in the Maghreb (AIRMAG) study." *Respiratory Medicine* 103 Suppl 2: S2-11.
- 
192. Manfreda, J., et al. (2001). "Prevalence of asthma symptoms among adults aged 20-44 years in Canada." *CMAJ Canadian Medical Association Journal* 164(7): 995-1001.
- 
193. Linehan, M. F., et al. (2009). "Prevalence of respiratory symptoms, features of asthma, and characteristics associated with respiratory disease, in 6-11 year olds in Manchester." *Primary Care Respiratory Journal* 18(1): 21-26.
- 
194. Song, N., et al. (2014). "Prevalence, severity and risk factors of asthma, rhinitis and eczema in a large group of Chinese schoolchildren." *Journal of Asthma* 51(3): 232-242.
- 
195. Sole, D., et al. (2014). "Asthma in children and adolescents in Brazil: contribution of the International Study of Asthma and Allergies in Childhood (ISAAC)." *Revista Paulista de Pediatria* 32(1): 114-125.
- 
196. Ronmark, E., et al. (2001). "Incidence and remission of asthma in schoolchildren: report from the obstructive lung disease in northern Sweden studies." *Pediatrics* 107(3): E37.
- 
197. Brozek, G., et al. (2016). "Childhood asthma prevalence and risk factors in three Eastern European countries--the Belarus, Ukraine, Poland Asthma Study (BUPAS): an international prevalence study." *BMC Pulmonary Medicine* 16: 11.
- 
198. Portnov, B. A., et al. (2012). "High prevalence of childhood asthma in Northern Israel is linked to air pollution by particulate matter: evidence from GIS analysis and Bayesian Model Averaging." *International Journal of Environmental Health Research* 22(3): 249-269.
- 
199. Chrischilles, E., et al. (2004). "Asthma prevalence and morbidity among rural Iowa schoolchildren." *Journal of Allergy & Clinical Immunology* 113(1): 66-71.
- 
200. Anthracopoulos, M., et al. (2001). "Prevalence of asthma among schoolchildren in Patras, Greece: three surveys over 20 years." *Thorax* 56(7): 569-571.
- 
201. de Marco, R., et al. (2012). "Trends in the prevalence of asthma and allergic rhinitis in Italy between 1991 and 2010." *European Respiratory Journal* 39(4): 883-892.
- 
-

---

202. Muc, M., et al. (2014). "Prevalence of asthma and rhinitis symptoms among children living in Coimbra, Portugal." *Revista Portuguesa de Pneumologia* 20(4): 208-210.

---

203. Tai, A., et al. (2009). "Prevalence of asthma symptoms and atopic disorders in preschool children and the trend over a decade." *Journal of Asthma* 46(4): 343-346.

---

204. von Maffei, J., et al. (2001). "Risk factors for asthma prevalence among urban and nonurban African American children." *Journal of Asthma* 38(7): 555-564.

---

205. Tug, T. and Y. Acik (2002). "Prevalence of asthma, asthma-like and allergic symptoms in the urban and rural adult population in Eastern Turkey." *Asian Pacific Journal of Allergy & Immunology* 20(4): 209-215.

---

206. Sy, D. Q., et al. (2007). "Prevalence of asthma and asthma-like symptoms in Dalat Highlands, Vietnam." *Singapore Medical Journal* 48(4): 294-303.

---

- 
207. Erhabor, G. E., et al. (2016). "Asthma in a university campus: a survey of students and staff of Obafemi Awolowo University, Ile-Ife, Nigeria." *Journal of Asthma* 53(1): 30-36.
- 
208. Chang, H. J., et al. (2012). "Prevalence and risk factors of asthma in off-reserve Aboriginal children and adults in Canada." *Canadian Respiratory Journal* 19(6): e68-74.
- 
209. Duhme, H., et al. (1998). "Asthma and allergies among children in West and East Germany: a comparison between Munster and Greifswald using the ISAAC phase I protocol. International Study of Asthma and Allergies in Childhood." *European Respiratory Journal* 11(4): 840-847.
- 
210. Lin, J., et al. (2018). "Prevalence and risk factors of asthma in mainland China: The CARE study." *Respiratory Medicine* 137: 48-54.
- 
211. Lin, R., et al. (2014). "Significant rise of the prevalence and clinical features of childhood asthma in Qingdao China: cluster sampling investigation of 10,082 children." *BMC Public Health* 14: 1002.
- 
212. Saraclar, Y., et al. (1997). "Prevalence of allergic diseases and influencing factors in primary-school children in the Ankara Region of Turkey." *Journal of Asthma* 34(1): 23-30.
- 
213. Erhabor, G. E., et al. (2006). "Prevalence of asthma symptoms among university students 15 to 35 years of age in Obafemi Awolowo University, Ile-Ife, Osun State." *Journal of Asthma* 43(2): 161-164.
- 
214. Sharma, B. S., et al. (2012). "Prevalence of asthma in urban school children in Jaipur, Rajasthan." *Indian Pediatrics* 49(10): 835-836.
- 
215. Sole, D., et al. (1999). "Prevalence of asthma and related symptoms in school-age children in Sao Paulo, Brazil--International Study of Asthma and Allergies in Children (ISAAC)." *Journal of Asthma* 36(2): 205-212.
- 
216. Kraai, S., et al. (2013). "High prevalence of asthma symptoms in Warao Amerindian children in Venezuela is significantly associated with open-fire cooking: a cross-sectional observational study." *Respiratory Research* 14: 76.
- 
217. Ormerod, L. P., et al. (1999). "Prevalence of asthma and 'probable' asthma in the Asian population in Blackburn, U.K." *Respiratory Medicine* 93(1): 16-20.
- 
218. Solet, J. L., et al. (2019). "A cross sectional survey to estimate prevalence and associated factors of asthma on Reunion Island, Indian Ocean." *BMC Public Health* 19(1): 663.
- 
219. Timonen, K. L., et al. (1995). "Prevalence and characteristics of children with chronic respiratory symptoms in eastern Finland." *European Respiratory Journal* 8(7): 1155-1160.
- 
220. Saraclar, Y., et al. (1998). "Prevalence of asthma symptoms in school children in Ankara, Turkey." *Respiratory Medicine* 92(2): 203-207.
-



## Appendix 5. Estimation of the regional and national numbers of people with asthma in 2019

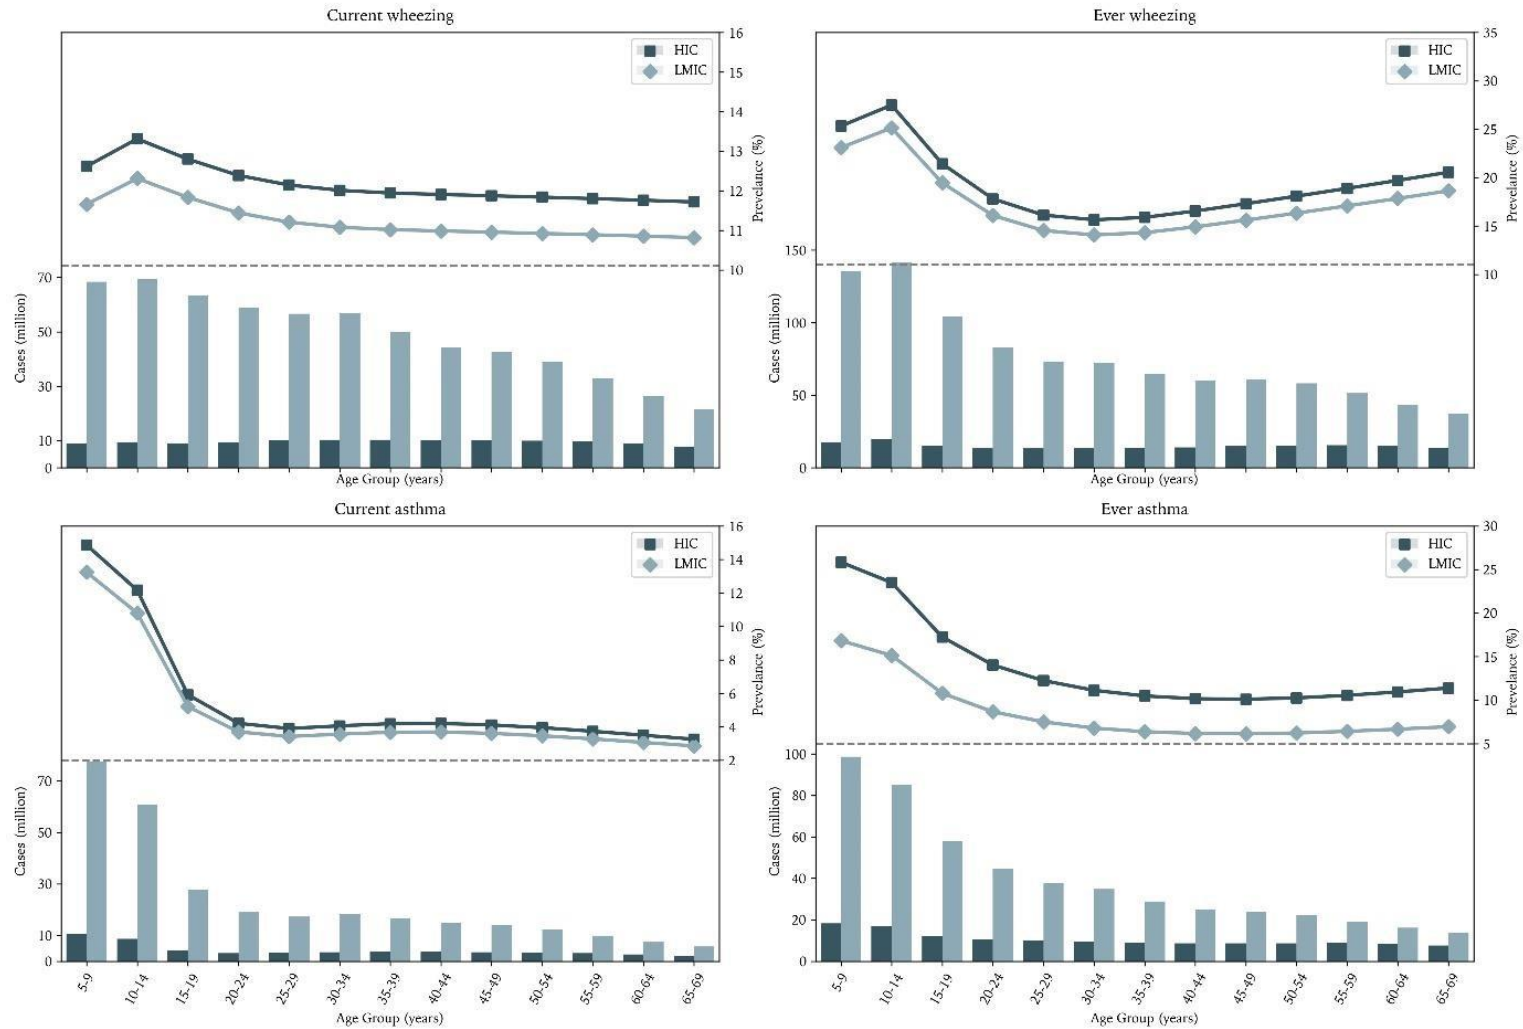

Figure S3. The age-specific prevalence (points) and number of cases (bar) of asthma in 2019, by income

**Table S7. The estimated numbers of people with current wheezing, ever wheezing, current asthma and ever asthma in HICs, LMICs and worldwide in 2019, by age group and sex**

| Age group                                 | Male        |               |               | Female      |               |               | Overall      |               |               |
|-------------------------------------------|-------------|---------------|---------------|-------------|---------------|---------------|--------------|---------------|---------------|
|                                           | HIC         | LMIC          | Worldwide     | HIC         | LMIC          | Worldwide     | HIC          | LMIC          | Worldwide     |
| <b>Current wheezing (million, 95% CI)</b> |             |               |               |             |               |               |              |               |               |
| 5-9                                       | 4.76        | 36.90         | 41.67         | 4.15        | 31.54         | 35.69         | 8.91         | 68.44         | 77.36         |
| years                                     | (3.88-5.82) | (29.56-45.77) | (33.44-51.58) | (3.37-5.08) | (25.20-39.23) | (28.57-44.31) | (7.25-10.89) | (54.76-85.00) | (62.01-95.89) |
| 10-14                                     | 5.10        | 37.42         | 42.52         | 4.44        | 31.89         | 36.33         | 9.54         | 69.31         | 78.85         |
| years                                     | (4.16-6.22) | (30.00-46.36) | (34.15-52.58) | (3.61-5.43) | (25.50-39.62) | (29.11-45.05) | (7.77-11.65) | (55.50-85.98) | (63.26-97.63) |
| 15-19                                     | 4.84        | 34.23         | 39.06         | 4.21        | 29.11         | 33.32         | 9.05         | 63.33         | 72.38         |
| years                                     | (3.94-5.90) | (27.41-42.45) | (31.34-48.36) | (3.42-5.16) | (23.25-36.21) | (26.67-41.37) | (7.36-11.06) | (50.66-78.66) | (58.02-89.72) |
| 20-24                                     | 5.04        | 31.79         | 36.83         | 4.33        | 27.21         | 31.54         | 9.37         | 59.00         | 68.37         |
| years                                     | (4.07-6.19) | (25.30-39.68) | (29.37-45.86) | (3.50-5.34) | (21.60-34.06) | (25.10-39.40) | (7.57-11.53) | (46.90-73.73) | (54.47-85.26) |
| 25-29                                     | 5.51        | 30.36         | 35.87         | 4.62        | 26.26         | 30.88         | 10.12        | 56.62         | 66.75         |
| years                                     | (4.43-6.80) | (24.04-38.07) | (28.47-44.87) | (3.71-5.72) | (20.75-33.03) | (24.45-38.74) | (8.14-12.51) | (44.79-71.10) | (52.93-83.61) |
| 30-34                                     | 5.61        | 30.24         | 35.85         | 4.71        | 26.63         | 31.35         | 10.32        | 56.88         | 67.20         |
| years                                     | (4.50-6.93) | (23.90-38.00) | (28.41-44.93) | (3.78-5.85) | (21.00-33.56) | (24.78-39.40) | (8.28-12.78) | (44.90-71.55) | (53.18-84.33) |
| 35-39                                     | 5.56        | 26.37         | 31.93         | 4.79        | 23.50         | 28.29         | 10.35        | 49.86         | 60.21         |
| years                                     | (4.47-6.88) | (20.84-33.13) | (25.31-40.00) | (3.84-5.94) | (18.53-29.61) | (22.37-35.55) | (8.30-12.82) | (39.37-62.73) | (47.67-75.55) |
| 40-44                                     | 5.45        | 23.30         | 28.76         | 4.75        | 20.97         | 25.72         | 10.20        | 44.27         | 54.47         |
| years                                     | (4.38-6.74) | (18.42-29.27) | (22.80-36.01) | (3.81-5.89) | (16.54-26.42) | (20.34-32.31) | (8.19-12.63) | (34.96-55.69) | (43.15-68.32) |
| 45-49                                     | 5.44        | 22.32         | 27.76         | 4.79        | 20.22         | 25.01         | 10.23        | 42.54         | 52.76         |
| years                                     | (4.37-6.73) | (17.64-28.05) | (22.00-34.78) | (3.84-5.94) | (15.94-25.48) | (19.77-31.42) | (8.20-12.67) | (33.57-53.53) | (41.78-66.20) |
| 50-54                                     | 5.27        | 20.29         | 25.57         | 4.72        | 18.67         | 23.39         | 10.00        | 38.96         | 48.96         |
| years                                     | (4.23-6.53) | (16.01-25.54) | (20.24-32.07) | (3.78-5.87) | (14.70-23.56) | (18.47-29.43) | (8.01-12.40) | (30.71-49.10) | (38.72-61.50) |
| 55-59                                     | 5.11        | 16.96         | 22.06         | 4.68        | 15.82         | 20.50         | 9.78         | 32.77         | 42.56         |

|       |             |               |               |             |               |               |              |               |               |
|-------|-------------|---------------|---------------|-------------|---------------|---------------|--------------|---------------|---------------|
| years | (4.09-6.34) | (13.35-21.38) | (17.44-27.72) | (3.73-5.82) | (12.42-20.01) | (16.16-25.83) | (7.82-12.16) | (25.77-41.39) | (33.59-53.55) |
| 60-64 | 4.57        | 13.45         | 18.03         | 4.35        | 12.92         | 17.27         | 8.93         | 26.37         | 35.30         |
| years | (3.65-5.69) | (10.56-17.01) | (14.21-22.71) | (3.46-5.43) | (10.11-16.39) | (13.58-21.82) | (7.11-11.13) | (20.67-33.40) | (27.79-44.53) |
|       | 3.92        | 10.84         | 14.76         | 3.92        | 10.79         | 14.71         | 7.84         | 21.63         | 29.47         |

| Age group    | Male          |                 |                 | Female        |                 |                 | Overall         |                 |                 |
|--------------|---------------|-----------------|-----------------|---------------|-----------------|-----------------|-----------------|-----------------|-----------------|
|              | HIC           | LMIC            | Worldwide       | HIC           | LMIC            | Worldwide       | HIC             | LMIC            | Worldwide       |
| 65-69        |               |                 |                 |               |                 |                 |                 |                 |                 |
| years        | (3.11-4.90)   | (8.48-13.76)    | (11.59-18.66)   | (3.11-4.92)   | (8.41-13.73)    | (11.52-18.65)   | (6.22-9.81)     | (16.89-27.49)   | (23.12-37.31)   |
| Overall      | 66.17         | 334.48          | 400.65          | 58.47         | 295.52          | 353.99          | 124.64          | 630.00          | 754.64          |
| (5-69 years) | (53.27-81.66) | (265.50-418.47) | (318.77-500.13) | (46.94-72.38) | (233.95-370.90) | (280.90-443.28) | (100.21-154.04) | (499.46-789.37) | (599.67-943.41) |

**Ever wheezing (million, 95% CI)**

|       |              |               |                |              |               |               |               |                 |                 |
|-------|--------------|---------------|----------------|--------------|---------------|---------------|---------------|-----------------|-----------------|
| 5-9   | 9.59         | 73.35         | 82.94          | 8.31         | 62.26         | 70.57         | 17.90         | 135.61          | 153.51          |
| years | (7.76-11.67) | (59.57-89.14) | (67.33-100.82) | (6.68-10.18) | (50.29-76.15) | (56.97-86.34) | (14.44-21.85) | (109.86-165.30) | (124.30-187.15) |
| 10-14 | 10.55        | 76.59         | 87.14          | 9.16         | 64.94         | 74.10         | 19.71         | 141.53          | 161.25          |
| years | (8.59-12.76) | (62.52-92.55) | (71.11-105.31) | (7.41-11.15) | (52.70-79.01) | (60.11-90.16) | (16.00-23.92) | (115.22-171.56) | (131.22-195.47) |
| 15-19 | 8.14         | 56.59         | 64.73          | 7.02         | 47.57         | 54.58         | 15.15         | 104.16          | 119.31          |
| years | (6.51-10.03) | (45.49-69.59) | (52.00-79.62)  | (5.58-8.71)  | (38.05-58.82) | (43.64-67.53) | (12.09-18.74) | (83.54-128.41)  | (95.64-147.15)  |
| 20-24 | 7.29         | 45.03         | 52.32          | 6.18         | 37.94         | 44.13         | 13.47         | 82.97           | 96.44           |
| years | (5.75-9.13)  | (35.72-56.17) | (41.47-65.30)  | (4.85-7.78)  | (29.98-47.57) | (34.83-55.36) | (10.60-16.91) | (65.70-103.74)  | (76.30-120.65)  |
| 25-29 | 7.37         | 39.68         | 47.05          | 6.08         | 33.73         | 39.81         | 13.44         | 73.42           | 86.86           |
| years | (5.76-9.31)  | (31.23-49.93) | (36.99-59.24)  | (4.73-7.72)  | (26.44-42.64) | (31.17-50.36) | (10.49-17.03) | (57.67-92.57)   | (68.16-109.60)  |
| 30-34 | 7.35         | 38.74         | 46.10          | 6.08         | 33.52         | 39.60         | 13.44         | 72.26           | 85.70           |
| years | (5.73-9.32)  | (30.40-48.90) | (36.13-58.22)  | (4.72-7.75)  | (26.20-42.50) | (30.92-50.25) | (10.45-17.07) | (56.60-91.39)   | (67.05-108.47)  |
| 35-39 | 7.45         | 34.52         | 41.98          | 6.32         | 30.24         | 36.55         | 13.77         | 64.76           | 78.53           |
| years | (5.82-9.44)  | (27.10-43.54) | (32.92-52.98)  | (4.91-8.04)  | (23.65-38.31) | (28.55-46.35) | (10.72-17.48) | (50.75-81.85)   | (61.47-99.33)   |
| 40-44 | 7.63         | 31.89         | 39.52          | 6.55         | 28.22         | 34.76         | 14.18         | 60.10           | 74.28           |
| years | (5.97-9.64)  | (25.08-40.12) | (31.05-49.76)  | (5.10-8.31)  | (22.11-35.68) | (27.21-43.99) | (11.06-17.95) | (47.20-75.79)   | (58.26-93.75)   |

|             |                      |                        |                        |                     |                        |                        |                        |                        |                        |
|-------------|----------------------|------------------------|------------------------|---------------------|------------------------|------------------------|------------------------|------------------------|------------------------|
| 45-49 years | 7.98<br>(6.25-10.05) | 32.04<br>(25.25-40.23) | 40.02<br>(31.50-50.28) | 6.93<br>(5.40-8.78) | 28.57<br>(22.42-36.06) | 35.50<br>(27.82-44.84) | 14.90<br>(11.65-18.83) | 60.62<br>(47.67-76.29) | 75.52<br>(59.32-95.12) |
| 50-54 years | 8.11<br>(6.36-10.20) | 30.56<br>(24.10-38.32) | 38.66<br>(30.46-48.52) | 7.16<br>(5.59-9.07) | 27.70<br>(21.75-34.92) | 34.86<br>(27.34-43.98) | 15.27<br>(11.95-19.27) | 58.26<br>(45.85-73.23) | 73.53<br>(57.80-92.50) |
| 55-59 years | 8.22<br>(6.45-10.33) | 26.77<br>(21.11-33.54) | 34.99<br>(27.56-43.87) | 7.44<br>(5.81-9.41) | 24.63<br>(19.33-31.03) | 32.07<br>(25.14-40.44) | 15.66<br>(12.26-19.73) | 51.40<br>(40.45-64.57) | 67.05<br>(52.71-84.31) |
| 60-64 years | 7.71<br>(6.05-9.68)  | 22.25<br>(17.54-27.88) | 29.96<br>(23.59-37.56) | 7.25<br>(5.66-9.17) | 21.10<br>(16.55-26.59) | 28.35<br>(22.21-35.76) | 14.96<br>(11.71-18.85) | 43.35<br>(34.09-54.47) | 58.31<br>(45.80-73.32) |

| Age group            | Male                     |                           |                           | Female                  |                           |                           | Overall                   |                             |                               |
|----------------------|--------------------------|---------------------------|---------------------------|-------------------------|---------------------------|---------------------------|---------------------------|-----------------------------|-------------------------------|
|                      | HIC                      | LMIC                      | Worldwide                 | HIC                     | LMIC                      | Worldwide                 | HIC                       | LMIC                        | Worldwide                     |
| 65-69 years          | 6.91<br>(5.42-8.68)      | 18.79<br>(14.79-23.55)    | 25.70<br>(20.21-32.23)    | 6.85<br>(5.34-8.66)     | 18.47<br>(14.47-23.30)    | 25.32<br>(19.80-31.95)    | 13.76<br>(10.76-17.33)    | 37.26<br>(29.25-46.85)      | 51.02<br>(40.01-64.19)        |
| Overall (5-69 years) | 104.30<br>(82.42-130.25) | 526.80<br>(419.89-653.46) | 631.10<br>(502.31-783.71) | 91.30<br>(71.78-114.72) | 458.89<br>(363.94-572.58) | 550.20<br>(435.72-687.30) | 195.60<br>(154.20-244.97) | 985.70<br>(783.83-1,226.04) | 1,181.30<br>(938.03-1,471.01) |

**Current asthma (million, 95% CI)**

|             |                     |                        |                        |                     |                        |                        |                       |                         |                         |
|-------------|---------------------|------------------------|------------------------|---------------------|------------------------|------------------------|-----------------------|-------------------------|-------------------------|
| 5-9 years   | 5.51<br>(4.10-7.30) | 41.18<br>(24.26-67.07) | 46.70<br>(28.36-74.37) | 4.98<br>(3.70-6.61) | 36.51<br>(21.44-59.76) | 41.49<br>(25.14-66.38) | 10.50<br>(7.80-13.92) | 77.69<br>(45.70-126.83) | 88.19<br>(53.50-140.75) |
| 10-14 years | 4.59<br>(3.40-6.12) | 32.30<br>(18.81-53.55) | 36.88<br>(22.21-59.66) | 4.13<br>(3.05-5.52) | 28.49<br>(16.55-47.43) | 32.62<br>(19.61-52.95) | 8.72<br>(6.45-11.64)  | 60.79<br>(35.37-100.97) | 69.50<br>(41.82-112.61) |
| 15-19 years | 2.20<br>(1.61-3.00) | 14.86<br>(8.49-25.56)  | 17.06<br>(10.09-28.56) | 1.98<br>(1.44-2.70) | 13.04<br>(7.44-22.48)  | 15.02<br>(8.88-25.18)  | 4.18<br>(3.05-5.71)   | 27.90<br>(15.93-48.03)  | 32.08<br>(18.98-53.74)  |
| 20-24 years | 1.69<br>(1.21-2.35) | 10.13<br>(5.72-17.72)  | 11.82<br>(6.92-20.07)  | 1.50<br>(1.07-2.08) | 8.94<br>(5.04-15.67)   | 10.44<br>(6.11-17.75)  | 3.18<br>(2.28-4.43)   | 19.07<br>(10.76-33.39)  | 22.26<br>(13.03-37.82)  |
| 25-29 years | 1.74<br>(1.24-2.44) | 9.14<br>(5.14-16.07)   | 10.89<br>(6.37-18.52)  | 1.51<br>(1.07-2.11) | 8.16<br>(4.58-14.36)   | 9.66<br>(5.65-16.47)   | 3.25<br>(2.31-4.56)   | 17.30<br>(9.72-30.43)   | 20.55<br>(12.02-34.99)  |
| 30-34 years | 1.87<br>(1.32-2.62) | 9.59<br>(5.38-16.85)   | 11.45<br>(6.71-19.47)  | 1.62<br>(1.15-2.27) | 8.71<br>(4.89-15.33)   | 10.33<br>(6.03-17.61)  | 3.49<br>(2.47-4.89)   | 18.29<br>(10.27-32.18)  | 21.78<br>(12.74-37.08)  |

|             |                     |                      |                       |                     |                      |                      |                     |                       |                        |
|-------------|---------------------|----------------------|-----------------------|---------------------|----------------------|----------------------|---------------------|-----------------------|------------------------|
| 35-39 years | 1.92<br>(1.36-2.70) | 8.67<br>(4.87-15.25) | 10.60<br>(6.23-17.95) | 1.71<br>(1.21-2.40) | 7.98<br>(4.47-14.05) | 9.68<br>(5.68-16.45) | 3.63<br>(2.57-5.10) | 16.65<br>(9.34-29.30) | 20.28<br>(11.91-34.40) |
| 40-44 years | 1.90<br>(1.34-2.67) | 7.71<br>(4.32-13.57) | 9.61<br>(5.67-16.24)  | 1.70<br>(1.20-2.40) | 7.16<br>(4.01-12.62) | 8.86<br>(5.22-15.02) | 3.60<br>(2.55-5.06) | 14.87<br>(8.34-26.19) | 18.47<br>(10.88-31.25) |
| 45-49 years | 1.86<br>(1.31-2.61) | 7.25<br>(4.06-12.77) | 9.11<br>(5.37-15.38)  | 1.69<br>(1.19-2.37) | 6.78<br>(3.79-11.95) | 8.46<br>(4.98-14.33) | 3.54<br>(2.50-4.99) | 14.02<br>(7.86-24.72) | 17.57<br>(10.36-29.71) |
| 50-54 years | 1.73<br>(1.23-2.44) | 6.34<br>(3.55-11.18) | 8.08<br>(4.78-13.62)  | 1.60<br>(1.13-2.25) | 6.02<br>(3.37-10.63) | 7.62<br>(4.50-12.89) | 3.33<br>(2.36-4.69) | 12.37<br>(6.92-21.82) | 15.70<br>(9.28-26.51)  |
| 55-59 years | 1.59<br>(1.13-2.24) | 5.03<br>(2.82-8.87)  | 6.62<br>(3.94-11.12)  | 1.50<br>(1.06-2.12) | 4.84<br>(2.71-8.55)  | 6.34<br>(3.77-10.67) | 3.10<br>(2.19-4.36) | 9.87<br>(5.52-17.43)  | 12.96<br>(7.71-21.79)  |
|             | 1.34                | 3.75                 | 5.09                  | 1.31                | 3.71                 | 5.03                 | 2.65                | 7.46                  | 10.11                  |

| Age group            | Male                   |                          |                           | Female                 |                          |                           | Overall                |                           |                           |
|----------------------|------------------------|--------------------------|---------------------------|------------------------|--------------------------|---------------------------|------------------------|---------------------------|---------------------------|
|                      | HIC                    | LMIC                     | Worldwide                 | HIC                    | LMIC                     | Worldwide                 | HIC                    | LMIC                      | Worldwide                 |
| 60-64 years          | (0.95-1.89)            | (2.10-6.62)              | (3.04-8.51)               | (0.93-1.85)            | (2.08-6.57)              | (3.00-8.42)               | (1.88-3.74)            | (4.17-13.19)              | (6.05-16.93)              |
| 65-69 years          | 1.07<br>(0.76-1.51)    | 2.82<br>(1.58-5.00)      | 3.90<br>(2.34-6.51)       | 1.11<br>(0.78-1.56)    | 2.90<br>(1.62-5.13)      | 4.00<br>(2.40-6.69)       | 2.18<br>(1.54-3.08)    | 5.72<br>(3.20-10.13)      | 7.90<br>(4.74-13.20)      |
| Overall (5-69 years) | 29.02<br>(20.95-39.90) | 158.77<br>(91.10-270.08) | 187.79<br>(112.05-309.97) | 26.34<br>(18.99-36.27) | 143.23<br>(81.99-244.53) | 169.56<br>(100.98-280.80) | 55.35<br>(39.93-76.16) | 302.00<br>(173.09-514.61) | 357.35<br>(213.03-590.77) |

**Ever asthma (million, 95% CI)**

|             |                      |                        |                        |                      |                        |                        |                        |                         |                          |
|-------------|----------------------|------------------------|------------------------|----------------------|------------------------|------------------------|------------------------|-------------------------|--------------------------|
| 5-9 years   | 8.94<br>(7.34-10.76) | 48.52<br>(38.95-59.90) | 57.45<br>(46.29-70.66) | 9.31<br>(7.68-11.13) | 50.19<br>(40.45-61.68) | 59.50<br>(48.14-72.81) | 18.25<br>(15.02-21.89) | 98.71<br>(79.40-121.58) | 116.95<br>(94.43-143.47) |
| 10-14 years | 8.24<br>(6.73-9.98)  | 41.89<br>(33.50-51.95) | 50.13<br>(40.23-61.94) | 8.60<br>(7.06-10.35) | 43.27<br>(34.73-53.43) | 51.86<br>(41.79-63.78) | 16.84<br>(13.79-20.33) | 85.16<br>(68.23-105.38) | 102.00<br>(82.02-125.71) |
| 15-19 years | 5.94<br>(4.78-7.31)  | 28.34<br>(22.45-35.57) | 34.28<br>(27.23-42.88) | 6.25<br>(5.05-7.66)  | 29.38<br>(23.33-36.75) | 35.63<br>(28.39-44.41) | 12.19<br>(9.83-14.97)  | 57.72<br>(45.78-72.32)  | 69.91<br>(55.62-87.28)   |
| 20-24 years | 5.19<br>(4.15-6.45)  | 21.8<br>(17.19-27.52)  | 26.99<br>(21.34-33.97) | 5.42<br>(4.35-6.70)  | 22.82<br>(18.03-28.72) | 28.24<br>(22.37-35.42) | 10.61<br>(8.50-13.15)  | 44.62<br>(35.22-56.24)  | 55.23<br>(43.71-69.39)   |

|             |                     |                        |                        |                     |                        |                        |                       |                        |                        |
|-------------|---------------------|------------------------|------------------------|---------------------|------------------------|------------------------|-----------------------|------------------------|------------------------|
| 25-29 years | 5.05<br>(4.02-6.30) | 18.39<br>(14.46-23.28) | 23.43<br>(18.48-29.58) | 5.15<br>(4.11-6.40) | 19.48<br>(15.34-24.60) | 24.62<br>(19.46-31.00) | 10.19<br>(8.13-12.70) | 37.86<br>(29.80-47.88) | 48.06<br>(37.93-60.58) |
| 30-34 years | 4.72<br>(3.75-5.90) | 16.74<br>(13.14-21.24) | 21.46<br>(16.89-27.14) | 4.83<br>(3.85-6.03) | 18.07<br>(14.21-22.87) | 22.90<br>(18.06-28.90) | 9.55<br>(7.60-11.93)  | 34.81<br>(27.35-44.11) | 44.36<br>(34.95-56.04) |
| 35-39 years | 4.42<br>(3.51-5.55) | 13.76<br>(10.79-17.47) | 18.18<br>(14.30-23.02) | 4.65<br>(3.69-5.81) | 15.04<br>(11.82-19.06) | 19.68<br>(15.51-24.87) | 9.07<br>(7.20-11.35)  | 28.80<br>(22.61-36.54) | 37.87<br>(29.81-47.89) |
| 40-44 years | 4.22<br>(3.34-5.29) | 11.81<br>(9.26-15.01)  | 16.03<br>(12.60-20.30) | 4.48<br>(3.56-5.61) | 13.04<br>(10.24-16.53) | 17.52<br>(13.80-22.14) | 8.70<br>(6.90-10.90)  | 24.84<br>(19.50-31.54) | 33.54<br>(26.40-42.44) |
| 45-49 years | 4.19<br>(3.32-5.26) | 11.27<br>(8.84-14.33)  | 15.47<br>(12.16-19.59) | 4.51<br>(3.58-5.64) | 12.53<br>(9.84-15.89)  | 17.03<br>(13.42-21.53) | 8.70<br>(6.90-10.90)  | 23.80<br>(18.67-30.21) | 32.50<br>(25.58-41.11) |
| 50-54 years | 4.14<br>(3.28-5.19) | 10.42<br>(8.17-13.25)  | 14.56<br>(11.45-18.43) | 4.52<br>(3.59-5.65) | 11.77<br>(9.24-14.92)  | 16.28<br>(12.83-20.57) | 8.65<br>(6.87-10.84)  | 22.19<br>(17.42-28.16) | 30.84<br>(24.28-39.00) |
| 55-59 years | 4.13<br>(3.27-5.17) | 8.99<br>(7.05-11.42)   | 13.12<br>(10.33-16.59) | 4.61<br>(3.67-5.76) | 10.29<br>(8.08-13.04)  | 14.90<br>(11.75-18.80) | 8.74<br>(6.94-10.93)  | 19.28<br>(15.14-24.45) | 28.01<br>(22.07-35.38) |

| Age group            | Male                   |                           |                           | Female                 |                           |                           | Overall                   |                           |                           |
|----------------------|------------------------|---------------------------|---------------------------|------------------------|---------------------------|---------------------------|---------------------------|---------------------------|---------------------------|
|                      | HIC                    | LMIC                      | Worldwide                 | HIC                    | LMIC                      | Worldwide                 | HIC                       | LMIC                      | Worldwide                 |
| 60-64 years          | 3.84<br>(3.05-4.81)    | 7.42<br>(5.83-9.42)       | 11.27<br>(8.88-14.23)     | 4.45<br>(3.55-5.56)    | 8.74<br>(6.87-11.07)      | 13.20<br>(10.42-16.63)    | 8.30<br>(6.60-10.37)      | 16.17<br>(12.70-20.50)    | 24.46<br>(19.3-30.87)     |
| 65-69 years          | 3.43<br>(2.73-4.29)    | 6.25<br>(4.91-7.92)       | 9.68<br>(7.63-12.22)      | 4.18<br>(3.33-5.21)    | 7.62<br>(5.99-9.64)       | 11.80<br>(9.33-14.85)     | 7.61<br>(6.06-9.50)       | 13.87<br>(10.90-17.57)    | 21.48<br>(16.96-27.07)    |
| Overall (5-69 years) | 66.45<br>(53.27-82.26) | 245.61<br>(194.54-308.28) | 312.05<br>(247.81-390.53) | 70.95<br>(57.07-87.50) | 262.21<br>(208.18-328.20) | 333.17<br>(265.25-415.70) | 137.40<br>(110.34-169.75) | 507.82<br>(402.72-636.47) | 645.22<br>(513.06-806.23) |

**Table S8. Estimated numbers of people with current wheezing or ever asthma in World Bank income and World Health Organization combined regions in 2019, by age group**

| Age group                                 | AFR                   | AMR                  | SEAR                   | EUR                  | EMR                 | WPR                    |
|-------------------------------------------|-----------------------|----------------------|------------------------|----------------------|---------------------|------------------------|
| <b>Current wheezing (million, 95% CI)</b> |                       |                      |                        |                      |                     |                        |
| 5-9 years                                 | 20.38 (16.31-25.32)   | 7.57 (6.10-9.34)     | 20.05 (16.04-24.90)    | 6.85 (5.53-8.43)     | 8.76 (7.01-10.86)   | 14.67 (11.76-18.19)    |
| 10-14 years                               | 19.00 (15.21-23.57)   | 8.13 (6.55-10.02)    | 22.16 (17.74-27.49)    | 7.02 (5.67-8.63)     | 8.27 (6.63-10.25)   | 15.03 (12.06-18.61)    |
| 15-19 years                               | 15.72 (12.58-19.53)   | 7.94 (6.40-9.80)     | 21.48 (17.18-26.68)    | 6.34 (5.12-7.80)     | 7.23 (5.79-8.97)    | 14.12 (11.32-17.51)    |
| 20-24 years                               | 13.03 (10.35-16.28)   | 7.88 (6.31-9.79)     | 20.24 (16.09-25.30)    | 6.30 (5.06-7.80)     | 6.66 (5.30-8.32)    | 14.42 (11.49-17.99)    |
| 25-29 years                               | 10.97 (8.68-13.78)    | 7.87 (6.27-9.81)     | 18.87 (14.92-23.69)    | 6.92 (5.53-8.62)     | 6.47 (5.13-8.11)    | 15.57 (12.34-19.52)    |
| 30-34 years                               | 9.35 (7.38-11.76)     | 7.47 (5.94-9.33)     | 17.71 (13.98-22.28)    | 7.64 (6.08-9.53)     | 6.16 (4.88-7.74)    | 18.66 (14.75-23.43)    |
| 35-39 years                               | 7.87 (6.21-9.90)      | 7.05 (5.60-8.81)     | 16.64 (13.14-20.94)    | 7.57 (6.03-9.44)     | 5.41 (4.28-6.79)    | 15.38 (12.17-19.31)    |
| 40-44 years                               | 6.38 (5.04-8.03)      | 6.49 (5.16-8.10)     | 14.80 (11.69-18.62)    | 7.36 (5.87-9.17)     | 4.51 (3.57-5.66)    | 14.64 (11.58-18.37)    |
| 45-49 years                               | 5.12 (4.04-6.44)      | 6.03 (4.80-7.54)     | 13.24 (10.45-16.66)    | 7.23 (5.76-9.00)     | 3.67 (2.90-4.61)    | 17.22 (13.62-21.62)    |
| 50-54 years                               | 4.05 (3.19-5.10)      | 5.74 (4.56-7.18)     | 11.61 (9.15-14.63)     | 7.07 (5.64-8.82)     | 3.04 (2.40-3.83)    | 17.18 (13.57-21.61)    |
| 55-59 years                               | 3.22 (2.53-4.06)      | 5.50 (4.36-6.89)     | 9.84 (7.74-12.42)      | 7.09 (5.63-8.86)     | 2.46 (1.94-3.10)    | 14.12 (11.13-17.79)    |
| 60-64 years                               | 2.48 (1.94-3.14)      | 4.84 (3.83-6.08)     | 7.97 (6.25-10.10)      | 6.42 (5.09-8.05)     | 1.91 (1.50-2.41)    | 11.35 (8.92-14.34)     |
| 65-69 years                               | 1.82 (1.42-2.31)      | 4.01 (3.16-5.05)     | 5.96 (4.66-7.58)       | 5.55 (4.38-6.99)     | 1.36 (1.06-1.73)    | 10.52 (8.24-13.34)     |
| Overall (569 years)                       | 119.39 (94.88-149.24) | 86.53 (69.05-107.74) | 200.57 (159.02-251.29) | 89.36 (71.39-111.14) | 65.91 (52.39-82.37) | 192.88 (152.94-241.64) |
| <b>Ever asthma (million, 95% CI)</b>      |                       |                      |                        |                      |                     |                        |
| 5-9 years                                 | 27.91 (22.45-34.38)   | 14.63 (11.90-17.79)  | 27.76 (22.33-34.20)    | 11.63 (9.48-14.11)   | 13.03 (10.5-16.02)  | 22.48 (18.15-27.58)    |
| 10-14 years                               | 22.17 (17.77-27.44)   | 13.48 (10.92-16.49)  | 26.14 (20.94-32.35)    | 10.27 (8.33-12.51)   | 10.50 (8.42-12.97)  | 19.69 (15.83-24.28)    |
| 15-19 years                               | 13.62 (10.80-17.06)   | 9.90 (7.91-12.28)    | 18.79 (14.90-23.54)    | 7.02 (5.63-8.69)     | 6.81 (5.41-8.52)    | 13.86 (11.03-17.31)    |
| 20-24 years                               | 9.36 (7.39-11.80)     | 8.23 (6.54-10.28)    | 14.69 (11.60-18.52)    | 5.86 (4.67-7.30)     | 5.22 (4.12-6.56)    | 11.85 (9.38-14.89)     |
| 25-29 years                               | 6.97 (5.49-8.82)      | 7.34 (5.81-9.20)     | 12.11 (9.53-15.31)     | 5.7 (4.52-7.14)      | 4.48 (3.53-5.66)    | 11.31 (8.92-14.26)     |
| 30-34 years                               | 5.43 (4.27-6.88)      | 6.39 (5.05-8.03)     | 10.40 (8.17-13.18)     | 5.74 (4.55-7.21)     | 3.91 (3.08-4.95)    | 12.27 (9.66-15.51)     |
| 35-39 years                               | 4.32 (3.39-5.48)      | 5.69 (4.50-7.17)     | 9.23 (7.24-11.71)      | 5.41 (4.28-6.81)     | 3.25 (2.55-4.11)    | 9.80 (7.71-12.40)      |

|             |                  |                  |                   |                  |                  |                    |
|-------------|------------------|------------------|-------------------|------------------|------------------|--------------------|
| 40-44 years | 3.40 (2.67-4.32) | 5.11 (4.04-6.44) | 7.97 (6.26-10.12) | 5.15 (4.07-6.48) | 2.63 (2.07-3.33) | 9.15 (7.20-11.58)  |
| 45-49 years | 2.72 (2.13-3.45) | 4.76 (3.76-6.00) | 7.11 (5.58-9.03)  | 5.07 (4.01-6.37) | 2.13 (1.67-2.7)  | 10.65 (8.38-13.48) |
| 50-54 years | 2.19 (1.72-2.78) | 4.65 (3.67-5.85) | 6.34 (4.98-8.05)  | 5.08 (4.02-6.39) | 1.79 (1.41-2.27) | 10.74 (8.45-13.60) |

| Age group           | AFR                   | AMR                 | SEAR                   | EUR                  | EMR                 | WPR                   |
|---------------------|-----------------------|---------------------|------------------------|----------------------|---------------------|-----------------------|
| 55-59 years         | 1.8 (1.41-2.28)       | 4.65 (3.68-5.85)    | 5.55 (4.36-7.04)       | 5.23 (4.14-6.57)     | 1.5 (1.18-1.89)     | 9.24 (7.28-11.69)     |
| 60-64 years         | 1.44 (1.13-1.83)      | 4.31 (3.41-5.41)    | 4.69 (3.68-5.94)       | 4.94 (3.91-6.20)     | 1.2 (0.95-1.53)     | 7.87 (6.2-9.94)       |
| 65-69 years         | 1.11 (0.87-1.40)      | 3.74 (2.97-4.69)    | 3.66 (2.88-4.64)       | 4.47 (3.55-5.61)     | 0.9 (0.71-1.14)     | 7.64 (6.02-9.64)      |
| Overall (569 years) | 102.44 (81.49-127.91) | 92.88 (74.16-115.5) | 154.45 (122.45-193.64) | 81.57 (65.16-101.39) | 57.34 (45.59-71.65) | 156.55 (124.2-196.14) |



**Table S9. Estimated prevalence and number of people aged 0-79 years living with current wheezing or ever asthma in 201 countries and territories in 2019**

| Country                      | Current wheezing                   |                     | Ever asthma                        |                     |
|------------------------------|------------------------------------|---------------------|------------------------------------|---------------------|
|                              | Number of cases (thousand, 95% CI) | Prevalence (%)      | Number of cases (thousand, 95% CI) | Prevalence (%)      |
| Antigua and Barbuda          | 9.13 (7.34-11.27)                  | 10.85 (8.73-13.40)  | 3.14 (2.53-3.87)                   | 3.74 (3.01-4.61)    |
| Aruba                        | 9.81 (7.89-12.13)                  | 10.82 (8.70-13.37)  | 12.66 (10.17-15.63)                | 13.95 (11.21-17.23) |
| Bahamas                      | 32.21 (25.94-39.75)                | 9.36 (7.53-11.55)   | 52.36 (42.14-64.53)                | 15.21 (12.24-18.75) |
| Barbados                     | 20.75 (16.69-25.65)                | 8.69 (6.99-10.73)   | 7.99 (6.42-9.86)                   | 3.34 (2.69-4.13)    |
| Curaçao                      | 14.66 (11.78-18.12)                | 10.86 (8.73-13.42)  | 20.56 (16.53-25.36)                | 15.23 (12.25-18.79) |
| Guadeloupe                   | 35.13 (28.25-43.41)                | 10.87 (8.74-13.43)  | 50.33 (40.48-62.07)                | 15.58 (12.53-19.21) |
| Martinique                   | 32.48 (26.10-40.16)                | 10.84 (8.71-13.40)  | 44.73 (35.93-55.24)                | 14.92 (11.99-18.43) |
| Puerto Rico                  | 259.90 (208.94-321.24)             | 10.81 (8.69-13.36)  | 304.32 (244.66-375.48)             | 12.66 (10.18-15.62) |
| Trinidad and Tobago          | 130.19 (104.72-160.83)             | 10.79 (8.68-13.34)  | 69.99 (56.29-86.32)                | 5.8 (4.67-7.16)     |
| United States Virgin Islands | 9.07 (7.30-11.21)                  | 10.84 (8.72-13.39)  | 13.09 (10.53-16.13)                | 15.64 (12.58-19.27) |
| Argentina                    | 4,220.30 (3,399.07-5,207.02)       | 11.22 (9.03-13.84)  | 621.98 (501.08-765.54)             | 1.65 (1.33-2.03)    |
| Chile                        | 2,501.78 (2,012.75-3,090.04)       | 15.37 (12.36-18.98) | 1,222.74 (983.20-1,508.36)         | 7.51 (6.04-9.27)    |
| French Guiana                | 27.00 (21.77-33.29)                | 10.92 (8.81-13.46)  | 41.29 (33.33-50.69)                | 16.7 (13.48-20.50)  |
| Uruguay                      | 320.00 (257.52-395.14)             | 11.22 (9.03-13.86)  | 14.16 (11.39-17.46)                | 0.50 (0.40-0.61)    |
| Canada                       | 2,973.83 (2,389.96-3,676.91)       | 9.66 (7.76-11.95)   | 5,508.26 (4,422.56-6,806.78)       | 17.9 (14.37-22.11)  |
| United States of America     | 29,757.10 (23,931.59-36,767.14)    | 10.92 (8.79-13.50)  | 40,956.46 (32,927.11-50,533.52)    | 15.03 (12.09-18.55) |
| Cyprus                       | 159.93 (128.66-197.54)             | 15.74 (12.66-19.44) | 138.73 (111.40-171.42)             | 13.65 (10.96-16.87) |
| Israel                       | 924.55 (745.02-1,140.1)            | 13.25 (10.68-16.34) | 798.09 (643.63-981.13)             | 11.44 (9.23-14.06)  |
| Czechia                      | 1,220.59 (980.84-1,509.28)         | 14.11 (11.34-17.44) | 1,113.78 (893.81-1,377.16)         | 12.87 (10.33-15.92) |
| Hungary                      | 1,099.25 (883.22-1,359.42)         | 13.85 (11.13-17.13) | 689.36 (552.94-852.85)             | 8.69 (6.97-10.75)   |
| Poland                       | 4,153.21 (3,337.10-5,136.02)       | 13.25 (10.65-16.39) | 2,951.86 (2,368.28-3,650.93)       | 9.42 (7.56-11.65)   |
| Slovakia                     | 664.72 (534.18-821.90)             | 14.47 (11.63-17.89) | 473.91 (380.22-586.15)             | 10.32 (8.28-12.76)  |
| Channel Islands              | 19.95 (16.03-24.66)                | 14.05 (11.29-17.37) | 17.10 (13.72-21.15)                | 12.04 (9.66-14.89)  |
| Denmark                      | 534.56 (429.77-660.69)             | 11.60 (9.33-14.34)  | 839.76 (674.43-1,037.38)           | 18.23 (14.64-22.52) |
| Estonia                      | 147.90 (118.87-182.85)             | 13.83 (11.11-17.10) | 137.47 (110.38-169.86)             | 12.85 (10.32-15.88) |

Finland

---

494.95 (397.84-611.87)

11.32 (9.10-13.99)

655.44 (526.44-809.61)

14.99 (12.04-18.51)

| Country        | Current wheezing                   |                     | Ever asthma                        |                     |
|----------------|------------------------------------|---------------------|------------------------------------|---------------------|
|                | Number of cases (thousand, 95% CI) | Prevalence (%)      | Number of cases (thousand, 95% CI) | Prevalence (%)      |
| Iceland        | 29.45 (23.69-36.38)                | 10.42 (8.38-12.87)  | 47.23 (37.98-58.26)                | 16.71 (13.43-20.61) |
| Ireland        | 514.57 (414.03-635.49)             | 12.59 (10.13-15.55) | 663.28 (533.60-817.76)             | 16.22 (13.05-20)    |
| Latvia         | 231.59 (186.10-286.35)             | 15.26 (12.26-18.87) | 173.98 (139.62-215.12)             | 11.46 (9.20-14.18)  |
| Lithuania      | 286.98 (230.60-354.89)             | 12.98 (10.43-16.05) | 294.74 (236.54-364.41)             | 13.33 (10.70-16.48) |
| Norway         | 505.51 (406.51-624.64)             | 11.47 (9.22-14.17)  | 896.24 (719.99-1,106.81)           | 20.33 (16.33-25.11) |
| Sweden         | 878.33 (706.21-1,085.49)           | 11.09 (8.92-13.71)  | 1,315.69 (1,057.14-1,624.46)       | 16.61 (13.35-20.51) |
| United Kingdom | 7,659.82 (6,159.39-9,465.51)       | 14.09 (11.33-17.41) | 7,333.47 (5,892.47-9,054.36)       | 13.49 (10.84-16.65) |
| Croatia        | 502.87 (404.02-621.93)             | 15.04 (12.08-18.6)  | 300.46 (241.09-371.57)             | 8.99 (7.21-11.11)   |
| Greece         | 1,320.80 (1,061.43-1,633.08)       | 15.90 (12.78-19.66) | 774.83 (621.61-958.39)             | 9.33 (7.48-11.54)   |
| Italy          | 5,834.37 (4,687.11-7,216.27)       | 12.25 (9.84-15.16)  | 4,452.15 (3,570.52-5,509.13)       | 9.35 (7.50-11.57)   |
| Malta          | 44.56 (35.81-55.11)                | 12.66 (10.17-15.65) | 34.95 (28.04-43.24)                | 9.93 (7.96-12.28)   |
| Portugal       | 1,027.72 (825.74-1,270.97)         | 12.67 (10.18-15.66) | 334.75 (268.47-414.21)             | 4.13 (3.31-5.11)    |
| Slovenia       | 200.98 (161.46-248.59)             | 11.93 (9.58-14.76)  | 212.21 (170.27-262.45)             | 12.6 (10.11-15.58)  |
| Spain          | 4,922.36 (3,955.48-6,086.72)       | 13.03 (10.47-16.11) | 2,500.16 (2,005.88-3,092.29)       | 6.62 (5.31-8.18)    |
| Austria        | 966.92 (776.97-1,195.66)           | 13.37 (10.74-16.53) | 984.54 (789.72-1218.00)            | 13.61 (10.92-16.84) |
| Belgium        | 1,178.35 (947.34-1,456.40)         | 12.65 (10.17-15.64) | 1,390.48 (1,116.95-1,717.32)       | 14.93 (11.99-18.44) |
| France         | 7,424.13 (5,969.67-9,174.56)       | 14.34 (11.53-17.72) | 6,915.35 (5,558-8,535.42)          | 13.36 (10.74-16.49) |
| Germany        | 8,560.49 (6,877.24-10,588.01)      | 12.95 (10.40-16.01) | 12,089.65 (9,696.24-14,958.61)     | 18.28 (14.66-22.62) |
| Luxembourg     | 63.10 (50.72-77.99)                | 12.11 (9.73-14.97)  | 95.70 (76.79-118.36)               | 18.37 (14.74-22.71) |
| Netherlands    | 1,726.23 (1,387.58-2,133.92)       | 12.5 (10.05-15.45)  | 2,434.39 (1,954.59-3,008.23)       | 17.63 (14.15-21.78) |
| Switzerland    | 879.56 (706.82-1,087.56)           | 12.68 (10.19-15.68) | 1,463.27 (1,173.95-1,809.85)       | 21.09 (16.92-26.09) |
| Bahrain        | 198.04 (159.41-244.45)             | 13.08 (10.53-16.15) | 85.62 (68.73-105.84)               | 5.66 (4.54-6.99)    |
| Kuwait         | 513.06 (413.00-633.25)             | 13.28 (10.69-16.39) | 462.30 (371.55-570.67)             | 11.97 (9.62-14.77)  |
| Oman           | 448.07 (360.82-552.84)             | 10.04 (8.09-12.39)  | 334.71 (268.99-413.17)             | 7.50 (6.03-9.26)    |
| Qatar          | 314.42 (253.03-388.16)             | 11.74 (9.45-14.49)  | 265.60 (212.73-329.16)             | 9.91 (7.94-12.29)   |
| Saudi Arabia   | 3,430.72 (2,763.67-4,231.63)       | 11.18 (9.01-13.79)  | 2,835.21 (2,282.20-3,493.28)       | 9.24 (7.44-11.38)   |

| Country                         | Current wheezing                   |                     | Ever asthma                        |                     |
|---------------------------------|------------------------------------|---------------------|------------------------------------|---------------------|
|                                 | Number of cases (thousand, 95% CI) | Prevalence (%)      | Number of cases (thousand, 95% CI) | Prevalence (%)      |
| State of Palestine              | 507.17 (409.68-623.93)             | 12.05 (9.73-14.82)  | 434.81 (351.87-532.36)             | 10.33 (8.36-12.64)  |
| United Arab Emirates            | 1,142.90 (919.75-1,410.99)         | 12.41 (9.99-15.32)  | 1,180.48 (946.05-1,461.95)         | 12.82 (10.27-15.87) |
| China, Hong Kong SAR            | 776.13 (623.39-960.08)             | 12.57 (10.1-15.55)  | 969.75 (776.71-1201.76)            | 15.71 (12.58-19.46) |
| China, Macao SAR                | 71.88 (57.75-88.88)                | 12.80 (10.28-15.82) | 89.01 (71.32-110.25)               | 15.85 (12.7-19.63)  |
| China, Taiwan Province of China | 2,654.01 (2,133.09-3,280.85)       | 13.01 (10.46-16.08) | 3,150.75 (2,524.88-3,902.21)       | 15.45 (12.38-19.13) |
| Japan                           | 11,341.30 (9,114.00-14,022.33)     | 12.02 (9.66-14.86)  | 15,220.2 (12,207.53-18,831.26)     | 16.13 (12.93-19.95) |
| Republic of Korea               | 5,605.77 (4,505.54-6,929.77)       | 12.77 (10.27-15.79) | 6,807.92 (5,456.36-8,430.27)       | 15.51 (12.43-19.21) |
| Brunei Darussalam               | 44.77 (36.06-55.23)                | 11.51 (9.27-14.20)  | 64.44 (51.85-79.44)                | 16.57 (13.33-20.42) |
| Singapore                       | 577.07 (463.62-713.65)             | 11.27 (9.05-13.93)  | 755.21 (604.76-936.09)             | 14.74 (11.81-18.27) |
| Australia                       | 2,042.65 (1,643.20-2,523.12)       | 9.88 (7.95-12.20)   | 2,696.05 (2,167.44-3,326.63)       | 13.04 (10.48-16.09) |
| New Zealand                     | 389.32 (313.20-480.86)             | 9.88 (7.95-12.21)   | 523.60 (421.06-645.84)             | 13.29 (10.69-16.40) |
| New Caledonia                   | 32.38 (26.08-39.94)                | 13.19 (10.62-16.26) | 41.35 (33.27-50.95)                | 16.84 (13.55-20.75) |
| Guam                            | 18.90 (15.23-23.31)                | 13.25 (10.68-16.34) | 15.82 (12.74-19.48)                | 11.09 (8.93-13.66)  |
| Burundi                         | 1,357.82 (1,079.39-1,696.80)       | 14.43 (11.47-18.03) | 1,236.02 (983.65-1,542.57)         | 13.14 (10.45-16.40) |
| Comoros                         | 102.19 (81.17-127.79)              | 14.27 (11.34-17.85) | 90.97 (72.31-113.70)               | 12.70 (10.10-15.88) |
| Eritrea                         | 394.63 (313.59-493.32)             | 13.55 (10.77-16.93) | 389.53 (309.83-486.45)             | 13.37 (10.64-16.70) |
| Ethiopia                        | 12,596.34 (10,009.66-15,746.94)    | 13.49 (10.72-16.87) | 11,723.08 (9,321.54-14,645.66)     | 12.56 (9.98-15.69)  |
| Kenya                           | 6,212.09 (4,935.81-7,766.74)       | 13.80 (10.96-17.25) | 5,591.49 (4,444.97-6,987.52)       | 12.42 (9.87-15.52)  |
| Madagascar                      | 3,487.12 (2,770.90-4,359.40)       | 15.48 (12.3-19.35)  | 3,120.46 (2,480.87-3,899.06)       | 13.85 (11.01-17.31) |
| Malawi                          | 2,217.43 (1,762.89-2,770.78)       | 14.30 (11.37-17.87) | 2,009.52 (1,598.85-2,508.60)       | 12.96 (10.31-16.18) |
| Mauritius                       | 97.11 (76.85-121.88)               | 8.75 (6.93-10.99)   | 87.42 (69.14-109.93)               | 7.88 (6.23-9.91)    |
| Mayotte                         | 30.34 (24.10-37.93)                | 13.54 (10.76-16.93) | 29.40 (23.38-36.74)                | 13.12 (10.43-16.40) |
| Mozambique                      | 3,612.44 (2,872.03-4,513.77)       | 14.52 (11.55-18.15) | 3,497.35 (2,782.93-4,365.35)       | 14.06 (11.19-17.55) |
| Réunion                         | 100.14 (79.30-125.62)              | 13.32 (10.55-16.71) | 99.34 (78.69-124.69)               | 13.21 (10.47-16.58) |
| Rwanda                          | 1,528.14 (1,213.89-1,911.03)       | 14.44 (11.47-18.05) | 1,320.00 (1,049.33-1,649.57)       | 12.47 (9.91-15.58)  |
| Seychelles                      | 7.27 (5.76-9.12)                   | 8.56 (6.78-10.73)   | 7.37 (5.84-9.25)                   | 8.67 (6.87-10.88)   |

| Country                          | Current wheezing                   |                     | Ever asthma                        |                     |
|----------------------------------|------------------------------------|---------------------|------------------------------------|---------------------|
|                                  | Number of cases (thousand, 95% CI) | Prevalence (%)      | Number of cases (thousand, 95% CI) | Prevalence (%)      |
| South Sudan                      | 1,359.67 (1,080.56-1,699.57)       | 14.85 (11.80-18.57) | 1,198.61 (953.25-1,497.09)         | 13.09 (10.41-16.35) |
| Uganda                           | 5,159.79 (4,103.5-6,445.28)        | 14.22 (11.31-17.77) | 4,902.04 (3,902.20-6,115.75)       | 13.51 (10.76-16.86) |
| United Republic of Tanzania      | 6,329.01 (5,030.79-7,909.69)       | 13.26 (10.54-16.58) | 6,160.42 (4,901.18-7,690.97)       | 12.91 (10.27-16.12) |
| Zambia                           | 2,045.30 (1,626.30-2,555.28)       | 13.82 (10.99-17.27) | 2,015.66 (1,603.94-2,515.85)       | 13.62 (10.84-17.00) |
| Zimbabwe                         | 1,577.03 (1,253.52-1,970.96)       | 12.79 (10.17-15.98) | 1,530.98 (1,218.03-1,911.37)       | 12.41 (9.88-15.50)  |
| Angola                           | 2,993.75 (2,380.58-3,740.02)       | 11.59 (9.21-14.47)  | 3,477.04 (2,767.77-4,338.10)       | 13.46 (10.71-16.79) |
| Cameroon                         | 2,708.09 (2,152.25-3,384.99)       | 12.60 (10.02-15.75) | 2,861.41 (2,275.95-3,573.42)       | 13.32 (10.59-16.63) |
| Central African Republic         | 588.18 (467.74-734.76)             | 14.90 (11.85-18.61) | 576.98 (459.14-720.12)             | 14.61 (11.63-18.24) |
| Chad                             | 1,844.82 (1,467.16-2,304.4)        | 14.31 (11.38-17.87) | 1,773.38 (1,411.7-2,212.41)        | 13.75 (10.95-17.16) |
| Congo                            | 565.36 (449.23-706.81)             | 12.56 (9.98-15.71)  | 611.11 (486-763.33)                | 13.58 (10.8-16.96)  |
| Democratic Republic of the Congo | 10,258.98 (8,156.54-12,818.17)     | 14.66 (11.66-18.32) | 10,018.30 (7,973.71-12,501.19)     | 14.32 (11.4-17.87)  |
| Equatorial Guinea                | 151.49 (120.30-189.50)             | 13.22 (10.49-16.53) | 149.19 (118.5-186.64)              | 13.02 (10.34-16.28) |
| Gabon                            | 159.30 (126.47-199.33)             | 8.78 (6.97-10.99)   | 207.28 (164.67-259.25)             | 11.42 (9.08-14.29)  |
| Sao Tome and Principe            | 22.91 (18.21-28.64)                | 12.71 (10.10-15.89) | 25.75 (20.49-32.16)                | 14.28 (11.36-17.84) |
| Botswana                         | 230.21 (182.72-288.13)             | 11.63 (9.23-14.56)  | 237.21 (188.34-296.86)             | 11.99 (9.52-15.00)  |
| Eswatini                         | 127.82 (101.55-159.82)             | 13.08 (10.39-16.35) | 114.67 (91.15-143.32)              | 11.73 (9.33-14.66)  |
| Lesotho                          | 242.04 (192.12-302.90)             | 13.37 (10.61-16.73) | 203.18 (161.27-254.39)             | 11.22 (8.91-14.05)  |
| Namibia                          | 251.01 (199.33-314.01)             | 11.88 (9.44-14.87)  | 249.32 (198.10-311.75)             | 11.80 (9.38-14.76)  |
| South Africa                     | 4,869.11 (3,861.24-6,099.23)       | 9.55 (7.57-11.96)   | 5,189.59 (4,116.14-6,503.29)       | 10.17 (8.07-12.75)  |
| Benin                            | 1,340.88 (1,065.57-1,676.19)       | 13.79 (10.96-17.24) | 1,349.57 (1,073.40-1,685.46)       | 13.88 (11.04-17.34) |
| Burkina Faso                     | 2,361.05 (1,877.14-2,950.09)       | 14.15 (11.25-17.68) | 2,273.09 (1,808.73-2,837.31)       | 13.62 (10.84-17)    |
| Cabo Verde                       | 45.30 (35.93-56.75)                | 9.37 (7.43-11.74)   | 50.83 (40.31-63.71)                | 10.52 (8.34-13.18)  |
| Côte d'Ivoire                    | 2,743.77 (2,180.57-3,429.61)       | 12.88 (10.23-16.1)  | 2,811.06 (2,235.54-3,511.22)       | 13.19 (10.49-16.48) |
| Gambia                           | 281.84 (224.05-352.20)             | 14.70 (11.69-18.37) | 285.59 (227.22-356.54)             | 14.90 (11.85-18.6)  |
| Ghana                            | 3,085.53 (2,450.15-3,860.00)       | 11.95 (9.49-14.95)  | 3,190.98 (2,535.51-3,989.95)       | 12.36 (9.82-15.46)  |
| Guinea                           | 1,558.08 (1,238.64-1,946.97)       | 14.79 (11.76-18.48) | 1,484.50 (1,181.02-1,853.38)       | 14.09 (11.21-17.59) |

| Country       | Current wheezing                   |                     | Ever asthma                        |                     |
|---------------|------------------------------------|---------------------|------------------------------------|---------------------|
|               | Number of cases (thousand, 95% CI) | Prevalence (%)      | Number of cases (thousand, 95% CI) | Prevalence (%)      |
| Guinea-Bissau | 235.62 (187.25-294.54)             | 14.77 (11.73-18.46) | 225.22 (179.13-281.28)             | 14.11 (11.23-17.63) |
| Liberia       | 587.27 (466.63-734.23)             | 14.24 (11.32-17.81) | 580.85 (461.86-725.64)             | 14.09 (11.20-17.60) |
| Mali          | 2,348.81 (1,868.04-2,933.84)       | 14.77 (11.75-18.45) | 2,359.42 (1,878.37-2,943.25)       | 14.84 (11.81-18.51) |
| Mauritania    | 446.43 (354.64-558.26)             | 11.83 (9.40-14.79)  | 466.11 (370.53-582.49)             | 12.35 (9.82-15.44)  |
| Niger         | 2,606.78 (2,073.59-3,255.48)       | 14.18 (11.28-17.71) | 2,538.88 (2,022.1-3,165.47)        | 13.81 (11.00-17.22) |
| Nigeria       | 21,888.51 (17,396.47-27,358.82)    | 13.26 (10.54-16.57) | 22,382.08 (17,806.27-27,944.38)    | 13.56 (10.79-16.93) |
| Senegal       | 1,714.85 (1,362.86-2,143.52)       | 12.73 (10.12-15.91) | 1,785.64 (1,420.49-2,229.58)       | 13.26 (10.54-16.55) |
| Sierra Leone  | 1,004.39 (798.15-1,255.57)         | 15.33 (12.18-19.16) | 928.14 (738.02-1,159.50)           | 14.17 (11.26-17.70) |
| Togo          | 918.84 (730.07-1,148.78)           | 13.58 (10.79-16.97) | 896.87 (713.18-1,120.40)           | 13.25 (10.54-16.55) |

| Country                            | Current wheezing                   |                     | Ever asthma                        |                     |
|------------------------------------|------------------------------------|---------------------|------------------------------------|---------------------|
|                                    | Number of cases (thousand, 95% CI) | Prevalence (%)      | Number of cases (thousand, 95% CI) | Prevalence (%)      |
| Algeria                            | 2,923.38 (2,317.66-3,662.84)       | 8.05 (6.38-10.08)   | 3,546.38 (2,813.30-4,443.24)       | 9.76 (7.74-12.23)   |
| Western Sahara                     | 69.53 (55.12-87.11)                | 13.42 (10.64-16.81) | 67.76 (53.72-84.98)                | 13.08 (10.37-16.40) |
| Cuba                               | 969.28 (766.57-1,217.40)           | 10.18 (8.05-12.78)  | 753.44 (595.73-947.77)             | 7.91 (6.26-9.95)    |
| Dominican Republic                 | 827.57 (656.12-1,036.90)           | 8.96 (7.11-11.23)   | 798.49 (633.27-1,000.74)           | 8.65 (6.86-10.84)   |
| Grenada                            | 8.94 (7.08-11.21)                  | 9.32 (7.38-11.69)   | 6.80 (5.39-8.54)                   | 7.09 (5.62-8.90)    |
| Haiti                              | 1,259.15 (999.31-1,576.08)         | 13.03 (10.34-16.3)  | 1,045.92 (830.44-1,309.02)         | 10.82 (8.59-13.54)  |
| Jamaica                            | 235.88 (186.89-295.73)             | 9.28 (7.35-11.64)   | 195.36 (154.78-245.13)             | 7.69 (6.09-9.65)    |
| Saint Lucia                        | 14.24 (11.27-17.86)                | 8.94 (7.08-11.22)   | 9.78 (7.74-12.30)                  | 6.14 (4.86-7.72)    |
| Saint Vincent and the Grenadines   | 8.68 (6.88-10.89)                  | 9.06 (7.18-11.37)   | 7.10 (5.62-8.91)                   | 7.40 (5.86-9.29)    |
| Belize                             | 32.98 (26.17-41.30)                | 9.72 (7.71-12.16)   | 27.45 (21.78-34.39)                | 8.09 (6.42-10.13)   |
| Costa Rica                         | 376.32 (297.98-472.10)             | 8.63 (6.83-10.82)   | 340.32 (269.44-427.40)             | 7.80 (6.18-9.80)    |
| El Salvador                        | 491.98 (390.08-616.38)             | 8.93 (7.08-11.19)   | 463.66 (367.68-581.15)             | 8.42 (6.68-10.55)   |
| Guatemala                          | 1,734.00 (1,376.68-2,169.65)       | 11.56 (9.18-14.46)  | 1,459.61 (1,159.17-1,826.24)       | 9.73 (7.73-12.18)   |
| Honduras                           | 930.09 (738.14-1,164.20)           | 11.01 (8.74-13.78)  | 795.87 (631.66-996.53)             | 9.42 (7.48-11.80)   |
| Mexico                             | 10,458.76 (8,290.24-13,107.03)     | 9.46 (7.50-11.85)   | 9,536.92 (7,560.55-11,958.10)      | 8.62 (6.84-10.81)   |
| Nicaragua                          | 647.07 (513.22-810.41)             | 11.40 (9.04-14.28)  | 537.29 (426.28-673.04)             | 9.47 (7.51-11.86)   |
| Panama                             | 317.60 (251.74-398.04)             | 8.77 (6.95-10.99)   | 288.93 (229.08-362.22)             | 7.98 (6.32-10.00)   |
| Bolivia (Plurinational State of)   | 943.84 (748.86-1,181.73)           | 9.67 (7.67-12.11)   | 861.25 (683.56-1078.39)            | 8.82 (7.00-11.05)   |
| Brazil                             | 16,200.03 (12,828.26-20,322.03)    | 8.81 (6.98-11.06)   | 14,822.16 (11,734.61-18,615.77)    | 8.06 (6.38-10.13)   |
| Colombia                           | 3,781.47 (2,995.64-4,741.76)       | 8.64 (6.84-10.83)   | 3,520.98 (2,788.81-4,419.68)       | 8.04 (6.37-10.10)   |
| Ecuador                            | 1,360.13 (1,078.40-1,704.09)       | 9.13 (7.24-11.44)   | 1,202.46 (953.58-1,507.14)         | 8.07 (6.4-10.12)    |
| Guyana                             | 65.83 (52.20-82.46)                | 9.74 (7.73-12.2)    | 50.62 (40.15-63.43)                | 7.49 (5.94-9.39)    |
| Paraguay                           | 617.79 (490.03-773.69)             | 10.20 (8.09-12.78)  | 531.53 (421.68-665.90)             | 8.78 (6.96-11.00)   |
| Peru                               | 2,619.08 (2,075.10-3,283.69)       | 9.39 (7.44-11.77)   | 2,343.69 (1,857.15-2,940.35)       | 8.40 (6.66-10.54)   |
| Suriname                           | 46.07 (36.52-57.73)                | 9.15 (7.25-11.47)   | 40.63 (32.21-50.93)                | 8.07 (6.40-10.12)   |
| Venezuela (Bolivarian Republic of) | 2,227.91 (1,766.10-2,791.86)       | 9.00 (7.14-11.28)   | 2,157.37 (1,711.16-2,703.42)       | 8.72 (6.92-10.93)   |
| Bangladesh                         | 19,266.07 (15,281.52-24,127.90)    | 13.46 (10.67-16.85) | 14,302.13 (11,340.35-17,929.00)    | 9.99 (7.92-12.52)   |

| Country                         | Current wheezing                   |                     | Ever asthma                        |                    |
|---------------------------------|------------------------------------|---------------------|------------------------------------|--------------------|
|                                 | Number of cases (thousand, 95% CI) | Prevalence (%)      | Number of cases (thousand, 95% CI) | Prevalence (%)     |
| Bhutan                          | 66.74 (52.92-83.59)                | 9.99 (7.92-12.51)   | 56.48 (44.77-70.85)                | 8.45 (6.70-10.60)  |
| India                           | 134,560.31 (106,691.80-168,578.76) | 11.22 (8.90-14.06)  | 105,727.37 (83,817.84-132,567.25)  | 8.82 (6.99-11.06)  |
| Maldives                        | 42.37 (33.58-53.12)                | 8.76 (6.95-10.99)   | 34.46 (27.26-43.32)                | 7.13 (5.64-8.96)   |
| Nepal                           | 3,234.17 (2,566.37-4,048.81)       | 12.96 (10.29-16.23) | 2,428.48 (1,926.97-3,041.59)       | 9.73 (7.72-12.19)  |
| Sri Lanka                       | 2,252.07 (1,783.85-2,824.26)       | 12.39 (9.82-15.54)  | 1,547.57 (1,226.23-1,941.69)       | 8.52 (6.75-10.69)  |
| Dem. People's Republic of Korea | 2,529.46 (2,002.80-3,173.27)       | 11.40 (9.03-14.30)  | 2,000.09 (1,582.91-2,513.07)       | 9.02 (7.14-11.33)  |
| Indonesia                       | 26,111.82 (20,701.16-32,716.52)    | 11.00 (8.72-13.78)  | 21,045.78 (16,681.51-26,394.47)    | 8.87 (7.03-11.12)  |
| Myanmar                         | 6,269.54 (4,970.17-7,856.05)       | 13.13 (10.41-16.45) | 4,536.62 (3,595.94-5,689.37)       | 9.50 (7.53-11.91)  |
| Thailand                        | 6,064.30 (4,797.69-7,613.92)       | 10.07 (7.96-12.64)  | 4,660.74 (3,685.53-5,862.01)       | 7.74 (6.12-9.73)   |
| Timor-Leste                     | 168.88 (134.18-211.16)             | 15.59 (12.38-19.49) | 124.17 (98.67-155.26)              | 11.46 (9.11-14.33) |
| Armenia                         | 239.40 (189.48-300.45)             | 9.45 (7.48-11.85)   | 160.67 (127.18-201.82)             | 6.34 (5.02-7.96)   |
| Azerbaijan                      | 804.93 (637.48-1,009.59)           | 9.09 (7.20-11.40)   | 549.93 (435.54-690.37)             | 6.21 (4.92-7.79)   |
| Georgia                         | 348.08 (275.44-436.93)             | 10.46 (8.28-13.13)  | 219.59 (173.82-275.83)             | 6.60 (5.22-8.29)   |
| Turkey                          | 7,129.77 (5,649.62-8,937.89)       | 9.88 (7.83-12.39)   | 5,021.33 (3,979.07-6,299.38)       | 6.96 (5.51-8.73)   |
| Kazakhstan                      | 1,489.44 (1,180.22-1,867.16)       | 9.42 (7.47-11.81)   | 1,041.85 (826.33-1,305.65)         | 6.59 (5.23-8.26)   |
| Kyrgyzstan                      | 586.19 (465.00-734.07)             | 10.64 (8.44-13.33)  | 384.42 (305.15-481.26)             | 6.98 (5.54-8.74)   |
| Tajikistan                      | 820.95 (651.70-1,027.33)           | 10.47 (8.31-13.10)  | 548.11 (435.47-685.45)             | 6.99 (5.55-8.74)   |
| Turkmenistan                    | 486.13 (385.51-608.95)             | 9.46 (7.50-11.85)   | 343.44 (272.53-430.14)             | 6.68 (5.30-8.37)   |
| Uzbekistan                      | 2,653.96 (2,104.07-3,325.36)       | 9.22 (7.31-11.55)   | 1,892.73 (1,501.04-2,372.21)       | 6.57 (5.21-8.24)   |
| Belarus                         | 747.80 (591.21-939.54)             | 9.34 (7.38-11.74)   | 507.23 (401.12-637.93)             | 6.34 (5.01-7.97)   |
| Bulgaria                        | 582.54 (460.43-732.09)             | 10.33 (8.17-12.99)  | 363.75 (287.53-457.71)             | 6.45 (5.10-8.12)   |
| Republic of Moldova             | 346.66 (274.13-435.45)             | 9.73 (7.69-12.22)   | 203.02 (160.48-255.46)             | 5.70 (4.50-7.17)   |
| Romania                         | 1,660.09 (1,312.53-2,085.62)       | 10.41 (8.23-13.08)  | 987.04 (780.37-1,241.73)           | 6.19 (4.90-7.79)   |
| Russian Federation              | 12,082.34 (9,553.96-15,177.64)     | 9.88 (7.81-12.41)   | 7,942.89 (6,283.04-9,986.17)       | 6.49 (5.14-8.16)   |
| Ukraine                         | 3,494.12 (2,762.51-4,389.87)       | 9.44 (7.46-11.86)   | 2,282.30 (1,804.55-2,870.96)       | 6.17 (4.87-7.76)   |



| Country                          | Current wheezing                   |                     | Ever asthma                        |                     |
|----------------------------------|------------------------------------|---------------------|------------------------------------|---------------------|
|                                  | Number of cases (thousand, 95% CI) | Prevalence (%)      | Number of cases (thousand, 95% CI) | Prevalence (%)      |
| Albania                          | 258.23 (204.36-324.11)             | 10.61 (8.40-13.32)  | 161.01 (127.37-202.42)             | 6.61 (5.23-8.32)    |
| Bosnia and Herzegovina           | 358.00 (283.00-449.86)             | 12.80 (10.12-16.08) | 192.57 (152.22-242.31)             | 6.88 (5.44-8.66)    |
| Montenegro                       | 61.29 (48.49-76.95)                | 11.58 (9.16-14.54)  | 37.22 (29.45-46.78)                | 7.03 (5.57-8.84)    |
| North Macedonia                  | 175.48 (138.79-220.38)             | 9.83 (7.78-12.35)   | 108.63 (85.89-136.64)              | 6.09 (4.81-7.66)    |
| Serbia                           | 857.23 (677.82-1076.89)            | 11.79 (9.32-14.81)  | 486.23 (384.45-611.62)             | 6.69 (5.29-8.41)    |
| Djibouti                         | 121.58 (96.44-152.24)              | 14.33 (11.37-17.95) | 104.10 (82.56-130.45)              | 12.27 (9.73-15.38)  |
| Somalia                          | 1,827.27 (1,453.17-2,282.49)       | 14.67 (11.67-18.32) | 1,724.45 (1,372.64-2,151.56)       | 13.84 (11.02-17.27) |
| Egypt                            | 7,879.56 (6,252.45-9,864.08)       | 9.30 (7.38-11.64)   | 7,320.26 (5,812.31-9,161.38)       | 8.64 (6.86-10.81)   |
| Libya                            | 644.56 (511.09-807.46)             | 10.79 (8.55-13.51)  | 601.46 (476.93-753.96)             | 10.07 (7.98-12.62)  |
| Morocco                          | 2,766.99 (2,192.91-3,468.12)       | 8.76 (6.95-10.98)   | 2,776.05 (2,200.93-3,480.52)       | 8.79 (6.97-11.02)   |
| Sudan                            | 4,268.90 (3,391.90-5,337.08)       | 11.95 (9.49-14.94)  | 3,809.51 (3,028.85-4,759.75)       | 10.66 (8.48-13.32)  |
| Tunisia                          | 937.46 (742.50-1,175.72)           | 9.30 (7.36-11.66)   | 874.21 (692.55-1,097.14)           | 8.67 (6.87-10.88)   |
| Iraq                             | 3,047.51 (2,420.65-3,811.31)       | 9.14 (7.26-11.43)   | 3,290.46 (2,615.04-4,113.39)       | 9.87 (7.85-12.34)   |
| Jordan                           | 809.25 (642.43-1,012.61)           | 9.19 (7.29-11.5)    | 892.14 (708.43-1,116.38)           | 10.13 (8.04-12.68)  |
| Lebanon                          | 701.94 (556.30-879.81)             | 11.76 (9.32-14.74)  | 628.89 (498.43-788.80)             | 10.53 (8.35-13.21)  |
| Syrian Arab Republic             | 1,350.63 (1,071.50-1,691.15)       | 9.17 (7.28-11.49)   | 1,321.10 (1,048.19-1,654.84)       | 8.97 (7.12-11.24)   |
| Yemen                            | 2,736.49 (2,174.13-3,421.53)       | 11.09 (8.81-13.87)  | 2,572.52 (2,045.01-3,214.85)       | 10.43 (8.29-13.03)  |
| Afghanistan                      | 4,088.76 (3,250.73-5,108.80)       | 12.79 (10.17-15.99) | 3,614.11 (2,874.88-4,512.92)       | 11.31 (9.00-14.12)  |
| Iran (Islamic Republic of)       | 6,176.24 (4,891.90-7,745.82)       | 8.56 (6.78-10.73)   | 6,336.54 (5,019.16-7,953.51)       | 8.78 (6.95-11.02)   |
| Pakistan                         | 21,999.25 (17,465.24-27,526.45)    | 11.99 (9.52-15.01)  | 19,131.56 (15,194.1-23,936.22)     | 10.43 (8.28-13.05)  |
| China                            | 141,265.12 (111,759.24-177,360.43) | 11.28 (8.93-14.17)  | 93,753.42 (74,139.29-117,913.23)   | 7.49 (5.92-9.42)    |
| Mongolia                         | 336.35 (266.69-421.39)             | 12.11 (9.60-15.17)  | 251.04 (199.16-314.51)             | 9.04 (7.17-11.32)   |
| Cambodia                         | 1,852.55 (1,469.67-2,319.69)       | 12.96 (10.28-16.22) | 1,242.88 (986.32-1,556.50)         | 8.69 (6.90-10.89)   |
| Lao People's Democratic Republic | 912.43 (724.19-1,141.96)           | 14.68 (11.65-18.38) | 590.27 (468.54-738.98)             | 9.50 (7.54-11.89)   |
| Malaysia                         | 2,563.28 (2,031.39-3,212.85)       | 9.16 (7.26-11.49)   | 2,101.81 (1,664.88-2,638.02)       | 7.51 (5.95-9.43)    |

| Country          | Current wheezing                   |                     | Ever asthma                        |                    |
|------------------|------------------------------------|---------------------|------------------------------------|--------------------|
|                  | Number of cases (thousand, 95% CI) | Prevalence (%)      | Number of cases (thousand, 95% CI) | Prevalence (%)     |
| Philippines      | 11,537.20 (9,153.92-14,444.37)     | 12.25 (9.72-15.34)  | 8,206.83 (6,512.75-10,277.55)      | 8.71 (6.92-10.91)  |
| Viet Nam         | 9,441.48 (7,478.34-11,840.28)      | 11.24 (8.90-14.09)  | 6,128.99 (4,853.68-7,695.03)       | 7.29 (5.78-9.16)   |
| Fiji             | 103.96 (82.43-130.23)              | 13.46 (10.67-16.86) | 71.29 (56.55-89.33)                | 9.23 (7.32-11.57)  |
| Papua New Guinea | 11,06.39 (878.54-1,384.10)         | 14.69 (11.66-18.37) | 708.41 (562.67-886.22)             | 9.40 (7.47-11.76)  |
| Solomon Islands  | 86.97 (69.10-108.74)               | 15.69 (12.46-19.61) | 57.57 (45.77-71.93)                | 10.38 (8.26-12.97) |
| Vanuatu          | 36.12 (28.69-45.18)                | 14.29 (11.35-17.88) | 24.64 (19.58-30.8)                 | 9.75 (7.75-12.19)  |
| Kiribati         | 16.87 (13.39-21.11)                | 16.89 (13.41-21.13) | 11.17 (8.87-13.97)                 | 11.19 (8.89-13.99) |

| Country                     | Current wheezing                   |                     | Ever asthma                        |                   |
|-----------------------------|------------------------------------|---------------------|------------------------------------|-------------------|
|                             | Number of cases (thousand, 95% CI) | Prevalence (%)      | Number of cases (thousand, 95% CI) | Prevalence (%)    |
| Micronesia (Fed. States of) | 11.38 (9.03-14.24)                 | 11.44 (9.08-14.32)  | 7.59 (6.03-9.51)                   | 7.63 (6.06-9.56)  |
| French Polynesia            | 27.68 (21.92-34.71)                | 11.33 (8.97-14.21)  | 19.43 (15.38-24.39)                | 7.95 (6.30-9.99)  |
| Samoa                       | 21.87 (17.37-27.37)                | 13.30 (10.56-16.64) | 14.30 (11.36-17.88)                | 8.70 (6.91-10.87) |
| Tonga                       | 11.12 (8.83-13.91)                 | 12.55 (9.97-15.70)  | 7.49 (5.95-9.37)                   | 8.45 (6.72-10.57) |

**Table S10. Pooled odds ratios of associated factors of current wheezing and ever asthma by World Bank region**

| Factor                        | WB region | Current wheezing |            |          |          | Ever asthma |            |          |          |
|-------------------------------|-----------|------------------|------------|----------|----------|-------------|------------|----------|----------|
|                               |           | Data points      | Odds ratio | Lower CI | Upper CI | Data points | Odds ratio | Lower CI | Upper CI |
| Age <7                        | Global    | 6                | 0.773      | 0.613    | 0.975    | 11          | 1.078      | 0.927    | 1.254    |
|                               | HIC       | 3                | 0.980      | 0.897    | 1.071    | 8           | 1.071      | 0.916    | 1.251    |
|                               | LMIC      | 3                | 0.630      | 0.425    | 0.931    | 3           | 1.210      | 0.754    | 1.941    |
| Age 8-14                      | Global    | 6                | 0.973      | 0.877    | 1.080    | 6           | 1.110      | 0.987    | 1.248    |
|                               | HIC       | 3                | 0.930      | 0.896    | 0.965    | 3           | 1.056      | 0.963    | 1.158    |
|                               | LMIC      | 3                | 1.025      | 0.810    | 1.296    | 3           | 1.411      | 0.875    | 2.276    |
| Age 15+                       | Global    | 3                | 0.960      | 0.865    | 1.066    | 9           | 1.341      | 1.109    | 1.623    |
|                               | HIC       | 3                | 0.960      | 0.865    | 1.066    | 6           | 1.201      | 0.979    | 1.472    |
|                               | LMIC      | -                | -          | -        | -        | 3           | 1.933      | 1.591    | 2.348    |
| Age 50+                       | Global    | 3                | 1.066      | 0.727    | 1.562    | 6           | 1.118      | 0.964    | 1.298    |
|                               | HIC       | 3                | 1.066      | 0.727    | 1.562    | 3           | 1.193      | 0.983    | 1.447    |
|                               | LMIC      | -                | -          | -        | -        | 3           | 1.042      | 1.032    | 1.053    |
| Allergic rhinitis             | Global    | 3                | 3.070      | 2.549    | 3.698    | 6           | 6.485      | 3.628    | 11.59    |
|                               | HIC       | 3                | 3.070      | 2.549    | 3.698    | 3           | 3.885      | 3.038    | 4.968    |
|                               | LMIC      | -                | -          | -        | -        | 3           | 11.962     | 3.105    | 46.083   |
| Atopy/Allergies               | Global    | 6                | 2.445      | 1.935    | 3.09     | 15          | 4.089      | 3.399    | 4.92     |
|                               | HIC       | 3                | 2.147      | 1.756    | 2.625    | 11          | 4.294      | 3.516    | 5.245    |
|                               | LMIC      | 3                | 3.210      | 2.550    | 4.040    | 4           | 3.567      | 2.171    | 5.859    |
| Bedroom sharing               | Global    | 3                | 0.975      | 0.709    | 1.340    | -           | -          | -        | -        |
|                               | HIC       | 3                | 0.975      | 0.709    | 1.340    | -           | -          | -        | -        |
|                               | LMIC      | -                | -          | -        | -        | -           | -          | -        | -        |
| Biomass                       | Global    | 10               | 1.135      | 1.053    | 1.351    | 6           | 1.219      | 1.079    | 1.518    |
|                               | HIC       | 6                | 1.010      | 0.892    | 1.145    | 3           | 1.065      | 0.831    | 1.366    |
|                               | LMIC      | 4                | 1.506      | 1.089    | 2.522    | 3           | 1.295      | 1.053    | 1.760    |
| Birth weight <2.5 Kg          | Global    | 3                | 1.766      | 0.963    | 3.240    | -           | -          | -        | -        |
|                               | HIC       | 3                | 1.766      | 0.963    | 3.240    | -           | -          | -        | -        |
|                               | LMIC      | -                | -          | -        | -        | -           | -          | -        | -        |
| BMI <18.5 Kg/m <sup>2</sup>   | Global    | -                | -          | -        | -        | 3           | 1.270      | 0.781    | 2.068    |
|                               | HIC       | -                | -          | -        | -        | 3           | 1.270      | 0.781    | 2.068    |
|                               | LMIC      | -                | -          | -        | -        | -           | -          | -        | -        |
| BMI 25-29.9 Kg/m <sup>2</sup> | Global    | 4                | 1.169      | 0.678    | 2.015    | 10          | 0.993      | 0.863    | 1.144    |
|                               | HIC       | 4                | 1.169      | 0.678    | 2.015    | 10          | 0.993      | 0.863    | 1.144    |
|                               | LMIC      | -                | -          | -        | -        | -           | -          | -        | -        |
| BMI 30+ Kg/m <sup>2</sup>     | Global    | 3                | 1.468      | 0.888    | 2.427    | 17          | 1.368      | 1.151    | 1.627    |
|                               | HIC       | 3                | 1.468      | 0.888    | 2.427    | 13          | 1.438      | 1.207    | 1.712    |
|                               | LMIC      | -                | -          | -        | -        | 4           | 1.184      | 0.856    | 1.638    |

|                                |        |   |       |       |       |   |       |       |       |
|--------------------------------|--------|---|-------|-------|-------|---|-------|-------|-------|
| <b>BMI &gt;85th percentile</b> | Global | 3 | 1.410 | 0.840 | 2.368 | 3 | 1.459 | 0.897 | 2.374 |
|                                | HIC    | - | -     | -     | -     | 3 | 1.459 | 0.897 | 2.374 |
|                                | LMIC   | 3 | 1.410 | 0.840 | 2.368 | - | -     | -     | -     |
| <b>Carpets</b>                 | Global | 3 | 0.925 | 0.501 | 1.708 | 6 | 1.029 | 0.862 | 1.229 |
|                                | HIC    | - | -     | -     | -     | 6 | 1.029 | 0.862 | 1.229 |

| Factor                                                | WB region | Current wheezing |            |          |          | Ever asthma |            |          |          |
|-------------------------------------------------------|-----------|------------------|------------|----------|----------|-------------|------------|----------|----------|
|                                                       |           | Data points      | Odds ratio | Lower CI | Upper CI | Data points | Odds ratio | Lower CI | Upper CI |
|                                                       | LMIC      | 3                | 0.925      | 0.501    | 1.708    | -           | -          | -        | -        |
| <b>Central heating</b>                                | Global    | 6                | 0.931      | 0.437    | 1.983    | 4           | 1.112      | 0.932    | 1.326    |
|                                                       | HIC       | 3                | 1.290      | 1.162    | 1.432    | 4           | 1.112      | 0.932    | 1.326    |
|                                                       | LMIC      | 3                | 0.590      | 0.313    | 1.111    | -           | -          | -        | -        |
| <b>Cockroaches</b>                                    | Global    | 6                | 1.216      | 0.549    | 2.69     | -           | -          | -        | -        |
|                                                       | HIC       | 3                | 0.800      | 0.566    | 1.131    | -           | -          | -        | -        |
|                                                       | LMIC      | 3                | 1.800      | 1.48     | 2.190    | -           | -          | -        | -        |
| <b>Current smoker</b>                                 | Global    | 7                | 2.164      | 1.647    | 2.844    | 14          | 1.205      | 1.075    | 1.351    |
|                                                       | HIC       | 3                | 2.721      | 1.696    | 4.368    | 8           | 1.190      | 1.060    | 1.336    |
|                                                       | LMIC      | 4                | 1.683      | 1.476    | 1.919    | 6           | 1.267      | 1.040    | 1.708    |
| <b>Ever smoker</b>                                    | Global    | 7                | 2.385      | 1.883    | 3.021    | 7           | 1.261      | 1.010    | 1.575    |
|                                                       | HIC       | 4                | 2.084      | 1.781    | 2.438    | 4           | 1.102      | 1.065    | 1.258    |
|                                                       | LMIC      | 3                | 4.483      | 2.985    | 6.733    | 3           | 1.578      | 1.242    | 2.005    |
| <b>Ex smoker</b>                                      | Global    | 3                | 1.604      | 1.222    | 2.105    | 8           | 1.242      | 1.069    | 1.443    |
|                                                       | HIC       | 3                | 1.604      | 1.222    | 2.105    | 8           | 1.242      | 1.069    | 1.443    |
|                                                       | LMIC      | -                | -          | -        | -        | -           | -          | -        | -        |
| <b>Environmental tobacco smoke/ Second-hand smoke</b> | Global    | 10               | 1.039      | 0.833    | 1.295    | 14          | 1.234      | 1.063    | 1.431    |
|                                                       | HIC       | 3                | 0.860      | 0.668    | 1.107    | 8           | 1.103      | 1.039    | 1.296    |
|                                                       | LMIC      | 7                | 1.161      | 0.873    | 1.545    | 6           | 1.525      | 1.111    | 2.095    |
| <b>Eczema</b>                                         | Global    | 7                | 2.823      | 1.98     | 4.027    | 8           | 2.817      | 1.866    | 4.252    |
|                                                       | HIC       | 4                | 2.395      | 1.533    | 3.741    | 4           | 2.606      | 2.216    | 3.065    |
|                                                       | LMIC      | 3                | 3.761      | 1.709    | 8.281    | 4           | 2.816      | 1.073    | 7.390    |
| <b>Exclusive breastfeeding</b>                        | Global    | 7                | 1.030      | 0.783    | 1.354    | 6           | 0.834      | 0.606    | 1.146    |
|                                                       | HIC       | 3                | 1.266      | 0.974    | 1.644    | 3           | 1.098      | 0.796    | 1.514    |
|                                                       | LMIC      | 4                | 0.795      | 0.593    | 1.065    | 3           | 0.546      | 0.334    | 0.893    |
| <b>Family history of allergy</b>                      | Global    | 9                | 2.314      | 1.803    | 2.969    | 6           | 4.712      | 1.823    | 12.176   |
|                                                       | HIC       | 6                | 2.272      | 1.706    | 3.025    | 3           | 3.010      | 2.246    | 4.033    |
|                                                       | LMIC      | 3                | 2.460      | 1.672    | 3.620    | 3           | 5.702      | 0.729    | 44.633   |
| <b>Family history of asthma</b>                       | Global    | 14               | 2.844      | 2.342    | 3.454    | 18          | 3.209      | 2.429    | 4.240    |
|                                                       | HIC       | 5                | 2.306      | 1.936    | 2.746    | 12          | 2.876      | 2.450    | 3.376    |

|                               | LMIC             | 9                       | 3.310             | 2.443           | 4.484           | 6                  | 4.529             | 2.435           | 8.422           |
|-------------------------------|------------------|-------------------------|-------------------|-----------------|-----------------|--------------------|-------------------|-----------------|-----------------|
| <b>Family history atopy</b>   | Global           | 7                       | 1.458             | 1.153           | 1.842           | 10                 | 1.981             | 1.430           | 2.746           |
|                               | HIC              | 3                       | 1.800             | 1.436           | 2.256           | 7                  | 1.978             | 1.500           | 2.608           |
|                               | LMIC             | 4                       | 1.239             | 1.013           | 1.515           | 3                  | 1.707             | 0.516           | 5.654           |
| <b>Farming</b>                | Global           | 3                       | 0.846             | 0.636           | 1.125           | -                  | -                 | -               | -               |
|                               | HIC              | 3                       | 0.846             | 0.636           | 1.125           | -                  | -                 | -               | -               |
|                               | LMIC             | -                       | -                 | -               | -               | -                  | -                 | -               | -               |
| <b>Female</b>                 | Global           | 14                      | 1.029             | 0.846           | 1.252           | 25                 | 0.972             | 0.854           | 1.106           |
|                               | HIC              | 8                       | 1.086             | 0.838           | 1.407           | 22                 | 0.967             | 0.840           | 1.113           |
|                               | LMIC             | 6                       | 0.941             | 0.692           | 1.279           | 3                  | 1.007             | 0.757           | 1.338           |
| <b>Male</b>                   | Global           | 15                      | 1.176             | 0.984           | 1.406           | 20                 | 1.159             | 0.981           | 1.369           |
|                               | HIC              | 11                      | 1.143             | 1.025           | 1.413           | 13                 | 1.327             | 1.128           | 1.562           |
|                               | LMIC             | 4                       | 1.294             | 0.930           | 1.801           | 7                  | 0.862             | 0.483           | 1.541           |
| <b>Factor</b>                 | <b>WB region</b> | <b>Current wheezing</b> |                   |                 |                 | <b>Ever asthma</b> |                   |                 |                 |
|                               |                  | <b>Data points</b>      | <b>Odds ratio</b> | <b>Lower CI</b> | <b>Upper CI</b> | <b>Data points</b> | <b>Odds ratio</b> | <b>Lower CI</b> | <b>Upper CI</b> |
| <b>Health insurance</b>       | Global           | -                       | -                 | -               | -               | 3                  | 1.057             | 0.974           | 1.148           |
|                               | HIC              | -                       | -                 | -               | -               | 3                  | 1.057             | 0.974           | 1.148           |
|                               | LMIC             | -                       | -                 | -               | -               | -                  | -                 | -               | -               |
| <b>High income</b>            | Global           | 3                       | 0.836             | 0.688           | 1.015           | 3                  | 1.219             | 0.731           | 2.036           |
|                               | HIC              | 3                       | 0.836             | 0.688           | 1.015           | 3                  | 1.219             | 0.731           | 2.036           |
|                               | LMIC             | -                       | -                 | -               | -               | -                  | -                 | -               | -               |
| <b>Low income</b>             | Global           | -                       | -                 | -               | -               | 3                  | 1.034             | 0.649           | 1.646           |
|                               | HIC              | -                       | -                 | -               | -               | 3                  | 1.034             | 0.649           | 1.646           |
|                               | LMIC             | -                       | -                 | -               | -               | -                  | -                 | -               | -               |
| <b>Hypertension</b>           | Global           | -                       | -                 | -               | -               | 3                  | 1.055             | 0.848           | 1.311           |
|                               | HIC              | -                       | -                 | -               | -               | 3                  | 1.055             | 0.848           | 1.311           |
|                               | LMIC             | -                       | -                 | -               | -               | -                  | -                 | -               | -               |
| <b>College or higher</b>      | Global           | 6                       | 1.068             | 0.918           | 1.244           | 8                  | 0.883             | 0.703           | 1.111           |
|                               | HIC              | 3                       | 1.100             | 0.938           | 1.289           | 5                  | 0.913             | 0.639           | 1.305           |
|                               | LMIC             | 3                       | 0.780             | 0.462           | 1.317           | 3                  | 0.800             | 0.717           | 0.893           |
| <b>Middle school or lower</b> | Global           | 3                       | 1.066             | 0.727           | 1.562           | 8                  | 1.021             | 0.849           | 1.228           |
|                               | HIC              | 3                       | 1.066             | 0.727           | 1.562           | 5                  | 1.009             | 0.724           | 1.406           |
|                               | LMIC             | -                       | -                 | -               | -               | 3                  | 1.351             | 0.629           | 2.902           |
| <b>Dampness</b>               | Global           | 10                      | 1.411             | 1.170           | 1.701           | 7                  | 1.250             | 1.028           | 1.521           |
|                               | HIC              | 7                       | 1.391             | 1.171           | 1.651           | 4                  | 1.301             | 1.075           | 1.574           |
|                               | LMIC             | 3                       | 1.537             | 0.862           | 2.742           | 3                  | 1.071             | 0.523           | 2.191           |
| <b>Mould</b>                  | Global           | 3                       | 2.000             | 1.225           | 3.266           | 5                  | 1.792             | 1.098           | 3.217           |
|                               | HIC              | 3                       | 2.000             | 1.225           | 3.266           | 5                  | 1.792             | 1.098           | 3.217           |
|                               | LMIC             | -                       | -                 | -               | -               | -                  | -                 | -               | -               |

| <b>Indoor water leaking</b>           | Global           | 6                       | 1.352             | 1.051           | 1.740           | 6                  | 1.470             | 0.918           | 2.354           |
|---------------------------------------|------------------|-------------------------|-------------------|-----------------|-----------------|--------------------|-------------------|-----------------|-----------------|
|                                       | HIC              | 3                       | 1.600             | 0.687           | 3.728           | 3                  | 1.567             | 0.687           | 3.578           |
|                                       | LMIC             | 3                       | 1.330             | 1.021           | 1.732           | 3                  | 1.300             | 1.038           | 1.627           |
| <b>Overcrowding</b>                   | Global           | 3                       | 1.041             | 0.858           | 1.263           | 6                  | 0.891             | 0.687           | 1.156           |
|                                       | HIC              | -                       | -                 | -               | -               | 3                  | 0.962             | 0.690           | 1.343           |
|                                       | LMIC             | 3                       | 1.041             | 0.858           | 1.263           | 3                  | 0.736             | 0.514           | 1.056           |
| <b>Parents high education</b>         | Global           | 6                       | 0.928             | 0.853           | 1.010           | 6                  | 1.277             | 1.035           | 1.574           |
|                                       | HIC              | 3                       | 0.946             | 0.851           | 1.051           | 3                  | 1.210             | 0.964           | 1.520           |
|                                       | LMIC             | 3                       | 0.888             | 0.760           | 1.037           | 3                  | 1.780             | 1.083           | 2.927           |
| <b>Parents' low education</b>         | Global           | 6                       | 1.130             | 0.792           | 1.612           | 8                  | 0.938             | 0.748           | 1.177           |
|                                       | HIC              | 3                       | 1.338             | 1.058           | 1.692           | 8                  | 0.938             | 0.748           | 1.177           |
|                                       | LMIC             | 3                       | 0.750             | 0.461           | 1.221           | -                  | -                 | -               | -               |
| <b>Parents' low income</b>            | Global           | -                       | -                 | -               | -               | 4                  | 1.406             | 0.891           | 2.219           |
|                                       | HIC              | -                       | -                 | -               | -               | 4                  | 1.406             | 0.891           | 2.219           |
|                                       | LMIC             | -                       | -                 | -               | -               | -                  | -                 | -               | -               |
| <b>Parents' smoking</b>               | Global           | 7                       | 1.295             | 1.120           | 1.497           | 24                 | 1.383             | 1.218           | 1.571           |
|                                       | HIC              | 4                       | 1.296             | 1.066           | 1.574           | 18                 | 1.207             | 1.085           | 1.343           |
|                                       | LMIC             | 3                       | 1.300             | 1.026           | 1.646           | 6                  | 1.862             | 1.431           | 2.424           |
| <b>Parents' unemployed</b>            | Global           | 3                       | 0.980             | 0.789           | 1.218           | 3                  | 1.804             | 1.119           | 2.907           |
|                                       | HIC              | -                       | -                 | -               | -               | -                  | -                 | -               | -               |
| <b>Factor</b>                         | <b>WB region</b> | <b>Current wheezing</b> |                   |                 |                 | <b>Ever asthma</b> |                   |                 |                 |
|                                       |                  | <b>Data points</b>      | <b>Odds ratio</b> | <b>Lower CI</b> | <b>Upper CI</b> | <b>Data points</b> | <b>Odds ratio</b> | <b>Lower CI</b> | <b>Upper CI</b> |
|                                       | LMIC             | 3                       | 0.980             | 0.789           | 1.218           | 3                  | 1.804             | 1.119           | 2.907           |
| <b>Pets</b>                           | Global           | 19                      | 1.059             | 0.964           | 1.163           | 21                 | 1.212             | 0.979           | 1.502           |
|                                       | HIC              | 9                       | 0.955             | 0.858           | 1.062           | 15                 | 1.187             | 0.921           | 1.530           |
|                                       | LMIC             | 10                      | 1.179             | 1.040           | 1.336           | 6                  | 1.311             | 0.898           | 1.913           |
| <b>Previous respiration infection</b> | Global           | 6                       | 2.044             | 1.095           | 3.814           | 3                  | 1.890             | 0.947           | 3.774           |
|                                       | HIC              | 3                       | 1.537             | 0.930           | 2.538           | 3                  | 1.890             | 0.947           | 3.774           |
|                                       | LMIC             | 3                       | 3.600             | 2.830           | 4.580           | -                  | -                 | -               | -               |
| <b>Rural</b>                          | Global           | 6                       | 0.839             | 0.568           | 1.240           | 4                  | 1.190             | 0.787           | 1.801           |
|                                       | HIC              | 3                       | 0.924             | 0.582           | 1.467           | 4                  | 1.190             | 0.787           | 1.801           |
|                                       | LMIC             | 3                       | 0.630             | 0.438           | 0.906           | -                  | -                 | -               | -               |
| <b>Urban</b>                          | Global           | 6                       | 1.016             | 0.883           | 1.168           | 12                 | 1.227             | 1.036           | 1.453           |
|                                       | HIC              | 3                       | 1.003             | 0.822           | 1.223           | 7                  | 1.093             | 0.896           | 1.335           |
|                                       | LMIC             | 3                       | 1.057             | 0.821           | 1.360           | 5                  | 1.456             | 1.151           | 1.842           |
| <b>Siblings 2+</b>                    | Global           | 6                       | 0.920             | 0.657           | 1.287           | 6                  | 0.845             | 0.72            | 0.992           |
|                                       | HIC              | 3                       | 0.826             | 0.671           | 1.016           | 3                  | 0.822             | 0.677           | 0.999           |
|                                       | LMIC             | 3                       | 1.300             | 0.365           | 4.624           | 3                  | 0.950             | 0.669           | 1.349           |

|                          |        |   |   |   |   |   |       |       |       |
|--------------------------|--------|---|---|---|---|---|-------|-------|-------|
| <b>Traffic pollution</b> | Global | - | - | - | - | 6 | 1.709 | 1.246 | 2.342 |
|                          | HIC    | - | - | - | - | 3 | 1.914 | 0.582 | 6.297 |
|                          | LMIC   | - | - | - | - | 3 | 1.611 | 1.426 | 1.819 |

CI – confidence interval, WB – World Bank.

There are 49 associated factors in total (45 Asthma ever and 43 Current wheeze). Blank spaces are those not reported or with less than 3 data points. HIC and LMIC datapoints add up to give the total.

\*Meta-ORs included in the regional and national-level estimates.

ORs for binary variable associated factors are compared with those without the factor.

A total of 43 factors were explored for current wheezing and 45 were for ever asthma. Significant associated factors of both “current wheezing” and “ever asthma” globally included having history of allergic rhinitis, atopy or allergies for adults, and family history of asthma, atopy or allergies for children. This was also applicable for all categories of smoking (current, former, and ever) for adults, and having one or both parents smoking for children. In addition, having eczema was significantly associated with “current wheezing” and “ever asthma” in both adults and children globally. However, environmental tobacco smoke (second-hand tobacco smoke) was only statistically significant associated factor of “ever asthma” across all settings. Dampness, mould and indoor water leaking were major associated factors in LMICs. The effects of sex on “current wheezing” and “ever asthma” were still unclear. However, being a male was slightly associated with a higher risk in HICs. Obesity was also a major associated factor of “ever asthma” in HICs, while biomass exposures and traffic pollution were significant associated factors in LMICs



### Additional notes on associated factors of asthma

The contributions of climate, weather and environmental factors to asthma in different settings are still subject to further research. For example, the high prevalence of asthma in some tropical settings may not explain similar or higher prevalence rates observed in nontropical settings in the EUR. This suggests an interplay of several contextual factors, including environmental, genetic, socioeconomic, and demographic factors and perhaps seasonal variations in the onset of respiratory infections, a known risk of chronic respiratory diseases.(4) Indeed, this complex interplay of risk factors plays important roles in the global pattern of asthma symptoms with important differences within and between countries.(5) We could not directly account for indoor and outdoor air pollution, however, exposures to products of biomass combustion and traffic pollution are leading risk factors for asthma in LMICs, particularly in several cities in China and South-east Asia, where limited restrictions on traffic and industrial pollution have continued to have huge impacts on their large populations.(6, 7) For instance, in a recent global study, about 50% of emergency rooms visits attributable to poor air quality occurred in China, India, Pakistan and Bangladesh.(8) In emerging economies like Nigeria, Egypt and Ethiopia, the prevalent use of solid fuels like wood and charcoal for domestic purposes particularly in urban slums and rural areas, and harvesting and threshing in rural agriculture, are additional risks besides those from factory fumes, contributing to indoor air pollution and other unfavorable household conditions.(9, 10) Besides, there is a need to equally consider poor and vulnerable populations in HICs who are also exposed to adverse living conditions, air pollution, and damp environments. Studies have shown that in genetically susceptible persons, being obese or overweight tends to increase the risk of asthma.(11, 12) In this study, obesity was only a significant risk factor for asthma in HICs, with our findings in LMICs rather inconclusive due to limited datasets reporting this. Other than a chronic inflammatory response, the mechanisms of the relationship between obesity and asthma across different contexts remain largely unknown.(12) There are speculations of a lack of differentiation between breathlessness in obese individuals and actual wheeze due to asthma.(13) Indeed, this association needs to be investigated further in large global studies, as many studies reporting the association appear not well powered or with low-quality evidence.(14) However, weight loss in obese asthma patients has been associated with significant improvements in asthma symptoms, exacerbations, exercise intolerance and response to some medications,(15) further suggesting a need for research to better understand the mechanism of this interaction to guide new therapies and specific management options. While we could not account specifically for age-sex differences in asthma risks across settings as most studies did not report this, hormonal factors have been indicated in the pattern of asthma observed in both sexes, with asthma common among boys before attaining puberty and girls having a higher risk thereafter.(7, 16, 17)

Meanwhile, the effects of exclusive breastfeeding in early life against asthma are still debated, we however found this to be modestly protective for asthma ever only in LMICs, albeit. The findings of a longitudinal study in Tasmania did show that exclusive breastfeeding may be protective in children before attaining 7 years but associated with increased risk in later life.(18) In a Canadian birth cohort, wheezing was reduced by 62% and 37% among infants with exclusive breastfeeding or partial breastfeeding at 6 months.(19)

### References

1. United Nations Department of Economic and Social Affairs. 2018 Revision of World Urbanization Prospects. Available from: <https://population.un.org/wup/>. Accessed: 18 April 2021.
2. World Health Organization. The Global Health Observatory 2021. Available from: <https://www.who.int/data/gho>. Accessed: 18 April 2021.
3. Global Burden of Disease Collaborative Network. Global Burden of Disease Study 2019 (GBD 2019) Socio-Demographic Index (SDI) 1950–2019. Available from:

<http://ghdx.healthdata.org/record/ihme-data/gbd-2019-socio-demographic-index-sdi-1950-2019>.

Accessed: 18 April 2021.

4. Baena-Cagnani CE. The global burden of asthma and allergic diseases: the challenge for the new century. *Current Allergy & Asthma Reports*. 2001;1(4):297-8.
5. Global Asthma Network. The Global Asthma Report 2018. Available from: [http://www.globalasthmareport.org/resources/global\\_asthma\\_report\\_2018.pdf](http://www.globalasthmareport.org/resources/global_asthma_report_2018.pdf). Accessed: 18 April 2021.
6. India State-Level Disease Burden Initiative CRDC. The burden of chronic respiratory diseases and their heterogeneity across the states of India: the Global Burden of Disease Study 1990-2016. *The Lancet Global Health*. 2018;6(12):e1363-e74.
7. Li X, Song P, Zhu Y, Lei H, Chan KY, Campbell H, et al. The disease burden of childhood asthma in China: a systematic review and meta-analysis. *Journal of global health*. 2020;10(1):010801-.
8. Anenberg SC, Henze DK, Tinney V, Kinney PL, Raich W, Fann N, et al. Estimates of the Global Burden of Ambient PM<sub>2.5</sub>, Ozone, and NO<sub>2</sub> on Asthma Incidence and Emergency Room Visits. *Environmental Health Perspectives*. 2018;126(10):107004.
9. van Gemert F, van der Molen T, Jones R, Chavannes N. The impact of asthma and COPD in sub-Saharan Africa. *Primary Care Respiratory Journal*. 2011;20(3):240-8.
10. Adeloye D, Chan KY, Rudan I, Campbell H. An estimate of asthma prevalence in Africa: a systematic analysis. *Croatian Medical Journal*. 2013;54(6):519-31.
11. Peters U, Dixon AE, Forno E. Obesity and asthma. *J Allergy Clin Immunol*. 2018;141(4):1169-79.
12. Lv N, Xiao L, Camargo CA, Jr., Wilson SR, Buist AS, Strub P, et al. Abdominal and general adiposity and level of asthma control in adults with uncontrolled asthma. *Annals of the American Thoracic Society*. 2014;11(8):1218-24.
13. Global Initiative for Asthma. Global strategy for asthma management and prevention. [https://ginasthma.org/wp-content/uploads/2020/04/GINA-2020-full-report\\_-final-\\_wmspdf](https://ginasthma.org/wp-content/uploads/2020/04/GINA-2020-full-report_-final-_wmspdf). Accessed: 20 April 2021.
14. Beuther DA, Sutherland ER. Overweight, obesity, and incident asthma: a meta-analysis of prospective epidemiologic studies. *American Journal of Respiratory & Critical Care Medicine*. 2007;175(7):661-6.
15. Juel CT, Ali Z, Nilas L, Ulrik CS. Asthma and obesity: does weight loss improve asthma control? a systematic review. *Journal of asthma and allergy*. 2012;5:21-6.
16. Dharmage SC, Perret JL, Custovic A. Epidemiology of Asthma in Children and Adults. *Front Pediatr*. 2019;7(246).
17. Guo X, Li Z, Ling W, Long J, Su C, Li J, et al. Epidemiology of childhood asthma in mainland China (1988-2014): A meta-analysis. *Allergy & Asthma Proceedings*. 2018;39(3):15-29. 18. Matheson MC, Erbas B, Balasuriya A, Jenkins MA, Wharton CL, Tang ML, et al. Breastfeeding and atopic disease: a cohort study from childhood to middle age. *J Allergy Clin Immunol*. 2007;120(5):1051-7.
19. Azad MB, Vehling L, Lu Z, Dai D, Subbarao P, Becker AB, et al. Breastfeeding, maternal asthma and wheezing in the first year of life: a longitudinal birth cohort study. *The European respiratory journal*. 2017;49(5).
